# Supplementary material for: The chromosome-scale genome of Magnolia sinica (Magnoliaceae) provides insights into the conservation of plant species with extremely small populations (PSESP)
Source: PubMed Central journal article supplement (PMC10999834; doi:10.1093/gigascience/giad110), 2024-01-11

# GigaScience

## The chromosome-scale genome of *Magnolia sinica* (Magnoliaceae) provides insights into the conservation of plant species with extremely small populations (PSESP) --Manuscript Draft--

|                                                      |                                                                                                                                                                                                                                                                                                                                                                                                                                                                                                                                                                                                                                                                                                                                                                                                                                                                                                                                                                                                                                                                                                                                                                                                                                                                                                                                                                                                                                                                                                                                                                                                                                                                                                                                                                                                                                                 |                   |
|------------------------------------------------------|-------------------------------------------------------------------------------------------------------------------------------------------------------------------------------------------------------------------------------------------------------------------------------------------------------------------------------------------------------------------------------------------------------------------------------------------------------------------------------------------------------------------------------------------------------------------------------------------------------------------------------------------------------------------------------------------------------------------------------------------------------------------------------------------------------------------------------------------------------------------------------------------------------------------------------------------------------------------------------------------------------------------------------------------------------------------------------------------------------------------------------------------------------------------------------------------------------------------------------------------------------------------------------------------------------------------------------------------------------------------------------------------------------------------------------------------------------------------------------------------------------------------------------------------------------------------------------------------------------------------------------------------------------------------------------------------------------------------------------------------------------------------------------------------------------------------------------------------------|-------------------|
| <b>Manuscript Number:</b>                            | GIGA-D-23-00060                                                                                                                                                                                                                                                                                                                                                                                                                                                                                                                                                                                                                                                                                                                                                                                                                                                                                                                                                                                                                                                                                                                                                                                                                                                                                                                                                                                                                                                                                                                                                                                                                                                                                                                                                                                                                                 |                   |
| <b>Full Title:</b>                                   | The chromosome-scale genome of <i>Magnolia sinica</i> (Magnoliaceae) provides insights into the conservation of plant species with extremely small populations (PSESP)                                                                                                                                                                                                                                                                                                                                                                                                                                                                                                                                                                                                                                                                                                                                                                                                                                                                                                                                                                                                                                                                                                                                                                                                                                                                                                                                                                                                                                                                                                                                                                                                                                                                          |                   |
| <b>Article Type:</b>                                 | Research                                                                                                                                                                                                                                                                                                                                                                                                                                                                                                                                                                                                                                                                                                                                                                                                                                                                                                                                                                                                                                                                                                                                                                                                                                                                                                                                                                                                                                                                                                                                                                                                                                                                                                                                                                                                                                        |                   |
| <b>Funding Information:</b>                          | National Science & Technology Basic Resources Investigation Program of China (2017FY100100)                                                                                                                                                                                                                                                                                                                                                                                                                                                                                                                                                                                                                                                                                                                                                                                                                                                                                                                                                                                                                                                                                                                                                                                                                                                                                                                                                                                                                                                                                                                                                                                                                                                                                                                                                     | Prof. Weibang Sun |
|                                                      | National Natural Science Foundation of China (NSFC) – Yunnan Joint Fund (U1302262)                                                                                                                                                                                                                                                                                                                                                                                                                                                                                                                                                                                                                                                                                                                                                                                                                                                                                                                                                                                                                                                                                                                                                                                                                                                                                                                                                                                                                                                                                                                                                                                                                                                                                                                                                              | Prof. Weibang Sun |
|                                                      | Yunnan Fundamental Research Projects (202101AT070173)                                                                                                                                                                                                                                                                                                                                                                                                                                                                                                                                                                                                                                                                                                                                                                                                                                                                                                                                                                                                                                                                                                                                                                                                                                                                                                                                                                                                                                                                                                                                                                                                                                                                                                                                                                                           | Dr. Lei Cai       |
|                                                      | National Natural Science Foundation of China (NSFC) (32101407)                                                                                                                                                                                                                                                                                                                                                                                                                                                                                                                                                                                                                                                                                                                                                                                                                                                                                                                                                                                                                                                                                                                                                                                                                                                                                                                                                                                                                                                                                                                                                                                                                                                                                                                                                                                  | Dr. Lei Cai       |
| <b>Abstract:</b>                                     | <p><i>Magnolia sinica</i> (Magnoliaceae) is one of the most highly threatened trees endemic to Southeast Yunnan, China. In this study, we generated for the first time a high-quality chromosome-scale genome sequence from <i>M. sinica</i>, by combining Illumina and PacBio data with Hi-C mapping methods. The final assembled genome size of <i>M. sinica</i> was 1.84 Gb, with a contig N50 of ca. 45 Mb and scaffold N50 of 92 Mb. Identified repeats constituted approximately 57% of the genome, and 43,473 protein-coding genes were predicted with high support. Phylogenetic analysis showed that the magnolias form a sister clade with the eudicots and the order Ceratophyllales, while the monocots are sister to the other core angiosperms. A total of 21 individuals from the five remnant populations of <i>M. sinica</i>, as well as 22 specimens belonging to eight related Magnoliaceae species, were resequenced. The results showed that <i>M. sinica</i> had higher genetic diversity (<math>\theta_w = 0.01126</math> and <math>\theta_\pi = 0.01158</math>) than other related species in the Magnoliaceae. However, population structure analysis suggested that the genetic differentiation among the five <i>M. sinica</i> populations was very low. Analyses of the demographic history of the species using different models consistently revealed that two bottleneck events occurred. The contemporary effective population size of <i>M. sinica</i> was estimated to be 10.9. Additionally, different patterns of genetic loads (inbreeding and numbers of deleterious mutations) suggested constructive conservation strategies for these five different populations of <i>M. sinica</i>. Overall, this high-quality genome could be a valuable genomic resource for conservation of <i>M. sinica</i>.</p> |                   |
| <b>Corresponding Author:</b>                         | Yongpeng Ma<br>CHINA                                                                                                                                                                                                                                                                                                                                                                                                                                                                                                                                                                                                                                                                                                                                                                                                                                                                                                                                                                                                                                                                                                                                                                                                                                                                                                                                                                                                                                                                                                                                                                                                                                                                                                                                                                                                                            |                   |
| <b>Corresponding Author Secondary Information:</b>   |                                                                                                                                                                                                                                                                                                                                                                                                                                                                                                                                                                                                                                                                                                                                                                                                                                                                                                                                                                                                                                                                                                                                                                                                                                                                                                                                                                                                                                                                                                                                                                                                                                                                                                                                                                                                                                                 |                   |
| <b>Corresponding Author's Institution:</b>           |                                                                                                                                                                                                                                                                                                                                                                                                                                                                                                                                                                                                                                                                                                                                                                                                                                                                                                                                                                                                                                                                                                                                                                                                                                                                                                                                                                                                                                                                                                                                                                                                                                                                                                                                                                                                                                                 |                   |
| <b>Corresponding Author's Secondary Institution:</b> |                                                                                                                                                                                                                                                                                                                                                                                                                                                                                                                                                                                                                                                                                                                                                                                                                                                                                                                                                                                                                                                                                                                                                                                                                                                                                                                                                                                                                                                                                                                                                                                                                                                                                                                                                                                                                                                 |                   |
| <b>First Author:</b>                                 | Lei Cai, Ph.D.                                                                                                                                                                                                                                                                                                                                                                                                                                                                                                                                                                                                                                                                                                                                                                                                                                                                                                                                                                                                                                                                                                                                                                                                                                                                                                                                                                                                                                                                                                                                                                                                                                                                                                                                                                                                                                  |                   |
| <b>First Author Secondary Information:</b>           |                                                                                                                                                                                                                                                                                                                                                                                                                                                                                                                                                                                                                                                                                                                                                                                                                                                                                                                                                                                                                                                                                                                                                                                                                                                                                                                                                                                                                                                                                                                                                                                                                                                                                                                                                                                                                                                 |                   |
| <b>Order of Authors:</b>                             | Lei Cai, Ph.D.                                                                                                                                                                                                                                                                                                                                                                                                                                                                                                                                                                                                                                                                                                                                                                                                                                                                                                                                                                                                                                                                                                                                                                                                                                                                                                                                                                                                                                                                                                                                                                                                                                                                                                                                                                                                                                  |                   |
|                                                      | Detuan Liu                                                                                                                                                                                                                                                                                                                                                                                                                                                                                                                                                                                                                                                                                                                                                                                                                                                                                                                                                                                                                                                                                                                                                                                                                                                                                                                                                                                                                                                                                                                                                                                                                                                                                                                                                                                                                                      |                   |
|                                                      | Fengmao Yang                                                                                                                                                                                                                                                                                                                                                                                                                                                                                                                                                                                                                                                                                                                                                                                                                                                                                                                                                                                                                                                                                                                                                                                                                                                                                                                                                                                                                                                                                                                                                                                                                                                                                                                                                                                                                                    |                   |
|                                                      |                                                                                                                                                                                                                                                                                                                                                                                                                                                                                                                                                                                                                                                                                                                                                                                                                                                                                                                                                                                                                                                                                                                                                                                                                                                                                                                                                                                                                                                                                                                                                                                                                                                                                                                                                                                                                                                 |                   |

|                                                                                                                                                                                                                                                                                                                                                                                                                                                                                                                                     |                  |
|-------------------------------------------------------------------------------------------------------------------------------------------------------------------------------------------------------------------------------------------------------------------------------------------------------------------------------------------------------------------------------------------------------------------------------------------------------------------------------------------------------------------------------------|------------------|
|                                                                                                                                                                                                                                                                                                                                                                                                                                                                                                                                     | Rengang Zhang    |
|                                                                                                                                                                                                                                                                                                                                                                                                                                                                                                                                     | Quanzheng Yun    |
|                                                                                                                                                                                                                                                                                                                                                                                                                                                                                                                                     | Zhiling Dao, PhD |
|                                                                                                                                                                                                                                                                                                                                                                                                                                                                                                                                     | Yongpeng Ma      |
|                                                                                                                                                                                                                                                                                                                                                                                                                                                                                                                                     | Weibang Sun, PhD |
| <b>Order of Authors Secondary Information:</b>                                                                                                                                                                                                                                                                                                                                                                                                                                                                                      |                  |
| <b>Additional Information:</b>                                                                                                                                                                                                                                                                                                                                                                                                                                                                                                      |                  |
| <b>Question</b>                                                                                                                                                                                                                                                                                                                                                                                                                                                                                                                     | <b>Response</b>  |
| Are you submitting this manuscript to a special series or article collection?                                                                                                                                                                                                                                                                                                                                                                                                                                                       | No               |
| <p><b>Experimental design and statistics</b></p> <p>Full details of the experimental design and statistical methods used should be given in the Methods section, as detailed in our <a href="#">Minimum Standards Reporting Checklist</a>. Information essential to interpreting the data presented should be made available in the figure legends.</p> <p>Have you included all the information requested in your manuscript?</p>                                                                                                  | Yes              |
| <p><b>Resources</b></p> <p>A description of all resources used, including antibodies, cell lines, animals and software tools, with enough information to allow them to be uniquely identified, should be included in the Methods section. Authors are strongly encouraged to cite <a href="#">Research Resource Identifiers</a> (RRIDs) for antibodies, model organisms and tools, where possible.</p> <p>Have you included the information requested as detailed in our <a href="#">Minimum Standards Reporting Checklist</a>?</p> | Yes              |
| <p><b>Availability of data and materials</b></p> <p>All datasets and code on which the conclusions of the paper rely must be</p>                                                                                                                                                                                                                                                                                                                                                                                                    | Yes              |

either included in your submission or deposited in [publicly available repositories](#) (where available and ethically appropriate), referencing such data using a unique identifier in the references and in the “Availability of Data and Materials” section of your manuscript.

Have you have met the above requirement as detailed in our [Minimum Standards Reporting Checklist](#)?

1     **The chromosome-scale genome of *Magnolia sinica* (Magnoliaceae)**  
2             **provides insights into the conservation of plant species with**  
3             **extremely small populations (PSESP)**

4     **Lei Cai<sup>1,†</sup>, Detuan Liu<sup>1,†</sup>, Fengmao Yang<sup>1</sup>, Rengang Zhang<sup>2</sup>, Quanzheng Yun<sup>2</sup>,**  
5             **Zhiling Dao<sup>1</sup>, Yongpeng Ma<sup>1,\*</sup>, Weibang Sun<sup>1,3\*</sup>**

6     <sup>1</sup> Yunnan Key Laboratory for Integrative Conservation of Plant Species with Extremely Small

7     Populations/ Key Laboratory for Plant Diversity and Biogeography of East Asia, Kunming

8     Institute of Botany, Chinese Academy of Sciences, Kunming, Yunnan, China

9     <sup>2</sup> Department of Bioinformatics, Ori (Shandong) Gene Science and Technology Co., Ltd.,

10    Weifang, Shandong, China

11    <sup>3</sup> Kunming Botanical Garden, Kunming Institute of Botany, Chinese Academy of Sciences,

12    Kunming, 650201, China

13

14    **Correspondence address.** Yongpeng Ma, E-mail: mayongpeng@mail.kib.ac.cn;

15    <http://orcid.org/0000-0002-7725-3677>; Weibang Sun, E-mail: wbsun@mail.kib.ac.cn;

16    <https://orcid.org/0000-0002-7195-2215>

17    <sup>†</sup>These authors contributed equally to this work.

18    **Abstract**

19    *Magnolia sinica* (Magnoliaceae) is one of the most highly threatened trees endemic to Southeast

20    Yunnan, China. In this study, we generated for the first time a high-quality chromosome-scale

21    genome sequence from *M. sinica*, by combining Illumina and PacBio data with Hi-C mapping

22    methods. The final assembled genome size of *M. sinica* was 1.84 Gb, with a contig N50 of ca. 45

23 Mb and scaffold N50 of 92 Mb. Identified repeats constituted approximately 57% of the genome,  
24 and 43,473 protein-coding genes were predicted with high support. Phylogenetic analysis showed  
25 that the magnolias form a sister clade with the eudicots and the order Ceratophyllales, while the  
26 monocots are sister to the other core angiosperms. A total of 21 individuals from the five remnant  
27 populations of *M. sinica*, as well as 22 specimens belonging to eight related Magnoliaceae species,  
28 were resequenced. The results showed that *M. sinica* had higher genetic diversity ( $\theta_w = 0.01126$   
29 and  $\theta_\pi = 0.01158$ ) than other related species in the Magnoliaceae. However, population structure  
30 analysis suggested that the genetic differentiation among the five *M. sinica* populations was very  
31 low. Analyses of the demographic history of the species using different models consistently revealed  
32 that two bottleneck events occurred. The contemporary effective population size of *M. sinica* was  
33 estimated to be 10.9. Additionally, different patterns of genetic loads (inbreeding and numbers of  
34 deleterious mutations) suggested constructive conservation strategies for these five different  
35 populations of *M. sinica*. Overall, this high-quality genome could be a valuable genomic resource  
36 for conservation of *M. sinica*.

37 **Keywords:** *Magnolia sinica*, PSESP, genome sequencing, deleterious mutation, population  
38 demographic, conservation

39

## 40 **1 Introduction**

41 The reduction of species diversity is of global concern, and has been closely linked with climate  
42 change and human activity. The conservation of biodiversity is therefore a hot topic [1–6]. The  
43 resolution of the recently convened CBD COP 15 (15th Conference of the Parties, Convention on  
44 Biological Diversity) supports biodiversity conservation issues of global concern, and one of the

45 goals (so called “30 × 30”) requires that at least 30% of the land, fresh water and oceans on Earth  
46 be protected in some form by 2030. In addition, identification of geographic areas with high  
47 concentrations of endemic and rare species diversity is an important step in protecting biodiversity  
48 [7]. The Mountains of Southwest China is one of the world's biodiversity hotspots, and is also  
49 affected by climate change and human disturbance, meaning that it is also an area at very serious  
50 risk of species extinction [8, 9]. Study and protection of the threatened species in this region is  
51 therefore of particular importance and urgency [10, 11]. In order to rescue the most highly threatened  
52 species and reduce their risks of extinction in this region, Chinese scholars put forward the concept  
53 of Plant Species with Extremely Small Populations (PSESP) in 2005, according to China's current  
54 national conditions and the practice of biodiversity protection [12–15]. That a species is threatened  
55 by human activities and interference is a necessary qualifying condition to determine whether that  
56 species meets the definition of PSESP, and human activities are also of significance when  
57 implementing rescuing protection for PSESPs [12, 16].

58 Plant genome sequencing has grown rapidly in the past 20 years, and the genomes sequences  
59 of more than 980 higher plant taxa have been published to date  
60 ([www.plabipd.de/plant\\_genomes\\_pa.ep](http://www.plabipd.de/plant_genomes_pa.ep)). Sequenced genomes can provide insights and evidence to  
61 better understand the genome biology and evolution of plants [17, 18]. Although the genomes of so  
62 many plant species have been studied, only few studies have sequenced the genomes of threatened  
63 plant species (examples include *Acer yangbiense*, *Acanthochlamys bracteata*, *Beta patula*,  
64 *Cercidiphyllum japonicum*, *Davidia involucrata*, *Dracaena cambodiana*, *Ginkgo biloba*, *Kingdonia*  
65 *uniflora*, *Ostrya rehderiana* and *Rhododendron griersonianum*) in order to focus on the  
66 conservation of these species [19–28].

67 Plant species in the family Magnoliaceae are hugely important in gardens and horticulture  
68 across the world [29, 30]. The Magnoliaceae is also one of the most highly threatened angiosperm  
69 groups. There are more than 300 species in this family, which are mainly distributed intermittently  
70 in the temperate, subtropical and tropical regions of East and Southeast Asia, East North America  
71 and central and South America [31–33]. About 120 species of Magnoliaceae are known from China,  
72 and Southwest and South China are the centers of diversity for this family [34]. Global conservation  
73 assessments suggest that 147 magnoliaceous species are facing threats, accounting for 48% of the  
74 total assessed species in this family [33]. Similarly, 76 species of Chinese Magnoliaceae are  
75 threatened, representing more than 50% of the total number of threatened Magnoliaceae species  
76 globally [35]. At present, in-depth genome research has only been conducted in three species in the  
77 Magnoliaceae (*Liriodendron chinense*, *Magnolia biondii* and *M. officinalis*), mainly to investigate  
78 the controversial evolutionary position of the magnoliids [36–38].

79 The evergreen tree *Magnolia sinica* (Law) Noot. (Magnoliaceae) is a typical PSESP endemic  
80 to Southeast Yunnan, where many threatened species are in urgent need of rescue and protection [12,  
81 14]. In China, the species is often referred to as *Manglietiastrum sinicum* Y.W. Law and is known  
82 as Huagaimu in Chinese [32, 34, 39, 40]. It has also been subsequently categorized as Critically  
83 Endangered on the *China Species Red List* [41], *The Red List of Magnoliaceae* [33, 42] and *The*  
84 *Threatened Species List of China's Higher Plants* [35]. *M. sinica* was proposed as a first-rank plant  
85 for national key protection in 1999 [43] and also in 2021  
86 ([www.forestry.gov.cn/main/3457/20210915/143259505655181.html](http://www.forestry.gov.cn/main/3457/20210915/143259505655181.html)), and was listed as one of 62  
87 PSESPs in Yunnan in 2010, and also as one of the 120 national PSESPs of China in 2012, requiring  
88 the most urgent rescue conservation [14, 15]. Recent survey data revealed only 52 individuals

89 remaining in the wild, and comprehensive conservation research and protection action of *M. sinica*  
90 have been implemented, including reproductive and seed biology, genetic diversity studies based on  
91 SSR, sequencing of the chloroplast genome, investigation of the soil microbiome, *in situ*  
92 conservation, *ex situ* conservation and reintroduction [44–49].

93 Here, we report the high-quality chromosome-scale genome sequence of *Magnolia sinica*, and  
94 compared it with other relevant published genomic data. By exploring the evolution of the genome,  
95 and the genetic characteristics, demographic history and genetic load of *M. sinica*, we have  
96 identified genomic factors that may contribute to the threats to this species, and, on the basis of this,  
97 we therefore propose conservation strategies for *M. sinica*.

## 98 **2 Materials and methods**

### 99 **2.1 Collection of plant material**

100 *Magnolia sinica* is only scattered in several counties in southeast Yunnan (Figures 1 & 3a).  
101 Fresh young leaf materials were collected for whole-genome sequencing from a single individual.  
102 This individual was conserved *ex situ* at the Kunming Botanical Garden (KBG), but was originally  
103 introduced from Xichou County, Southeast Yunnan. For transcriptome sequencing, leaf, stem and  
104 root samples were obtained from a three-year-old seedling also at KBG, and fresh fruits were  
105 collected from the wild in Jinping County, Yunnan. Fresh leaves used for genome library preparation,  
106 and other tissues used for transcriptome sequencing, were immediately frozen in liquid nitrogen and  
107 were stored at -80 °C in dry ice until DNA or RNA extraction. The remaining 21 leaf samples for  
108 re-sequencing were collected from the original species habitat in Xichou, Maguan and Jinping  
109 Counties from 2017 to 2019 (Table S1). Other DNA material from eight further species in the  
110 Magnoliaceae was used for comparison of genetic diversity and investigation of the phylogenic



111 relationships. This DNA material was collected from specimens cultivated at KBG and the  
112 Germplasm Bank of Wild Species, Chinese Academy of Sciences (Table S2). After the leaves were  
113 collected, they were quickly packed in silica gel desiccant and stored in silica gel until re-sequencing.

## 114 2.2 Genome sequencing

115 Genomic DNA sequencing was performed using different sequencing platforms  
116 simultaneously to insure accurate assembly. (1) For ONT (Oxford Nanopore Technologies)  
117 PromethION sequencing, total DNA was extracted using the cetyltrimethylammonium bromide  
118 (CTAB) method [50] using a QIAGEN® Genomic DNA Extraction kit (cat. no. 13323, Qiagen,  
119 Hilden, Germany). A NanoDrop™ One UV-Vis spectrophotometer (Thermo Fisher Scientific, USA)  
120 was then used to check DNA purity and a Qubit® 3.0 Fluorometer (Invitrogen, USA) was used to  
121 accurately quantify the DNA. After purification, the adapters from the LSK109 Ligation kit (cat. no.  
122 SQK-LSK109, Oxford) were used for the ligation reaction, and finally the Qubit® 3.0 Fluorometer  
123 (Invitrogen, USA) was used to quantify the constructed DNA library. The DNA library was  
124 subsequently transferred to Nanopore GridION X5/PromethION (ONT, UK) for sequencing. (2) For  
125 Illumina sequencing, short-insert libraries of 300–500 bp were prepared using 2 µg of genomic DNA,  
126 and three Illumina PCR-free libraries were constructed according to the standard manufacturer's  
127 protocol using the DNaseq Library Index Kit (Hangzhou Kaitai Biotechnology, Co., Ltd.,  
128 Hangzhou, China). The whole-genomic libraries were sequenced on an Illumina Hiseq X Ten  
129 platform. (3) The Hi-C library was prepared by Beijing Ori-Gene Science and Technology Co., Ltd.,  
130 Beijing, China. High molecular weight genomic DNA ( $\geq 700$  ng) was cross-linked *in situ*, extracted  
131 and then digested with a restriction enzyme. The DNA ends were then marked with biotin-14-dCTP,  
132 the crosslinked fragments were blunt-end ligated. Fragments were sheared to a size of 200–600 bp

133 with sonication. The Hi-C libraries were amplified using 12–14 cycles of PCR, and were sequenced  
134 in Illumina HiSeq X Ten platform. (4) Transcriptome sequencing was performed on a PacBio Sequel  
135 (Pacific Biosciences, Menlo Park, CA, USA) platform using full-length isoform sequencing (iso-  
136 seq) [51]. High-quality RNA was extracted with a Qiagen kit while a series of RNA samples were  
137 tested: Nanodrop was used to assess RNA purity, Qubit was used to precisely quantify the RNA,  
138 and an Agilent 2100 Bioanalyzer was used to calculate RIN values and 28S/18S. Then a SMARTer  
139 ® PCR cDNA Synthesis Kit was used to reverse transcribe the qualifying RNA into cDNA, The  
140 reverse transcription products were amplified using KAPA HiFi PCR Kits, and the amplified  
141 products were used to construct a SMRTbell library using a SMRTbell template prep kit 1.0. The  
142 third-generation sequencer Sequel was used to sequence the full-length cDNA to obtain high-quality  
143 original transcriptome sequencing data.

### 144 2.3 Genome assembly

145 We obtained ~203 G (~100×) ONT reads, ~215 G (~110×) Illumina Hiseq reads, ~222 G Hi-  
146 C reads, and ~24 G iso-seq reads (Table S3–S6). The *de novo* genome assembly was first performed  
147 on ONT reads using different assembly strategies, then using the Overlap-Layout-Consensus  
148 method [52] (Table S7–9). Primary assembly v0.1 was selected as the optimal assembly due to the  
149 low error rate. Then, the Illumina sequencing reads were modified using Pilon [53] to improve  
150 single-base-pair accuracy. The two draft assemblies were then merged using QuickMerge to  
151 improve continuity [54] and then polished again (Table S10–12). GetOrganelle software was used  
152 to assemble the mitochondrial and chloroplast genomes [55].

153 Hi-C reads were mapped to the draft assembly with Juicer, and a candidate chromosome-length  
154 assembly was generated automatically using the 3d-DNA pipeline to correct mis-joins, order,

155 orientation, and to anchor contigs [56, 57]. Manual review and refinement of the candidate assembly  
156 was performed in Juicebox Assembly Tools (JBAT) for quality control and interactive correction  
157 [58]. To reduce the influence of chromosome interactions and to further improve the chromosome  
158 scale assembly, each chromosome was separately re-scaffolded with 3d-DNA, and was then  
159 manually refined with Juicebox. Finally, the chromosome frame and scattered sequences were  
160 generated, with the gap length set as 100 bp.

161 To fill the assembly gaps, LR\_Gapcloser was run for two rounds based on ONT reads, and  
162 then NextPolish was run for three rounds to polish the assembly based on Illumina reads [59, 60].  
163 In order to eliminate redundancy and external source pollution: 1) Redundans was used to remove  
164 the redundant scattered sequences (identity  $\geq 0.98$ ) [61]; 2) Unplaced contigs with a length of less  
165 than 5 kb were removed; 3) The assembly was aligned with the NT library using BLASTn combined  
166 with coverage depth, to determine whether there was contamination from other species; and 4)  
167 Haplotigs or fragments with low average coverage depth were removed. The chromosomes were  
168 coded as chr01-chr19 according to their lengths (from long to short) (Fig 2a, b). The numbers,  
169 lengths and proportions of the chromosomes, scattered sequences, chloroplasts and mitochondria  
170 are summarized in **Table S13**.

#### 171 **2.4 Assessment of genome assembly**

172 The completeness of the final assembly was evaluated using BUSCO (Benchmarking Universal  
173 Single-copy Orthologues) and LAI (the LTR Assembly Index) [59, 62]. Bwa was used to map the  
174 Illumina reads to the genome and Minimap2 was used to map the third-generation ONT and PacBio  
175 transcriptome(iso-seq) CCS reads to the genome [63, 64]. The non-primary alignment was filtered  
176 out, so that each read only mapped once and the mapping ratio and coverage percentage were also

177 calculated (Table S14). The coverage depth of single-copy and multi-copy core genes should be  
178 consistent with a Poisson distribution if without redundancy after checking (Fig S1). The second-  
179 generation reads were compared to the genome with Bowtie2, and mutation sites were detected  
180 using SAMtools/BCFtools [65]. The single base heterozygous sites were used to calculate the  
181 heterozygosity rate, and the single base homozygous sites were used to calculate the error rate.  
182 Juicer was used to map the Hi-C data to the final genome assembly. The chromosome clustering  
183 effect of *Magnolia sinica* was good, and there was no obvious chromosome assembly error (Figure  
184 2a, 2b) [57].

## 185 2.5 Genome annotation

186 The repeat libraries were generated by *de novo* identification of the repeat region family using  
187 the RepeatModeler software. LTR\_retriever was also used to identify the intact LTR (long terminal  
188 repeat retrotransposons), and then a second library was clustered and generated [64]. After  
189 combining these two libraries, we used RepeatMasker to identify repeated regions on the genome.  
190 Transcripts were generated following the official process of isoSeq3  
191 (<https://github.com/yลิปacbio/IsoSeq3>) and were annotated to the genome using PASA pipeline [66].  
192 The results were used to train an AUGUSTUS model for five rounds of optimization [67]. 154,904  
193 merged non-redundant protein sequences from *Liriodendron chinense* [36], *Cinnamomum*  
194 *kanehirae* [68, 69], *Piper nigrum* [70], *Amborella trichopoda* [71] and *Arabidopsis thaliana* [72]  
195 were used as evidence of homologous proteins for gene annotation.

196 Gene structure annotation was conducted using Maker2 [73], and AUGUSTUS was used to  
197 perform ab initio prediction of the genome with the repetitive regions masked out [67]. Expressed  
198 sequence tags (ESTs) were aligned with the genome using BLASTN and T BLASTN, and BLASTN

199 was also used for the comparison of the protein evidence with the genome. Exonerate was used to  
200 optimize the previous alignments [74]. Based on the above evidence, hints files were generated, and  
201 AUGUSTUS was then used to integrate the prediction gene model. AED (annotation edit distance)  
202 scores of each gene model were calculated according to the EST evidence and the UTR annotations.  
203 Finally, false annotations in the coding frame and too short ( $\leq 50$  AA) gene annotations in the coding  
204 frame were removed. Software including tRNAScan-SE, Barrnap  
205 (<https://github.com/tseemann/barrnap>), and Rfamscan were used to annotate tRNA, rRNA and  
206 various ncRNA, respectively [75]. BUSCO was used to evaluate integrated annotated protein [62].

207 The functions of protein coding genes were annotated based on three strategies. Firstly, genes  
208 were matched with the eggNOG homologous gene database using eggNOG-mapper to annotate  
209 gene function, including GO and KEGG annotation [76]. Secondly, for assignment based on  
210 sequence conservation, a diamond search of the peptide sequences from several protein databases  
211 was performed, including the databases Swiss-Prot, TrEMBL, NR, *Arabidopsis* database and others  
212 [77]. Lastly, for assignment based on domain conservation, InterProScan was used to examine  
213 conserved amino acid sequences, motifs and domains of proteins by matching against sub databases  
214 of several Interpro databases, including CDD, PANTHER, PRINTS, Pfam, SMART and others [78].

## 215 **2.6 Gene family identification and phylogenetic analysis**

216 OrthoFinder2 was used to infer orthogroups, with the parameters set to "-M msa" [79]. A  
217 protein alignment of 1070 single-copy genes obtained from OrthoFinder2 was used to construct a  
218 phylogenetic tree using IQTREE, using a maximum likelihood method (the best model was  
219 JTT+F+R5, 1000 bootstrap replicates) [80]. In addition, ASTRAL was used to infer the species tree  
220 based on 3841 gene trees for comparison. MCMCTree, from the PAML package, was used to

221 estimate species divergence time and the mutation rate of *Magnolia sinica*, based on the codon  
222 alignment of 211 single-copy orthologous genes [81]. Four fossil calibration time points were  
223 chosen: stem Nymphaeaceae (113 Mya), stem Poaceae (55.8 Mya), stem Lauraceae (104 Mya), and  
224 stem Santalales (65.5 Mya). The root time of the phylogenetic tree was set according to previous  
225 studies [82, 83]. Based on the time tree and 12306 homologous gene families, CAFE was used to  
226 assess the expansion, contraction and rapid evolution of the gene families [84].

227       Based on the orthologous and paralogous gene relationships inferred with OrthoFinder2,  
228 collinearity between and within species was analyzed using MCScanX\_h [85]. According to the  
229 collinear homologous gene pairs obtained by MCScanX, the protein sequences were first aligned  
230 with MUSCLE [86], and then transformed into codon alignment with PAL2NAL [87]. Ka and Ks  
231 were then calculated between homologous gene pairs using KaKs\_Caculator v2.0 (YN model) [88,  
232 89]. Polyploidization events and time were inferred based on collinearity in combination with the  
233 Ks value [89].

## 234 **2.7 Genome mapping and SNP calling**

235       A total of 43 samples, including 21 samples of *Magnolia sinica* and 22 samples of a further  
236 eight *Magnolia* species, were sampled for whole genome resequencing (Table S1, S2). A total of  
237 5,687 million reads were produced across all samples. The raw data were filtered using fastp [90]  
238 to trim away the adaptors and low-quality regions. The cleaned reads were mapped to the reference  
239 genome using BWA-MAM [63] with the default parameters. The markdUp model in SAMtools [65]  
240 was used to mark and to remove duplicate reads. To improve the accuracy of the subsequent analyses,  
241 we only retained bases with a quality score > 20 and mapping quality > 30. We removed the  
242 duplicated sites, sites with a mapping depth of < 100 or > 600 as well as the sites not mapped to

243 chromosomes. 1,585,988,829 sites (Datasets1) from the BAM files were retained after quality  
244 control.

245 Freebayes [91] was used to process SNPs calling for *Magnolia sinica* and a total of  
246 176,087,519 variable sites were obtained. The resulting SNP dataset was then filtered using vcftools  
247 [92] using the following criteria: 1) sites with a genotype quality < 20 or genotypes with depth < 5  
248 were treated as missing; 2) non-biallelic SNP sites; 3) the SNPs with missing rate > 20% (Datasets2:  
249 11,438,677 SNPs); 4) sites with minor allele frequency (MAF) < 0.05 (Dataset 3: 3,580,172 SNPs).

## 250 2.8 Population genetics

251 PopLDdecay was used for linkage disequilibrium analysis across the *Magnolia sinica* genome.  
252 The ThetaStat module in ANGSD v0.93 [93] was used to assess genome wide diversity by  
253 calculating different estimators of Theta, including  $\theta_W$  (Watterson's theta) [94] and  $\theta\pi$  (nucleotide  
254 diversity), and Tajima's  $D$  [95], and Fu and Li's  $D$  [96]. These statistics were calculated in a window  
255 size of 20 kb and a step size of 10 kb according to the result of LD Decay, using Dataset1. Individual  
256 heterozygosity was also calculated in ANGSD v0.93 for *M. sinica* in our research.

257 For population structure analysis, we first used PLINK [97] to remove linkage sites from  
258 Dataset 4 with the parameter "--indep-pairwise 50 10 0.2", and we obtained a total of 454,661  
259 independent SNPs (Dataset 5). Dataset 5 was further used to explore the population structure of *M.*  
260 *sinica* using the program Admixture v1.3.0 [98], and the most likely number of genetic clusters  
261 (ancestor numbers, K) was selected based on 10-fold cross-validation error (CV) value.

## 262 2.9 Ancestral sequence reconstruction

263 We mapped data from several samples of other species of *Magnolia* and a sample of  
264 *Liriodendron* (Table S15) to *Magnolia sinica* using BWA-MEM with the default parameters. At the

265 same time, we used freebayes to call the genotype with the same filter parameters as the SNP calling  
266 described above, except that “--report-monomorphic” was used to keep monomorphic genotypes in  
267 the output. Phylogenetic trees were constructed using IQtree with the substitution model MFP+ASC  
268 and using *Liriodendron chinense* as the outgroup. We then used an empirical Bayesian method in  
269 IQtree [80] to reconstruct the ancestral state of each chromosome. Finally, we reclassified the  
270 ancestral state according to each site’s posterior probability. Posterior probabilities  $\geq 0.95$  were  
271 classed as “high confidence”; lower probabilities were considered to be ambiguous and were marked  
272 as "N". The sequence from the crown group *Magnolia* species were defined as ancestral.

### 273 **2.10 Inference of demographic history**

274 A Stairway plot was used to infer the demographic history of *Magnolia sinica* [99]. The  
275 mutation rate was estimated as  $1.2e-7$  per locus per generation and the Stairway plot was constructed  
276 using MCMCTree based on the four-fold degenerated sites (4DTv sites) of orthologous family genes.  
277 Generation time was set as 30 years, based on the cultivation records of this species in KBG. Dataset  
278 1 was further filtered by removing the sites within 5 kb of gene regions to ensure site neutrality. The  
279 unfolded Site Frequency Spectrum (SFS) for *M. sinica* was estimated using the functions doSaf and  
280 realSFS in ANGSD v 0.921 [93] with neutral sites and the recommended filtering parameters “-  
281 minMapQ 30 -minQ 20”.

282 We also used the Pairwise Sequentially Markovian Coalescent (PSMC) model to reconstruct  
283 the demographic history of *M. sinica* [100]. Using the BAM files generated by BWA-MEM and the  
284 markdup model in SAMtools [65], we made a consensus fastq file for each sample using SAMtools  
285 and BCFtools with the parameter set to -C50 to downgrade the mapping quality for reads containing  
286 excessive mismatches. The script vcfutils.pl was used to keep the minimum read depth to  $5\times$  and



287 the maximum read depth to 50 for all individuals. The consensus fastq file was converted into an  
288 input file for PSMC using fq2psmcfa with the parameter -q 20 set, to remove consensus calls with  
289 qualities  $\leq 20$ . The PSMC analysis was run using default values for the upper limit to assign a date  
290 to most recent common ancestor (-t 15) and theta/rho (-r 5). The atomic time interval pattern (-p)  
291 was set to "4+30\*2+4+6+10". We plotted the results using the same mutation rate and generation  
292 time as described above.

293 The contemporary effective population size of *Magnolia sinica* was assessed using the linkage  
294 disequilibrium method in NeEstimator V2 [93] with the reduced Dataset 5 (filtered by vcftools with  
295 --max missing 0.95 and --thin 60000) to ensure accuracy [101].

## 296 **2.11 Estimation of deleterious mutations and inbreeding**

297 Accumulation of deleterious mutations is likely to impact species fitness. The Sorting  
298 Intolerant from Tolerant (SIFT) algorithm [102] was used to predict deleterious mutations, with the  
299 ancestral sequences reconstructed above as a reference. The TrEMBL plant database [103] was used  
300 to search for orthologous genes. After polarization, protein-coding variants of Dataset2 were  
301 categorized as nonsynonymous and synonymous sites. Nonsynonymous sites were further divided  
302 into deleterious (SIFT score  $< 0.05$ ), and tolerated (SIFT score  $\geq 0.05$ ) based on their SIFT score  
303 [104]. We also calculated the derived allele frequency (DAF) of deleterious mutations. The  
304 deleterious mutations were annotated by performing gene ontology (GO) analysis and Kyoto  
305 Encyclopedia of Genes and Genomes (KEGG) analysis. GO terms and KEGG terms for the  
306 candidate genes with significant p value ( $< 0.05$ ) were retained.

307 In addition, frequency of runs of homozygosity (FROH) has been used as a robust estimate of  
308 genomic inbreeding [105] and was estimated following previous research [106, 107]. Briefly, runs

309 of homozygosity (ROH) were first identified using vcfTools v0.1.17 [92], then FROH was calculated  
310 with the total length of ROH divided by the genome size of *M. sinica*.

## 311 **Results**

### 312 **3.1 Genome sequencing and assembly**

313 The libraries sequenced on the ONT PromethION platforms using 6 cells resulted in the  
314 generation of a total of 9.11 million reads with ~202.85 Gb sequencing data (~100×), with an  
315 average read length of 22 kb (the longest read was 194 kb, and N50 was 25 kb) (Table S3). A total  
316 of 1,432 million reads were generated with ca. 214.95 Gb (~110×) data using the Illumina HiSeq  
317 platform (Table S4). A total of 1,480 million reads with ca. 222.13 Gb data were produced with Hi-  
318 C sequencing (Table S5). Through the optimal assembly method, the final size of the assembled  
319 *Magnolia sinica* genome was 1.84 Gb, which was similar to the 1.9 Gb genome size estimated using  
320 k-mers (Figure S2, Table S10, S11). A total of 108 contigs (1.82 Gb, accounting for 99.08% of the  
321 whole genome) with an average size of 15 Mb were anchored onto the 19 chromosomes. The contigs  
322 N50 of the *M. sinica* genome was ca. 45 Mb and the scaffold N50 ca. 92 Mb, much higher than  
323 those of other previously reported magnolia genomes (Table 1) [36–38]. In addition, the  
324 mitochondrial and chloroplast genomes were assembled into circular DNA molecules of 856,922  
325 bp and 160,070 bp, respectively. The complete core genes (including single- and multi-copy genes)  
326 account for 90.5% of the genome while the missing genes account for 6.7%, and the LAI value was  
327 estimated to be 10.3 based on LTR, indicating that the gene integrity was relatively good (Table S11,  
328 S12). We also calculated that the heterozygosity rate in *M. sinica* was about 1.21%, and that the  
329 error rate was about 0.0072%.

### 330 **3.2 Genome annotation**

331 A total of 2,329,558 repetitive sequences were identified in the *M. sinica* genome, with a total  
332 length of ~1.05 Gb, and accounting for 56.99 % genome. Of these, the highest proportion was LTR,  
333 accounting for 48.9% of the whole genome (Table S16). The most abundant repeat element families  
334 were Copia (388,301, 14.88 %) and Gypsy (759,932, 27.40 %) (Table S16). A total of 18 million  
335 subreads with ~24.58 Gb data were generated from transcriptome sequencing, from which 43,473  
336 protein-coding genes were annotated (Table S6, S17). The mean lengths of gene region, transcript,  
337 and coding DNA sequences were 11,297, 1,552, and 1,091, respectively (Table S17). Moreover, 71  
338 rRNA, 658 tRNA, and 511 ncRNA sequences were identified (Table S18). A total of 43,473 genes  
339 were annotated using GO (14,360, 33.03 %), KEGG (14,937, 34.36 %), egglog (29,585, 68.05 %)  
340 and COG (31,414, 72.26 %). Based on sequence conservation, several protein databases, including  
341 Swiss-Prot (21,220, 48.81 %), TrEMBL (31,720, 72.96 %), NR (31,242, 71.87 %) and *Arabidopsis*  
342 *thaliana* (25,007, 57.52 %) were annotated with BLAT. For assignment based on domain  
343 conservation, certain other databases of *M. sinica* were annotated with InterProScan. (Table S19)

344 1,303 (90.49 %) complete BUSCO genes, including 1,249 (86.74 %) complete and single-copy  
345 genes and 54 (3.75 %) complete and duplicated genes were identified among the 1,440 total BUSCO  
346 groups. However, 40 (2.78 %) genes were found to be fragmented and 97 (6.74 %) genes were  
347 missing based on the BUSCO analysis (Table S11).

### 348 3.3 Analysis of phylogeny, collinearity and WGD

349 In order to investigate the early evolution of the core angiosperms, we identified 579,290  
350 homologous genes belong to 20,538 gene families from the 18 related genomes using OrthoFinder2.  
351 A total of 1,266 expanded and 1,276 contracted gene families in *Magnolia sinica* were identified  
352 and annotated (Fig 2c). A maximum likelihood tree was constructed using 1,070 orthogroups of 18

353 species. As shown in the ML phylogenetic tree (Fig 2c), magnolias formed a sister relationship with  
354 both the eudicots and the Ceratophyllales, while the monocots were sister to the other core  
355 angiosperms. The Magnoliales and the Laurales were predicted to have diverged from the Piperales  
356 at ca. 149.3 Ma (137.7–160), a result which was slightly different from that of a whole-genome  
357 study of black pepper, in which the differentiation time was estimated at 175–187 Ma [70]. The  
358 Magnoliales were predicted to have diverged from the Laurales at ca. 122.2 Ma. In the Magnoliales,  
359 the estimated differentiation time of the genera *Magnolia* and *Liriodendron* was predicted to be 23.4  
360 Ma, and within *Magnolia*, the closely related species *M. sinica* and *M. biondii* are estimated to have  
361 diverged ca. 10.9 Ma.

362 A total of 7,807 colinear gene pairs on 779 colinear blocks were inferred within the *Magnolia*  
363 *sinica* genome. The collinearity between *M. sinica* and *Liriodendron chinense* was 1:1 (Figure S3),  
364 indicating that the two species have no species-specific whole-genome duplication (WGD) events.  
365 Collinearity between these two species and with earlier differentiated dicotyledons such as grapes  
366 was always 2:3 (Figure S4, S5), indicating that *M. sinica* and *L. chinense* experienced a WGD event  
367 after differentiation from the eudicots which is consistent with the conclusions of the *L. chinense*  
368 [36]. Similarly, the collinearity with the early angiosperms *Amborella trichopoda* and *Nymphaea*  
369 *tetragona* was 2:1 and 2:2 (Figure S6, S7), respectively, which indicates that *M. sinica* and *L.*  
370 *chinense* only experienced a single shared WGD event after their differentiation from these plants.  
371 From the paralogous collinearity block in *M. sinica*, it can be seen that this WGD event occurred at  
372 a Ks value of about 0.75. Based on the chromosome tree analysis, the Magnoliaceae and the  
373 Lauraceae share a WGD event, but this is not shared with pepper. After differentiation from other  
374 species, the Magnoliaceae (*M. sinica* and *L. chinense*) experienced a single WGD event, the

375 Lauraceae (*Cinnamomum kanehirae*) experienced two WGD events, and pepper experienced three  
376 WGD events.

### 377 3.4 Genome wide diversity and population structure

378 After filtering out low quality reads and adapter sequences, 5,386 million reads remained for  
379 processing (Table S20). The sequencing depth of *Magnolia sinica* samples ranged from 8.8× to  
380 12.6×, with a mean value of 10.5×, and were between 10.8×–14.3× for the other eight *Magnolia*  
381 species (Table S20). The mapping rates of *M. sinica* ranged from 90.80% to 99.70%, with a mean  
382 value of 97.63 %, and were 95.30%–99.53% for the other eight *Magnolia* species (Table S20).

383 The mean heterozygosity rate of *M. sinica* was  $(1.29 \pm 0.07)$  % (Table S21), ranging from 1.12 %  
384 to 1.38 %, and the trees with the lowest and the highest heterozygosity rates were both found in the  
385 XZQ population. The MAD population had the lowest heterozygosity (1.19 %), while the DLS  
386 population had the highest heterozygosity (1.32 %).

387 Nucleotide diversity in *M. sinica* was estimated using two parameters. Watterson's theta ( $\theta_w$ )  
388 and genome wide diversity ( $\theta\pi$ ) of *M. sinica* were calculated as 0.01416 and 0.01494, respectively  
389 (Table S22). When compared with other species, *M. sinica* was found to have higher genetic  
390 diversity (Table S23), and was approximately 12 folds higher than that of *Liriodendron chinense*  
391 (0.00123), a species from Magnoliaceae estimated using BioPerl [36].

392 The population structure results showed that the CV error was smallest when there was an  
393 optimal number of clusters  $K = 1$  (Figure S8), suggesting low genetic differentiation among  
394 populations of *M. sinica*. Low genetic differentiation among populations was further suggested by  
395 the low  $F_{st}$  statistics between population pairs of *M. sinica*, which had a mean value of 0.133. We  
396 have given the structure results for  $K = 2$  and  $K = 3$  in Figure 3b. At  $K = 2$ , all the populations of *M.*

397 *sinica* could be separated into three components, including an XZQ component (blue), the  
398 component (orange) from the FD population, and two individuals (KIBDZL15301 and  
399 KIBDZL15303) from the DLS population, as well as a mixture component. When  $K = 3$ , the FD  
400 population was further separated into two components, including an FD component and a mixture  
401 component. Both the XZQ and FD populations were genetically “pure” from the other *M. sinica*  
402 populations. The MAD and MC populations were genetically similar irrespective of  $K$ .

### 403 **3.5 Demographic history**

404 The demographic histories of *Magnolia sinica* inferred by Stairway plot2 indicate three  
405 significant population declines, two of which were also detected by PSMC (Figure 3c). In the  
406 scenario inferred from Stairway plot2, the earliest population decline occurred at 1.3 Ma and  
407 continued until 1.1 Ma. For the scenarios inferred by the PSMC, the earliest population decline  
408 occurred at 1.5 Ma and continued until 0.8 Ma. After this, the population of *M. sinica* is predicted  
409 to have experienced a period of recovery in both scenarios. The second population decline occurred  
410 at about 0.3 Ma in both scenarios. After that, the population of *M. sinica* exhibited recovery in the  
411 scenario inferred by Stairway plot2, but experienced a continuing decline in PSMC. The latest  
412 population bottleneck in both scenarios occurred at about 20 Ka and continued until 10 Ka, when  
413 the effective population size of *M. sinica* dropped to 1,936 in the Stairway plot and 1784 in PSMC.  
414 However, after 10 ka, the effective size of the *M. sinica* population recovered in Stairway plot, but  
415 showed continuous decline in PSMC. The contemporary effective population size of *M. sinica*  
416 estimated by NeEstimator V2 was 10.9 (3.3–43.7 Jackknife CI).

### 417 **3.6 Genetic load and genomic inbreeding coefficient**

418 1,196,374,340 high confidence loci were obtained and used as ancestral sequences to predict

419 deleterious mutations. 16,131, 74,385 and 36,827 sites were predicted to be deleterious,  
420 synonymous and tolerated, respectively, in the 21 re-sequenced *Magnolia sinica* individuals (Table  
421 S24). The mean value of derived homozygous deleterious alleles (HoDA) was 249, ranging from  
422 190 to 298, with the lowest found in the MC population, which had a mean number of 207 (190–  
423 216), and the highest found in XZQ, which had a mean number of 258 (220–298) (Table S25). The  
424 MAD population also harbors a very high number of HoDA (246), and this population had highest  
425 proportion of private HoDA (118, 48%) when compared with other populations (Figure 3d, Table  
426 S25). None of the HoDA was shared among all five of these populations. An average of 2,607  
427 heterozygous deleterious alleles (HeDA) was detected in *M. sinica*, ranging from 2,136 to 2,967.  
428 The highest number of HeDA was found in the XZQ population, which had a mean value of 2,593  
429 (2,136–2,967) (Table S25), while the lowest number of HeDA was found in the MAD population  
430 (2,430). The MAD population shared the highest HeDA with the MC population, and shared the  
431 lowest HeDA with XZQ. None of the HeDA was shared among all five of the populations (Table  
432 S25). The derived allele frequency (DAF) of approximately 32.35% of the deleterious mutations  
433 was < 0.05, and all these rare deleterious mutations were heterozygous. Only ~7.1% (1147/16131)  
434 of the deleterious mutations were homozygous (DAF > 0.05) (Figure S9).

435 At the population level, the mean value of FROH in *M. sinica* was  $0.11 \pm 0.04$ , ranging from  
436 0.08 to 0.16, with the lowest value found in the DLS population, and the highest value found in  
437 MAD. At the individual level, one individual (KIBDZL15801) from XZQ population showed the  
438 lowest levels of inbreeding, and had the lowest FROH value (0.06). The individual (KIBDZL15803)  
439 with the largest FROH value (0.21) was also found in XZQ population (Table S25).

440 GO analysis annotated many gene terms of deleterious mutations involved in the lipid

441 metabolism, lipid biosynthesis, lipid translocation, oxidation of lipid, lipid transport, membrane  
442 lipid biosynthetic, and galactolipid biosynthetic pathways. KEGG analysis also annotated some  
443 metabolic pathways of deleterious mutations related to lipids, including glycerolipid metabolism,  
444 sphingolipid metabolism, Steroid biosynthesis, alpha-Linolenic acid metabolism, and  
445 glycerophospholipid metabolism (Table S26, S27).

#### 446 4. DISCUSSION

447 To date, only three species in the Magnoliaceae (*Liriodendron chinense*, *Magnolia officinalis*  
448 and *M. biondii*) have been the objects of in-depth genomic research, and this has been mainly from  
449 the perspective of confirming the phylogeny of the angiosperms, investigation of species  
450 differentiation and the biosynthesis of terpenoids. To date, no species in the family Magnoliaceae  
451 have been studied at a genome-wide level from the perspective of conservation [36–38]. From the  
452 aspect of conservation genomics, we report high-quality whole-genomic data from *M. sinica* (1.84  
453 Gb with contigs N50 of ca. 45 Mb). This is superior to the data available from *Liriodendron chinense*  
454 (1.74 Gb with contigs N50 of ~1.43 Mb) [36], *Magnolia officinalis* (1.68 Gb, with contigs N50 of  
455 0.22 Mb) [38] and *M. biondii* (2.22 Gb with contigs N50 of 0.27 Mb) [37].

456 The early evolution of the core angiosperms has been studied with whole-genome analysis of  
457 certain species of Magnoliids and Chloranthales [37, 68, 106, 108–111]. However, the phylogenetic  
458 relationships between the Magnoliids on the early branch of the angiosperm lineage and the eudicots  
459 and monocots have been controversial and not fully resolved [110, 111]. Our genome level  
460 phylogenetic tree suggests that the magnolias form a sister group to the eudicots and the  
461 Ceratophyllales, while the monocots are sister to the other core angiosperms. This is consistent with  
462 the results of a study into Chloranthales [106, 110], but inconsistent with the relevant results of



463 *Magnolia biondii* and *M. officinalis* [37, 38]. The evolutionary history of the angiosperms was  
464 accompanied by frequent WGD events. However, evidence of WGD events was inferred from dot  
465 plots and  $K_s$ , which is insufficient to demonstrate whether any two species very close to  
466 differentiation share a WGD event. In our study, we concatenated homologous genes to construct a  
467 chromosome-level tree to make our inferences more reliable. Our inference results suggest that  
468 WGD events also occurred after the differentiation of the magnoliids from other groups, which is  
469 in agreement with other studies [111].

470 Genetic diversity is essential to allow species evolution in response to environmental changes,  
471 and has been predicted to be positively correlated with species fitness and evolutionary potential  
472 [112]. We found that *M. sinica* had relatively high genetic diversity, which is consistent with  
473 previous research based on SSR markers [45]. This high diversity could be explained by the fact  
474 that, as a tree species, *M. sinica* has a long life span (ca. 30 years). De Kort et al. (2021) [114]  
475 compared the genetic diversity of 164 annuals, 1,405 perennials, 308 shrubs and 2,337 trees, and  
476 found that although species level diversity is lower for long-lived or low-fecundity species than for  
477 short-lived or high-fecundity species, population level genetic diversity is usually higher for long-  
478 living plants, as they may respond more slowly to reduced gene flow. Another reason for this high  
479 diversity could be that *M. sinica* is found in southern subtropical monsoon broadleaved evergreen  
480 forests [44]. Species around the equator are expected to have higher population-level genetic  
481 diversity than other species. This is because in theoretical prediction analyses, the abundant  
482 precipitation around the equator shows a significant relative contribution to population genetic  
483 diversity, although the exact mechanisms and extent of this are still unknown [113]. Moreover, the  
484 pollinator-dependent pollination system may contribute to the high genetic diversity in *M. sinica*

485 [45].

486 *Magnolia sinica* has low genetic differentiation between subpopulations, which could be  
487 attributed to higher gene flow among subpopulations, despite the fragmented distribution of the  
488 species [45]. The species has an outcrossing mating system, which is pollinator dependent, and two  
489 species of beetles appear to be effective pollinators [44]. Previous research has demonstrated that  
490 some beetles can fly up to 12 km [114]. Long-distance pollen-mediated gene flow among  
491 populations may decrease population genetic differentiation [115]. The smaller FROH and lower  
492 inbreeding load in *M. sinica* compared with *Acer yangbiense* may also indicate the existence of  
493 certain gene flow among its isolated populations [107], or from other populations which we have  
494 not found. As most of the reported populations of *M. sinica* are found on the borders of China with  
495 other countries, it is not unreasonable to suggest that other unreported individuals or populations  
496 exist outside China.

497 Southeast Yunnan is an important biodiversity hotspot [116], and is shielded by Ailao Mountain  
498 from the climate fluctuations caused by glaciation and the uplift of the Himalayas and the Hengduan  
499 Mountains [117]. From the geological point of view, there is no evidence that Southeast Yunnan was  
500 affected by the Quaternary ice age, and simulations of climate data suggest that this area was not  
501 seriously affected by the global temperature drop [118]. In our results, Stairway plot2 detected major  
502 population declines, which is similar to the inferred demographic history of the sympatric *Magnolia*  
503 *fistulosa* [119]. Each *M. sinica* population decline inferred in the Stairway plot could be verified in  
504 PSMC (Figure 3c). However, the demographic history of *M. sinica* inferred by Stairway plot2 shows  
505 population rebound after each decline, which was not obvious in the PSMC analysis. Moreover, the  
506 Stairway plot can estimate very recent events, while PSMC estimates only up to 10,000 years ago

507 (Figure 3c). The earliest inferred population decline occurred 1.0–1.2 Ma, which is consistent with  
508 the mid-Pleistocene transition [120]. Population declines at a similar time are also reflected in other  
509 sympatric species such as *Acer yangbiense* [107], and *Buddleja alternifolia* [106]. The second  
510 population decline occurred at 0.3 Ma, during which global temperature experienced a general  
511 decline [121]. The latest population decline occurred at ca. 20 Ka, and may have been caused by the  
512 Last Glacial Maximum (19.0–26.5 Ka) [122]. Multiple population declines may have resulted in a  
513 narrow distribution of *M. sinica*, and the stable population sizes from about 1 ka inferred in the  
514 Stairway plot may be as a result of the very recent large-scale anthropogenic land development and  
515 land use changes in the habitat of *M. sinica*, and is likely to have been responsible for the extremely  
516 rare status of this species [26], this is also consistent with the characteristics of high genetic diversity  
517 and low genetic differentiation of this species.

518 The MAD population contains only a single remnant individual with a higher level of  
519 inbreeding (FROH = 0.16), lower heterozygosity rate (1.19%) and higher homozygous deleterious  
520 allele number (246) than other populations. Gene flow has been proposed as a potential strategy to  
521 sustain small and isolated populations, by masking of deleterious alleles [123]. We found that the  
522 DLS population had a higher heterozygosity rate (1.32%) and shared few homozygous deleterious  
523 mutations with the MAD population. The DLS population could therefore serve as source material  
524 for breeding, which could be used to mask homozygous deleterious mutations in MAD population.  
525 Methods such as population reinforcement, hand pollination to assist pollen flow (by collecting  
526 pollen from DLS population and pollinating the MAD population), or the transplantation of  
527 seedlings from the DLS population into MAD could be considered. Similarly, an individual  
528 (KIBDZL15801) in the XZQ population also had a higher heterozygosity rate (1.37%), and a

529 smaller number of HoDA (220). Pollen from KIBDZL15801 could therefore be used to assist gene  
530 flow to KIBDZL15803 and KIBDZL15807, two individuals with lower heterozygosity rates (1.12 %  
531 and 1.16 %, respectively) and higher numbers of HoDA (298 and 286, respectively).

532 Identification of a management unit (MU) is essential for the management of natural  
533 populations [124]. The FD population was genetically pure, and had no admixture with other  
534 populations even when  $K = 2$  and  $K = 3$ . This could be attributed to its distance from the other  
535 populations (about 66–145 km), which may decrease opportunities for pollen flow. Similarly,  
536 population XZQ was also found to be genetically pure at  $K = 2$  and  $K = 3$ . We therefore suggest that  
537 the FD and XZQ populations be treated as two separate evolutionarily significant units (ESU). The  
538 MAD and MC populations were genetically similar at all values of  $K$ , and we suggest that they be  
539 treated as another ESU. Importantly, however, the MAD and MC populations are found outside any  
540 existing nature reserves, and it is therefore necessary to include these populations in a nature reserve  
541 or to establish specific conservation regions to protect them.

542 The main threats currently faced by *Magnolia sinica* are as follows: (1) Substantial reduction  
543 and loss of the original habitats leading to severe habitat fragmentation and population isolation; (2)  
544 The large-scale planting of *Amomum tsaoko* under forest cover means that *M. sinica* is unable to  
545 regenerate naturally in the wild, and there are no seedlings; (3) Excessive artificial seed collection.  
546 Fortunately, since 2005, because this plant is a critically endangered flagship species,  
547 comprehensive scientific research, including reproductive and seed biology, conservation genetics,  
548 and protection measures including field investigations, *in situ* conservation, *ex situ* conservation,  
549 and reintroduction have been gradually implemented [14, 44, 46, 47, 49]. At present, in addition to  
550 the existing protection measures, strengthening of the management of nature reserves and reduction

551 of the disturbance by human activities in the original habitats of wild populations are urgently  
552 needed. In particular, it is necessary to stop the large-scale planting of commercial crops (*Amomum*  
553 *tsaoko*) under these forests, which is important to restore their natural regeneration in the wild.  
554 Unlike most of the severely threatened species, *M. sinica* has high genetic diversity and low genetic  
555 differentiation which is also consistent with research into other endangered species in the  
556 Magnoliaceae [119, 125–127]. However, considering that the generation time of *M. sinica* can be  
557 as long as 30 years, the isolation of the various populations, the serious habitat fragmentation, and  
558 that there are very few wild individuals, we still need to consider potential future inbreeding  
559 depression. More artificial outcrossing strategies should be designed in the future to reduce the loss  
560 of genetic diversity caused by inbreeding, and that these strategies should be considered instead of  
561 collecting seeds and simply breeding more individuals [25]. Our genomic study into *M. sinica*  
562 provides an example of high genetic diversity and low genetic differentiation in a long-lived tree  
563 species and informs the future formation and maintenance of conservation strategies necessary for  
564 the survival of such a PSESP.

565

#### 566 **Data availability statement**

567 The genome assembly, annotations, and other supporting data are available via the GigaScience  
568 database GigaDB. The raw sequence data have been deposited in the Short Read Archive under  
569 NCBI BioProject ID PRJNA774088.

#### 570 **Additional Files**

571 Figure S1. Evaluate the distribution of the coverage depth of the whole genome and BUSCO core  
572 gene region with the data of illumina and ont.

573 Figure S2. Kmer frequency distribution diagram.

574 Figure S3. The collinearity between *M. sinica* and *Liriodendron chinense*.

575 Figure S4. The collinearity between *M. sinica* and *Vitis vinifera*.

576 Figure S5. The collinearity between *Liriodendron chinense* and *Vitis vinifera*.

577 Figure S6. The collinearity between *Amborella trichopoda* and *M. sinica*.

578 Figure S7. The collinearity between *Nymphaea colorata* and *M. sinica*.

579 Figure S8. Cross validation error (CV) based on Admixture output.

580 Figure S9. Deleterious allele frequency distribution of homozygous deleterious SNPs. The density  
581 on the left of y axis is the number of alleles in a given allele frequency.

582 Table S1. Collection information of 21 re-sequenced samples of *Magnolia sinica*.

583 Table S2. Collection information of other eight Magnoliaceae samples for re-sequencing.

584 Table S3. WGS-ONT sequencing statics.

585 Table S4. WGS-Illumina sequencing statics.

586 Table S5. HiC sequencing statics.

587 Table S6. Iso-Seq sequencing statics.

588 Table S7. Assembly statics (V0.1).

589 Table S8. Assembly statics (V0.2).

590 Table S9. Assembly statics (V0.3).

591 Table S10. Assembly statics (V1.0).

592 Table S11. Assembly statics (V1.1).

593 Table S12. Statistics of all assemblies.

594 Table S13. The information of the chromosomes, scattered sequences, chloroplasts and

595 mitochondria.

596 Table S14. The mapping ratio and coverage percentage.

597 Table S15. Sequences used to construct ancestral sequences.

598 Table S16. The repetitive sequences statics.

599 Table S17. The final gene gff3 statics.

600 Table S18. Statistics of the source of integration annotation.

601 Table S19. Gene annotation statistics.

602 Table S20. Genome mapping statistics.

603 Table S21. Statistics of heterozygosity rate.

604 Table S22. Mean population fixation index and corresponding spatial distance.

605 Table S23. Genome wide diversity of woody speices.

606 Table S24. SIFT (Sorting Intolerant From Tolerant) prediction of deleterious mutations.

607 Table S25. Geneticl load of 21 individuals of Magnolia sinia.

608 Table S26. GO (gene ontology) enrichment of the deleterious mutations.

609 Table S27. KEGG pathway of the deleterious mutations.

610

## 611 **Abbreviations**

612 AED: annotation edit distance; Blast: Basic Local Alignment Search Tool; BUSCO: Benchmarking  
613 Universal Single-copy Orthologues; CBD COP 15: 15th Conference of the Parties, Convention on  
614 Biological Diversity; DAF: derived allele frequency; ESTs: Expressed sequence tags; FROH:  
615 frequency of runs of homozygosity; GO: gene ontology; HeDA: heterozygous deleterious alleles;  
616 HoDA: homozygous deleterious alleles; JBAT: Juicebox Assembly Tools; KBG : Kunming

617 Botanical Garden; KEGG: Kyoto Encyclopedia of Genes and Genomes; ONT: Oxford Nanopore  
618 Technologies; LAI: the LTR Assembly Index; LTR: long terminal repeat retrotransposons; MAF:  
619 minor allele frequency; PSESP: Plant Species with Extremely Small Populations; PSMC: Pairwise  
620 Sequentially Markovian Coalescent; ROH: runs of homozygosity;  $\theta_W$ : Watterson's theta;  $\theta\pi$ :  
621 nucleotide diversity; SFS: Site Frequency Spectrum; SIFT: Sorting Intolerant from Tolerant; SMRT:  
622 Single Molecule Real-Time; WGD: whole-genome duplication.

### 623 **Competing interests**

624 The authors declare no competing interests.

### 625 **Authors' contributions**

626 Y.P.M. and W.B.S. conceived and designed the study; R.G.Z., L.C., D.T.L. F.M.Y. and Q.Z.Y.  
627 analyzed the data; L.C., D.T.L. and F.M.Y. wrote the manuscript; Y.P.M., Z.L.D. and W.B. S. revised  
628 the manuscript. All authors reviewed and approved the final manuscript.

### 629 **Acknowledgements**

630 We thank Li-Dan Tao, Pin Zhang, Jia-Jun Yang, Rong-Li Liao for their help in collecting materials,  
631 and we thank Li-Sen Qian for helping to write the R script.

### 632 **Funding**

633 This work was supported by the National Science & Technology Basic Resources Investigation  
634 Program of China (Grant No. 2017FY100100); Yunnan Fundamental Research Projects (Grant No.  
635 202101AT070173); National Natural Science Foundation of China (NSFC) (Grant No. 32101407);  
636 and the National Natural Science Foundation of China (NSFC) – Yunnan Joint Fund (Grant No.  
637 U1302262).

638



639 **References**

- 640 1. Berry PM, Fabók V, Blicharska M, et al. Why conserve biodiversity? A multi-national  
641 exploration of stakeholders' views on the arguments for biodiversity conservation.  
642 *Biodivers Conserv.* 2018;**27**(7):1741–62. doi: 10.1007/s10531-016-1173-z.
- 643 2. Chen GS. Analysis on biodiversity conservation in the pluralistic vision. *Advanced*  
644 *Materials Research.* 2012;**518-523**:4980–4. doi: 10.4028/www.scientific.net/AMR.518-  
645 523.4980.
- 646 3. Isbell F, Gonzalez A, Loreau M, et al. Linking the influence and dependence of people on  
647 biodiversity across scales. *Nature.* 2017;**546**(7656):65–72. doi: 10.1038/nature22899.
- 648 4. Johnson CN, Balmford A, Brook BW, et al. Biodiversity losses and conservation responses  
649 in the Anthropocene. *Science.* 2017;**356**(6335):270–5. doi: 10.1126/science.aam9317.
- 650 5. Meng HH, Zhou SS, Li L, et al. Conflict between biodiversity conservation and economic  
651 growth: insight into rare plants in tropical China. *Biodivers Conserv.* 2019;**28**(2):523–37.  
652 doi: 10.1007/s10531-018-1661-4.
- 653 6. Wang W, Feng CT, Liu FZ, et al. Biodiversity conservation in China: A review of recent  
654 studies and practices. *Environ Sci Ecotech.* 2020;**2**:100025. doi: 10.1016/j.esec.2020.100025.
- 655 7. Zhang YZ, Qian LS, Spalink D, et al. Spatial phylogenetics of two topographic extremes  
656 of the Hengduan Mountains in southwestern China and its implications for biodiversity  
657 conservation. *Plant Divers.* 2021;**43**(3):181–91. doi: 10.1016/j.pld.2020.09.001.
- 658 8. McBeath J and McBeath† JH. Biodiversity conservation in China: policies and practice. *J.*  
659 *Int. Wildl. Law Policy.* 2006;**9**(4):293–317. doi: 10.1080/13880290601039238.
- 660 9. Xu Jc and Wilkes A. Biodiversity impact analysis in northwest Yunnan, southwest China.

- 661 *Biodivers Conserv.* 2004;**13**(5):959–83. doi: 10.1023/B:BIOC.0000014464.80847.02.
- 662 10. Wyse Jackson P and Kennedy K. The Global Strategy for Plant Conservation: a challenge  
663 and opportunity for the international community. *Trends Plant Sci.* 2009;**14**(11):578–80.  
664 doi: 10.1016/j.tplants.2009.08.011.
- 665 11. López-Pujol J, Zhang FM and Ge S. Plant biodiversity in China: richly varied, endangered,  
666 and in need of conservation. *Biodivers Conserv.* 2006;**15**(12):3983–4026. doi:  
667 10.1007/s10531-005-3015-2.
- 668 12. Ma YP, Chen G, Grumbine RE, et al. Conserving plant species with extremely small  
669 populations (PSESP) in China. *Biodivers Conserv.* 2013;**22**(3):803–9. doi:  
670 10.1007/s10531-013-0434-3.
- 671 13. Sun WB, Ma YP and Blackmore S. How a new conservation action concept has accelerated  
672 plant conservation in China. *Trends Plant Sci.* 2019;**24**(1):4–6. doi:  
673 10.1016/j.tplants.2018.10.009.
- 674 14. Sun WB, Yang J and Dao ZL. Study and Conservation of Plant Species with Extremely  
675 Small Populations (PSESP) in Yunnan Province, China. Beijing: Science Press; 2019.
- 676 15. Yang J, Cai L, Liu DT, et al. China's conservation program on Plant Species with Extremely  
677 Small Populations (PSESP): Progress and perspectives. *Biol Conserv.* 2020;**244**:108535.  
678 doi: 10.1016/j.biocon.2020.108535.
- 679 16. Sun WB. List of Yunnan Protected Plant Species with Extremely Small Populations (2021).  
680 Kunming: Yunnan Science and Technology Press; 2021.
- 681 17. Marks RA, Hotaling S, Frandsen PB, et al. Representation and participation across 20 years  
682 of plant genome sequencing. *Nat Plants.* 2021;**7**(12):1571–8. doi: 10.1038/s41477-021-

- 683 01031-8.
- 684 18. Zanini SF, Bayer PE, Wells R, et al. Pangenomics in crop improvement—from coding  
685 structural variations to finding regulatory variants with pangenome graphs. *Plant Genome*.  
686 2022;**15**(1):e20177. doi: 10.1002/tpg2.20177.
- 687 19. Chen Y, Ma T, Zhang LS, et al. Genomic analyses of a “living fossil”: The endangered  
688 dove-tree. *Mol Ecol Resour*. 2020;**20**(3):756–69. doi: 10.1111/1755-0998.13138.
- 689 20. Ding XP, Mei WL, Huang SZ, et al. Genome survey sequencing for the characterization of  
690 genetic background of *Dracaena cambodiana* and its defense response during dragon’s  
691 blood formation. *PLoS One*. 2018;**13**(12):e0209258. doi: 10.1371/journal.pone.0209258.
- 692 21. Liu HL, Wang XB, Wang GB, et al. The nearly complete genome of *Ginkgo biloba*  
693 illuminates gymnosperm evolution. *Nat Plants*. 2021;**7**(6):748–56. doi: 10.1038/s41477-  
694 021-00933-x.
- 695 22. Ma H, Liu YB, Liu DT, et al. Chromosome-level genome assembly and population genetic  
696 analysis of a critically endangered rhododendron provide insights into its conservation.  
697 *Plant J*. 2021;**107**(5):1533–45. doi: 10.1111/tpj.15399.
- 698 23. Rodríguez del Río Á, Minoche AE, Zwickl NF, et al. Genomes of the wild beets *Beta patula*  
699 and *Beta vulgaris* ssp. *maritima*. *Plant J*. 2019;**99**(6):1242–53. doi: 10.1111/tpj.14413.
- 700 24. Sun YX, Deng T, Zhang AD, et al. Genome sequencing of the endangered *Kingdonia*  
701 *uniflora* (Circaceasteraceae, Ranunculales) reveals potential mechanisms of evolutionary  
702 specialization. *iScience*. 2020;**23**(5):101124. doi: 10.1016/j.isci.2020.101124.
- 703 25. Yang YZ, Ma T, Wang ZF, et al. Genomic effects of population collapse in a critically  
704 endangered ironwood tree *Ostrya rehderiana*. *Nat Commun*. 2018;**9**(1):5449. doi:

- 705 10.1038/s41467-018-07913-4.
- 706 26. Yang J, Wariss HM, Tao LD, et al. *De novo* genome assembly of the endangered *Acer*  
707 *yangbiense*, a plant species with extremely small populations endemic to Yunnan Province,  
708 China. *GigaScience*. 2019;**8**(7):giz085. doi: 10.1093/gigascience/giz085.
- 709 27. Xu B, Liao M, Deng HN, et al. Chromosome-level *de novo* genome assembly and whole-  
710 genome resequencing of the threatened species *Acanthochlamys bracteata* (Velloziaceae)  
711 provide insights into alpine plant divergence in a biodiversity hotspot. *Mol Ecol Resour*.  
712 2022;**22**(4):1582–95. doi: 10.1111/1755-0998.13562.
- 713 28. Zhu SS, Chen J, Zhao J, et al. Genomic insights on the contribution of balancing selection  
714 and local adaptation to the long-term survival of a widespread living fossil tree,  
715 *Cercidiphyllum japonicum*. *New Phytol*. 2020;**228**(5):1674–89. doi: 10.1111/nph.16798.
- 716 29. Dong SS, Wang YL, Xia NH, et al. Plastid and nuclear phylogenomic incongruences and  
717 biogeographic implications of *Magnolia* s.l. (Magnoliaceae). *J Syst Evol*. 2022;**60**(1):1–15.  
718 doi: 10.1111/jse.12727.
- 719 30. Wang YB, Liu BB, Nie ZL, et al. Major clades and a revised classification of *Magnolia* and  
720 Magnoliaceae based on whole plastid genome sequences via genome skimming. *J Syst Evol*.  
721 2020;**58**(5):673–95. doi: 10.1111/jse.12588.
- 722 31. Azuma H, García-Franco JG, Rico-Gray V, et al. Molecular phylogeny of the Magnoliaceae:  
723 the biogeography of tropical and temperate disjunctions. *Am J Bot*. 2001;**88**(12):2275–85.  
724 doi: 10.2307/3558389.
- 725 32. Figlar RB and Nootboom HP. Notes on Magnoliaceae IV. *Blumea-Biodiversity, Evolution*  
726 *and Biogeography of Plants*. 2004;**49**(1):87–100. doi: 10.3767/000651904X486214.

- 727 33. Rivers M, Beech E, Murphy L, et al. The red list of Magnoliaceae-revised and extended.  
728 Richmond: Botanic Gardens Conservation International; 2016.
- 729 34. Xia NH, Liu YH, Nootboom HP. Magnoliaceae. In: Wu ZY, Raven PH , editors. *Flora of*  
730 *China*, Vol. 7. Beijing: Science Press & St. Louis: Missouri Botanical Garden Press; 2008.  
731 p. 48–91.
- 732 35. Qin HN, Yang Y, Dong SY, et al. Threatened species list of China’s higher plants. *Biodiv*  
733 *Sci.* 2017;**25**(7):696–744. doi: 10.17520/biods.2017144.
- 734 36. Chen JH, Hao ZD, Guang XM, et al. *Liriodendron* genome sheds light on angiosperm  
735 phylogeny and species–pair differentiation. *Nat Plants.* 2019;**5**:18–25. doi:  
736 10.1038/s41477-018-0323-6.
- 737 37. Dong SS, Liu M, Liu Y, et al. The genome of *Magnolia biondii* Pamp. provides insights  
738 into the evolution of Magnoliales and biosynthesis of terpenoids. *Hortic Res.* 2021;**8**:38.  
739 doi: 10.1038/s41438-021-00471-9.
- 740 38. Yin YP, Peng F, Zhou LJ, et al. The chromosome-scale genome of *Magnolia officinalis*  
741 provides insight into the evolutionary position of magnoliids. *iScience.* 2021;**24**(9):102997.  
742 doi: 10.1016/j.isci.2021.102997.
- 743 39. Yuh-wu L. A new genus of Magnoliaceae from China. *J Syst Evol.* 1979;**17**:72–4.
- 744 40. Sun WB, Zhou Y, Li XY, et al. Population reinforcing program for *Magnolia sinica*, a  
745 critically endangered endemic tree in southeast Yunnan province, China. In: Maschinski J  
746 and Haskins KE, editors. *Plant Reintroduction in a Changing Climate*. Washington: Island  
747 Press; 2012. p. 65–69.
- 748 41. Wang S and Xie Y. *China Species Red List (Vol 1)*. Beijing: Higher Education Press; 2004.

- 749 42. Cicuzza D, Newton A and Oldfield S. The red list of Magnoliaceae. Cambridge: Lavenham  
750 Press; 2007.
- 751 43. Anon. List of National Key Protected Wild Plants (First Group). *The Order of National*  
752 *Forestry Bureau and Agriculture Ministry of China* 4, 2–13.
- 753 44. Chen Y, Chen G, Yang J, et al. Reproductive biology of *Magnolia sinica* (Magnoliaceae),  
754 a threatened species with extremely small populations in Yunnan, China. *Plant Divers.*  
755 2016;**38**(5):253–8. doi: 10.1016/j.pld.2016.09.003.
- 756 45. Chen Y. Conservation biology of *Manglietiastrum sinicum* Law (Magnoliaceae), a plant  
757 species with extremely small populations. University of Chinese Academy of Sciences;  
758 2017.
- 759 46. Lin L, Cai L, Fan L, et al. Seed dormancy, germination and storage behavior of *Magnolia*  
760 *sinica*, a plant species with extremely small populations of Magnoliaceae. *Plant Divers.*  
761 2022;**44**(1):94–100. doi: 10.1016/j.pld.2021.06.009.
- 762 47. Song EJ, Park S, Sun WB, et al. Complete chloroplast genome sequence of *Magnolia sinica*  
763 (Y.W.Law) Noot. (magnoliaceae), A critically endangered species with extremely small  
764 populations in Magnoliaceae. *Mitochondrial DNA B.* 2019;**4**(1):242–3. doi:  
765 10.1080/23802359.2018.1546141.
- 766 48. Su DF, Shen QQ, Yang JY, et al. Comparison of the bulk and rhizosphere soil prokaryotic  
767 communities between wild and reintroduced *Manglietiastrum sinicum* plants, a threatened  
768 species with extremely small populations. *Curr Microbiol.* 2021;**78**(11):3877–90. doi:  
769 10.1007/s00284-021-02653-z.
- 770 49. Wang B, Ma YP, Chen G, et al. Rescuing *Magnolia sinica* (Magnoliaceae), a Critically

- 771           Endangered species endemic to Yunnan, China. *Oryx*. 2016;**50**(3):446–9. doi:  
772           10.1017/S0030605315000435.
- 773   50.       Doyle JJ and Doyle JL. A rapid DNA isolation procedure for small quantities of fresh leaf  
774       tissue. *Phytochem. bull.* 1987;**19**(1):11–5.
- 775   51.       Gonzalez-Garay ML. Introduction to isoform sequencing using pacific biosciences  
776       technology (Iso-Seq). In: Wu JQ, editor. Transcriptomics and Gene Regulation. Dordrecht:  
777       Springer Netherlands; 2016. p. 141–60.
- 778   52.       Myers EW, Sutton GG, Delcher AL, et al. A whole-genome assembly of *Drosophila*.  
779       *Science*. 2000;**287**(5461):2196–204. doi: 10.1126/science.287.5461.2196.
- 780   53.       Walker BJ, Abeel T, Shea T, et al. Pilon: an integrated tool for comprehensive microbial  
781       variant detection and genome assembly improvement. *PLoS One*. 2014;**9**(11):e112963. doi:  
782       10.1371/journal.pone.0112963.
- 783   54.       Chakraborty M, Baldwin-Brown JG, Long AD, et al. Contiguous and accurate *de novo*  
784       assembly of metazoan genomes with modest long read coverage. *Nucleic Acids Res.*  
785       2016;**44**(19):e147–e. doi: 10.1093/nar/gkw654.
- 786   55.       Jin JJ, Yu WB, Yang JB, et al. GetOrganelle: a fast and versatile toolkit for accurate *de novo*  
787       assembly of organelle genomes. *Genome Biol.* 2020;**21**(1):241. doi: 10.1186/s13059-020-  
788       02154-5.
- 789   56.       Dudchenko O, Batra SS, Omer AD, et al. *De novo* assembly of the *Aedes aegypti* genome  
790       using Hi-C yields chromosome-length scaffolds. *Science*. 2017;**356**(6333):92–5. doi:  
791       10.1126/science.aal3327.
- 792   57.       Durand NC, Shamim MS, Machol I, et al. Juicer provides a One-Click system for analyzing

793 loop-resolution Hi-C experiments. *Cell Syst.* 2016;**3**(1):95–8. doi:  
794 10.1016/j.cels.2016.07.002.

795 58. Durand NC, Robinson JT, Shamim MS, et al. Juicebox provides a visualization system for  
796 Hi-C contact maps with unlimited zoom. *Cell Syst.* 2016;**3**(1):99–101. doi:  
797 10.1016/j.cels.2015.07.012.

798 59. Hu J, Fan JP, Sun ZY, et al. NextPolish: a fast and efficient genome polishing tool for long-  
799 read assembly. *Bioinformatics.* 2019;**36**(7):2253–5. doi: 10.1093/bioinformatics/btz891.

800 60. Xu GC, Xu TJ, Zhu R, et al. LR\_Gapcloser: a tiling path-based gap closer that uses long  
801 reads to complete genome assembly. *GigaScience.* 2018;**8**(1):giy157. doi:  
802 10.1093/gigascience/giy157.

803 61. Pryszcz LP and Gabaldón T. Redundans: an assembly pipeline for highly heterozygous  
804 genomes. *Nucleic Acids Res.* 2016;**44**(12):e113. doi: 10.1093/nar/gkw294.

805 62. Simão FA, Waterhouse RM, Ioannidis P, et al. BUSCO: assessing genome assembly and  
806 annotation completeness with single-copy orthologs. *Bioinformatics.* 2015;**31**(19):3210–2.  
807 doi: 10.1093/bioinformatics/btv351.

808 63. Li H. Aligning sequence reads, clone sequences and assembly contigs with BWA-MEM.  
809 *ArXiv.* 2013:1303.3997. doi: 10.48550/arXiv.1303.3997.

810 64. Ou SJ and Jiang N. LTR\_retriever: a highly accurate and sensitive program for  
811 identification of long terminal repeat retrotransposons. *Plant Physiol.* 2018;**176**(2):1410–  
812 22. doi: 10.1104/pp.17.01310.

813 65. Li H, Handsaker B, Wysoker A, et al. The Sequence Alignment/Map format and SAMtools.  
814 *Bioinformatics.* 2009;**25**(16):2078–9. doi: 10.1093/bioinformatics/btp352.



- 815 66. Haas BJ, Delcher AL, Mount SM, et al. Improving the *Arabidopsis* genome annotation  
816 using maximal transcript alignment assemblies. *Nucleic Acids Res.* 2003;**31**(19):5654–66.  
817 doi: 10.1093/nar/gkg770.
- 818 67. Stanke M, Diekhans M, Baertsch R, et al. Using native and syntenically mapped cDNA  
819 alignments to improve *de novo* gene finding. *Bioinformatics.* 2008;**24**(5):637–44. doi:  
820 10.1093/bioinformatics/btn013.
- 821 68. Chaw SM, Liu YC, Wu YW, et al. Stout camphor tree genome fills gaps in understanding  
822 of flowering plant genome evolution. *Nat Plants.* 2019;**5**(1):63–73. doi: 10.1038/s41477-  
823 018-0337-0.
- 824 69. Soltis DE and Soltis PS. Nuclear genomes of two magnoliids. *Nat Plants.* 2019;**5**(1):6–7.  
825 doi: 10.1038/s41477-018-0344-1.
- 826 70. Hu LS, Xu ZP, Wang MJ, et al. The chromosome-scale reference genome of black pepper  
827 provides insight into piperine biosynthesis. *Nat Commun.* 2019;**10**(1):4702. doi:  
828 10.1038/s41467-019-12607-6.
- 829 71. Albert VA, Barbazuk WB, dePamphilis CW, et al. The *Amborella* genome and the evolution  
830 of flowering plants. *Science.* 2013;**342**(6165):1241089. doi: 10.1126/science.1241089.
- 831 72. The Arabidopsis Genome Initiative. Analysis of the genome sequence of the flowering  
832 plant *Arabidopsis thaliana*. *Nature.* 2000;**408**(6814):796–815. doi:10.1038/35048692.
- 833 73. Cantarel BL, Korf I, Robb SM, et al. MAKER: an easy-to-use annotation pipeline designed  
834 for emerging model organism genomes. *Genome Res.* 2008;**18**(1):188–96. doi:  
835 10.1101/gr.6743907.
- 836 74. Slater GSC and Birney E. Automated generation of heuristics for biological sequence

837 comparison. *Bmc Bioinformatics*. 2005;**6**(1):31. doi: 10.1186/1471-2105-6-31.

838 75. Lowe TM and Eddy SR. tRNAscan-SE: a program for improved detection of transfer RNA  
839 genes in genomic sequence. *Nucleic Acids Res*. 1997;**25**(5):955–64. doi:  
840 10.1093/nar/25.5.955.

841 76. Huerta-Cepas J, Forslund K, Coelho LP, et al. Fast genome-wide functional annotation  
842 through orthology assignment by eggNOG-Mapper. *Mol Biol Evol*. 2017;**34**(8):2115–22.  
843 doi: 10.1093/molbev/msx148.

844 77. Buchfink B, Xie C and Huson DH. Fast and sensitive protein alignment using DIAMOND.  
845 *Nat Methods*. 2015;**12**(1):59–60. doi:10.1038/nmeth.3176.

846 78. Jones P, Binns D, Chang H-Y, et al. InterProScan5: genome-scale protein function  
847 classification. *Bioinformatics*. 2014;**30**(9):1236–40. doi: 10.1093/bioinformatics/btu031.

848 79. Emms DM and Kelly S. OrthoFinder: phylogenetic orthology inference for comparative  
849 genomics. *Genome Biol*. 2019;**20**(1):238. doi: 10.1186/s13059-019-1832-y.

850 80. Nguyen L-T, Schmidt HA, von Haeseler A, et al. IQ-TREE: a fast and effective stochastic  
851 algorithm for estimating maximum-likelihood phylogenies. *Mol Biol Evol*.  
852 2015;**32**(1):268–74. doi: 10.1093/molbev/msu300.

853 81. Yang ZH. PAML 4: phylogenetic analysis by maximum likelihood. *Mol Biol Evol*.  
854 2007;**24**(8):1586–91. doi: 10.1093/molbev/msm088.

855 82. Li HT, Yi TS, Gao LM, et al. Origin of angiosperms and the puzzle of the Jurassic gap. *Nat*  
856 *Plants*. 2019;**5**(5):461–70. doi: 10.1038/s41477-019-0421-0.

857 83. Magallón S, Gómez-Acevedo S, Sánchez-Reyes LL, et al. A metacalibrated time-tree  
858 documents the early rise of flowering plant phylogenetic diversity. *New Phytol*.

859 2015;**207**(2):437–53. doi: 10.1111/nph.13264.

860 84. Hahn MW, De Bie T, Stajich JE, et al. Estimating the tempo and mode of gene family  
861 evolution from comparative genomic data. *Genome Res.* 2005;**15**(8):1153–60. doi:  
862 10.1101/gr.3567505.

863 85. Wang YP, Tang HB, DeBarry JD, et al. MCScanX: a toolkit for detection and evolutionary  
864 analysis of gene synteny and collinearity. *Nucleic Acids Res.* 2012;**40**(7):e49. doi:  
865 10.1093/nar/gkr1293.

866 86. Edgar RC. MUSCLE: multiple sequence alignment with high accuracy and high throughput.  
867 *Nucleic Acids Res.* 2004;**32**(5):1792–7. doi: 10.1093/nar/gkh340.

868 87. Suyama M, Torrents D and Bork P. PAL2NAL: robust conversion of protein sequence  
869 alignments into the corresponding codon alignments. *Nucleic Acids Res.*  
870 2006;**34**(suppl\_2):609–12. doi: 10.1093/nar/gkl315.

871 88. Yang ZH and Nielsen R. Estimating synonymous and nonsynonymous substitution rates  
872 under realistic evolutionary models. *Mol Biol Evol.* 2000;**17**(1):32–43. doi:  
873 10.1093/oxfordjournals.molbev.a026236.

874 89. Zhang Z, Li J, Zhao XQ, et al. KaKs\_Calculator: calculating Ka and Ks through model  
875 selection and model averaging. *Genom Proteom Bioinf.* 2006;**4**(4):259–63. doi:  
876 10.1016/S1672-0229(07)60007-2.

877 90. Chen SF, Zhou YQ, Chen YR, et al. Fastp: an ultra-fast all-in-one FASTQ preprocessor.  
878 *Bioinformatics.* 2018;**34**(17):884–90. doi: 10.1093/bioinformatics/bty560.

879 91. Garrison E and Marth G. Haplotype-based variant detection from short-read sequencing.  
880 *ArXiv.* 2012:1207.3907. doi: 10.48550/arXiv.1207.3907.

- 881 92. Danecek P, Auton A, Abecasis G, et al. The variant call format and VCFtools.  
882 *Bioinformatics*. 2011;**27**(15):2156–8. doi: 10.1093/bioinformatics/btr330.
- 883 93. Korneliussen TS, Albrechtsen A and Nielsen R. ANGSD: analysis of next generation  
884 sequencing data. *Bmc Bioinformatics*. 2014;**15**(1):356. doi: 10.1186/s12859-014-0356-4.
- 885 94. Watterson GA. On the number of segregating sites in genetical models without  
886 recombination. *Theor Popul Biol*. 1975;**7**(2):256–76. doi: 10.1016/0040-5809(75)90020-9.
- 887 95. Tajima F. Statistical method for testing the neutral mutation hypothesis by DNA  
888 polymorphism. *Genetics*. 1989;**123**(3):585–95. doi: 10.1093/genetics/123.3.585.
- 889 96. Fu YX and Li WH. Statistical tests of neutrality of mutations. *Genetics*. 1993;**133**(3):693–  
890 709. doi: 10.1093/genetics/133.3.693.
- 891 97. Purcell S, Neale B, Todd-Brown K, et al. PLINK: a tool set for whole-genome association  
892 and population-based linkage analyses. *Am J Hum Genet*. 2007;**81**(3):559–75. doi:  
893 10.1086/519795.
- 894 98. Alexander DH, Novembre J and Lange K. Fast model-based estimation of ancestry in  
895 unrelated individuals. *Genome Res*. 2009;**19**(9):1655–64. doi: 10.1101/gr.094052.109.
- 896 99. Liu XM and Fu YX. Stairway Plot 2: demographic history inference with folded SNP  
897 frequency spectra. *Genome Biol*. 2020;**21**(1):280. doi: 10.1186/s13059-020-02196-9.
- 898 100. Li H and Durbin R. Inference of human population history from individual whole-genome  
899 sequences. *Nature*. 2011;**475**(7357):493–6. doi: 10.1038/nature10231.
- 900 101. Do C, Waples RS, Peel D, et al. NeEstimator v2: re-implementation of software for the  
901 estimation of contemporary effective population size (Ne) from genetic data. *Mol Ecol*  
902 *Resour*. 2014;**14**(1):209–14. doi: 10.1111/1755-0998.12157.

- 903 102. Sim N-L, Kumar P, Hu J, et al. SIFT web server: predicting effects of amino acid  
904 substitutions on proteins. *Nucleic Acids Res.* 2012;**40**(W1):452–7. doi: 10.1093/nar/gks539.
- 905 103. Boeckmann B, Bairoch A, Apweiler R, et al. The SWISS-PROT protein knowledgebase  
906 and its supplement TrEMBL in 2003. *Nucleic Acids Res.* 2003;**31**(1):365–70. doi:  
907 10.1093/nar/gkg095.
- 908 104. Bortoluzzi C, Bosse M, Derks MFL, et al. The type of bottleneck matters: Insights into the  
909 deleterious variation landscape of small managed populations. *Evol Appl.* 2020;**13**(2):330–  
910 41. doi: 10.1111/eva.12872.
- 911 105. Kirin M, McQuillan R, Franklin CS, et al. Genomic Runs of Homozygosity record  
912 population history and consanguinity. *PLoS One.* 2010;**5**(11):e13996. doi:  
913 10.1371/journal.pone.0013996.
- 914 106. Ma YP, Wariss HM, Liao RL, et al. Genome-wide analysis of butterfly bush (*Buddleja*  
915 *alternifolia*) in three uplands provides insights into biogeography, demography and  
916 speciation. *New Phytol.* 2021;**232**(3):1463–76. doi: 10.1111/nph.17637.
- 917 107. Ma YP, Liu DT, Wariss HM, et al. Demographic history and identification of threats  
918 revealed by population genomic analysis provide insights into conservation for an  
919 endangered maple. *Mol Ecol.* 2022;**31**(3):767–79. doi: 10.1111/mec.16289.
- 920 108. Chen YC, Li Z, Zhao YX, et al. The *Litsea* genome and the evolution of the laurel family.  
921 *Nat Commun.* 2020;**11**(1):1675. doi: 10.1038/s41467-020-15493-5.
- 922 109. Chen SP, Sun WH, Xiong YF, et al. The *Phoebe* genome sheds light on the evolution of  
923 magnoliids. *Hortic Res.* 2020;**7**:146. doi: 10.1038/s41438-020-00368-z.
- 924 110. Guo X, Fang DM, Sahu SK, et al. *Chloranthus* genome provides insights into the early

- 925 diversification of angiosperms. *Nat Commun.* 2021;**12**(1):6930. doi: 10.1038/s41467-021-  
926 26922-4.
- 927 111. Qin LY, Hu YH, Wang JP, et al. Insights into angiosperm evolution, floral development and  
928 chemical biosynthesis from the *Aristolochia fimbriata* genome. *Nat Plants.*  
929 2021;**7**(9):1239–53. doi: 10.1038/s41477-021-00990-2.
- 930 112. Reed DH and Frankham R. Correlation between fitness and genetic diversity. *Conserv Biol.*  
931 2003;**17**(1):230–7. doi: 10.1046/j.1523-1739.2003.01236.x.
- 932 113. De Kort H, Prunier JG, Ducatez S, et al. Life history, climate and biogeography  
933 interactively affect worldwide genetic diversity of plant and animal populations. *Nat*  
934 *Commun.* 2021;**12**(1):516. doi: 10.1038/s41467-021-20958-2.
- 935 114. Lessio F, Pisa CG, Picciau L, et al. An immunomarking method to investigate the flight  
936 distance of the Japanese beetle. *Entomol Gen.* 2022;**42**(1):45–56. doi:  
937 10.1127/entomologia/2021/1117.
- 938 115. Gamba D and Muchhala N. Global patterns of population genetic differentiation in seed  
939 plants. *Mol Ecol.* 2020;**29**(18):3413–28. doi: 10.1111/mec.15575.
- 940 116. Li R and Yue J. A phylogenetic perspective on the evolutionary processes of floristic  
941 assemblages within a biodiversity hotspot in eastern Asia. *J Syst Evol.* 2020;**58**(4):413–22.  
942 doi: 10.1111/jse.12539.
- 943 117. Zhang KY. A preliminary study on the climatic characteristic and the formation factors in  
944 southern Yunnan. *Acta Meteorol Sin.* 1963;**33**(2):218–230.
- 945 118. Qian H and Ricklefs RE. Diversity of temperate plants in east Asia. *Nature.*  
946 2001;**413**(6852):130–. doi: 10.1038/35093169.

- 947 119. Yang FM, Cai L, Dao ZL, et al. Genomic data reveals population genetic and demographic  
948 history of *Magnolia fistulosa* (Magnoliaceae), a Plant Species With Extremely Small  
949 Populations in Yunnan Province, China. *Front Plant Sci.* 2022;**13**:811312. doi:  
950 10.3389/fpls.2022.811312.
- 951 120. Clark PU, Archer D, Pollard D, et al. The middle Pleistocene transition: characteristics,  
952 mechanisms, and implications for long-term changes in atmospheric pCO<sub>2</sub>. *Quat Sci Rev.*  
953 2006;**25**(23):3150–84. doi: 10.1016/j.quascirev.2006.07.008.
- 954 121. Sun YB and An ZS. Late Pliocene-Pleistocene changes in mass accumulation rates of eolian  
955 deposits on the central Chinese Loess Plateau. *J Geophys Res-Atmos.*  
956 2005;**110**(D23):D23101. doi: 10.1029/2005JD006064.
- 957 122. Clark PU, Dyke AS, Shakun JD, et al. The Last Glacial Maximum. *Science.*  
958 2009;**325**(5941):710–4. doi: 10.1126/science.1172873.
- 959 123. Khan A, Patel K, Shukla H, et al. Genomic evidence for inbreeding depression and purging  
960 of deleterious genetic variation in Indian tigers. *Proc Natl Acad Sci.*  
961 2021;**118**(49):e2023018118. doi: 10.1073/pnas.2023018118.
- 962 124. Palsbøll PJ, Bérubé M and Allendorf FW. Identification of management units using  
963 population genetic data. *Trends Ecol Evol.* 2007;**22**(1):11–6. doi:  
964 10.1016/j.tree.2006.09.003.
- 965 125. Deng YW, Liu TT, Xie YQ, et al. High genetic diversity and low differentiation in *Michelia*  
966 *shiluensis*, an Endangered magnolia species in South China. *Forests.* 2020;**11**(4):469. doi:  
967 10.3390/f11040469.
- 968 126. Yu HH, Yang ZL, Sun B, et al. Genetic diversity and relationship of endangered plant

969 *Magnolia officinalis* (Magnoliaceae) assessed with ISSR polymorphisms. *Biochem Syst*  
970 *Ecol.* 2011;**39**(2):71–8. doi: 10.1016/j.bse.2010.12.003.

971 127. Zhao XF, Ma YP, Sun WB, et al. High genetic diversity and low differentiation of *Michelia*  
972 *coriacea* (Magnoliaceae), a critically endangered endemic in southeast Yunnan, China. *Int*  
973 *J Mol Sci.* 2012;**13**(4):4396–411. doi: 10.3390/ijms13044396.

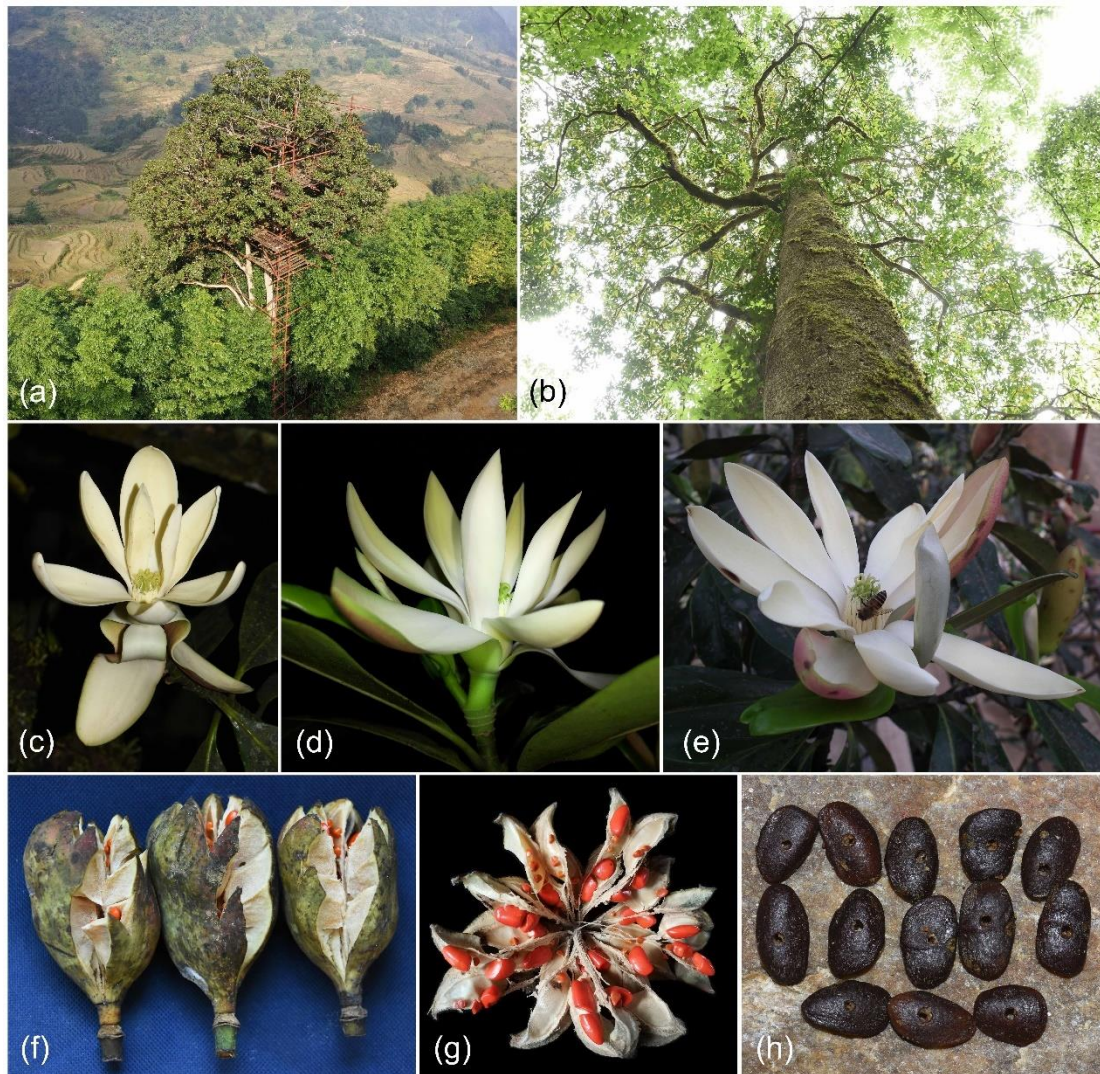

974  
975 **FIGURE 1** Habitat and morphological characters of *Magnolia sinica*. (a) Habitat. (b) Habit. (c-e)  
976 Flowers. (f) Fruits. (g) Fruit completely opened. (h) Seeds without testa.



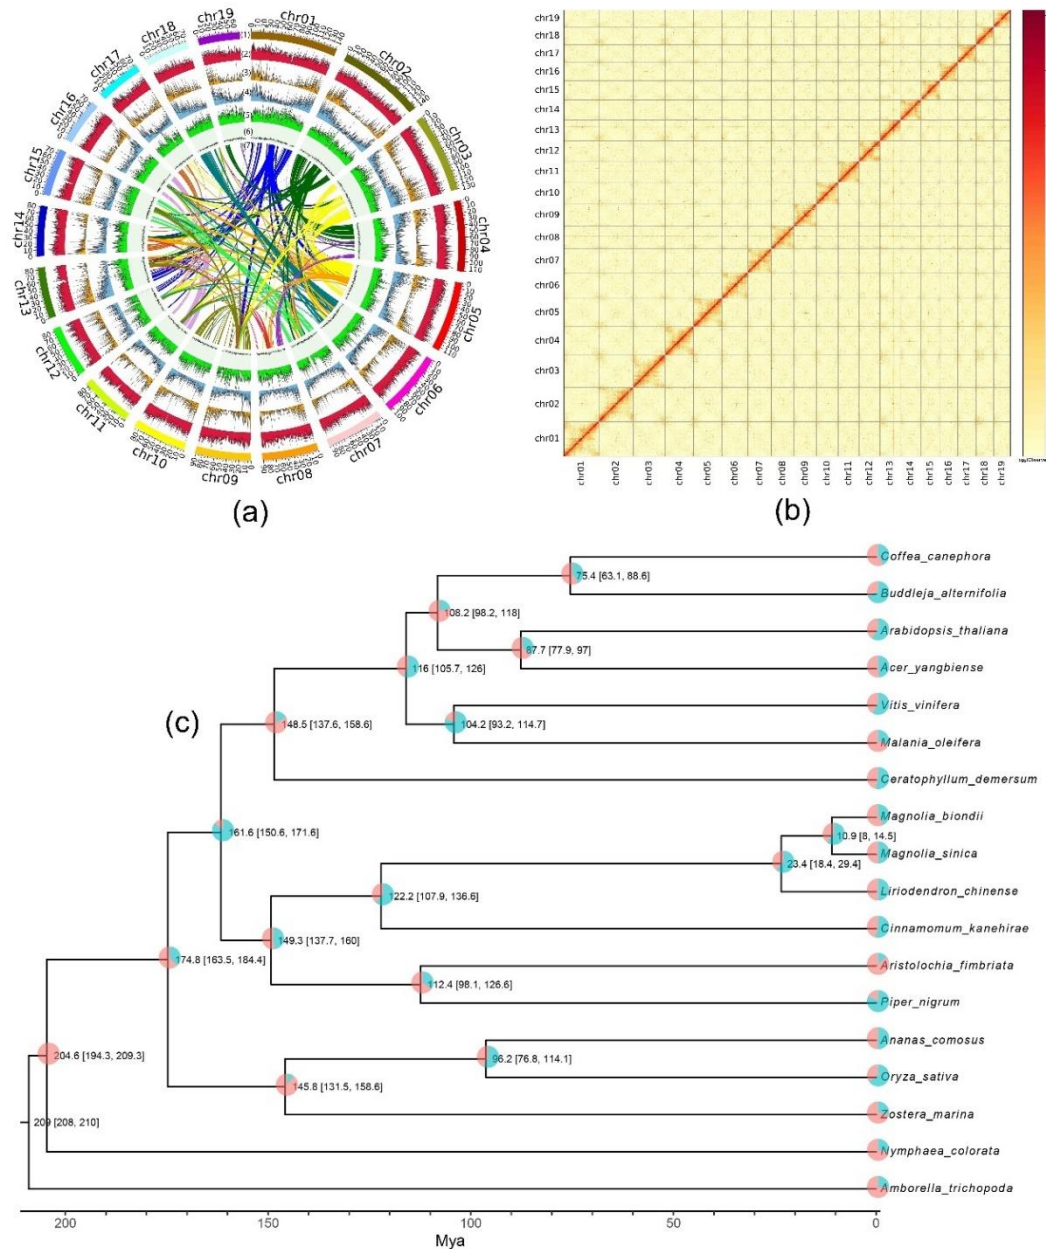

977

978 **FIGURE 2** Genomic landscape of *Magnolia sinica* chromosomes, Hi-C heatmap and related

979 phylogenetic tree. **(a)** The genome features across 19 chromosomes of *M. sinica*. (1) 19

980 pseudochromosomes. (2) Class I transposable element (TE) density (long terminal repeats, LTRs,

981 long and short interspersed nuclear elements). (3) Class II TE (DNA and Heliron) density. (4)

982 Coding gene (messenger RNA) density. (5) The density of single-nucleotide polymorphism (SNP)

983 loci. (6) GC content. (7) collinear blocks. **(b)** Hi-C interaction heatmap for the *M. sinica* genome

984 showing interactions among 19 chromosomes. **(c)** The phylogenetic tree of 18 species showing the

985 proportions of the gene families that contracted and expanded (pink: contracted; blue-green:  
 986 expanded; Values at the nodes represent the time of differentiation and 95 % CI).

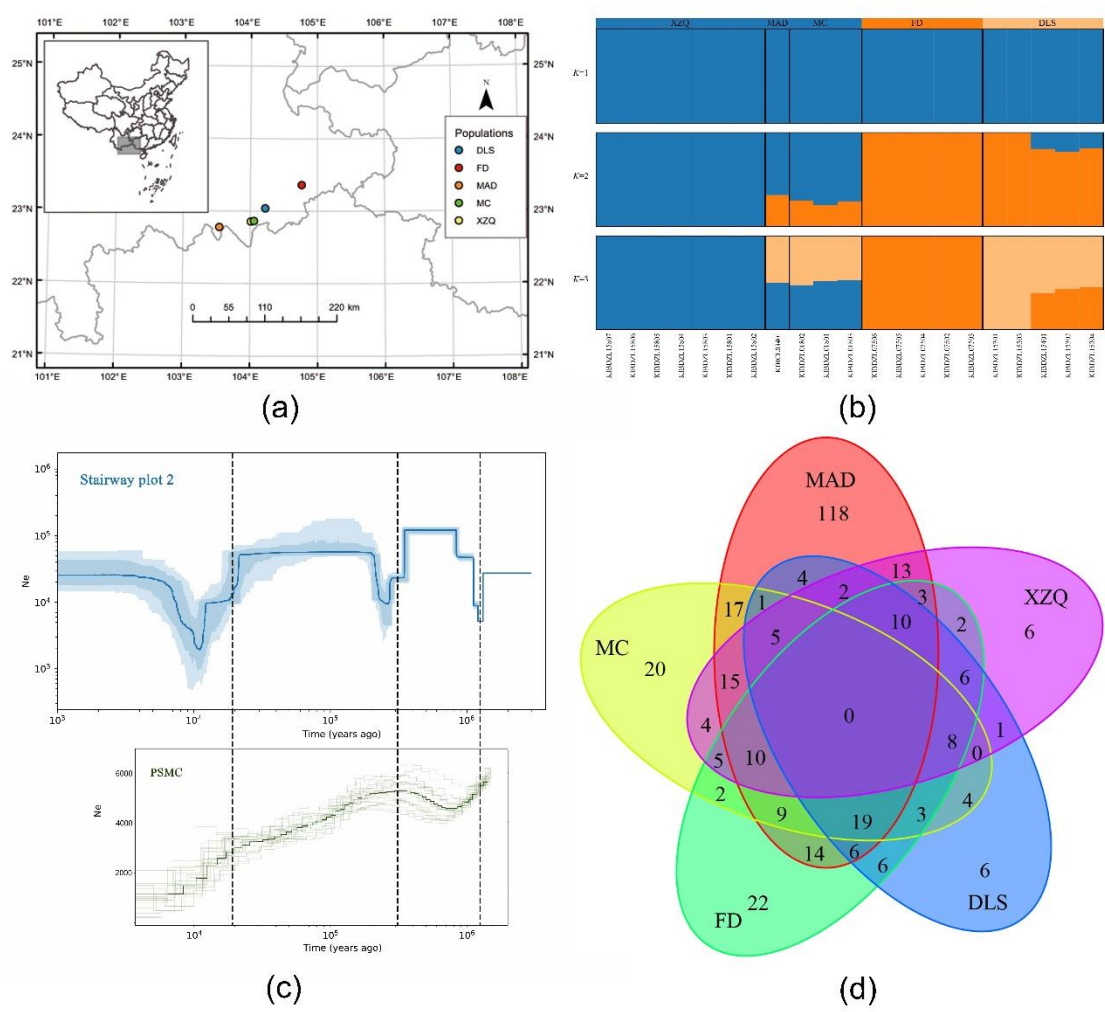

987  
 988 **FIGURE 3** (a) Distribution map showing the locations of the five subpopulations in Yunnan. (b)  
 989 Plots of the population structure of 21 *Magnolia sinica* individuals from five provenances for  
 990 different numbers of subpopulations (K), from K = 1 to K = 3. (c) The demographic history of *M.*  
 991 *sinica* inferred in Stairway plot2 (with a generation time of 30 years, and a mutation rate of 1.2e-7.  
 992 The 95% confidence interval for the estimated effective population size is shown in a light blue  
 993 color) and PSMC plot (with 21 samples of *M. sinica*, with the blue line being the average effective  
 994 population size). (d) Venn diagram showing distribution of shared and unique deleterious mutations  
 995 among the five subpopulations of *M. sinica*.

996 MAD, Maandi population in Jinping County; FD, Fadou population in Xichou County; XZQ,  
 997 Xinzhaiqing population in Maguan County; DLS, Dalishu population in Maguan County; MC,  
 998 Miechang population in Maguan County.

999 **Table 1 Statistics of *Magnolia sinica* genome assembly and annotation**

| <b>Parameter</b>                   | <b><i>Magnolia sinica</i></b> |
|------------------------------------|-------------------------------|
| Total assembly size (bp)           | 1,839,595,854                 |
| GC content (%)                     | 40.18                         |
| Total number of contigs            | 203                           |
| Maximum contig length (bp)         | 96,921,630                    |
| Minimum contig length (bp)         | 5,003                         |
| Contig N50 (bp)                    | 44,871,976                    |
| Contig N90 (bp)                    | 10,133,504                    |
| Total number of scaffolds          | 130                           |
| Maximum scaffold length (bp)       | 141,926,363                   |
| Minimum scaffold length (bp)       | 5,003                         |
| Scaffold N50 (bp)                  | 92,164,922                    |
| Scaffold N90 (bp)                  | 73,752,208                    |
| Gap number                         | 73                            |
| Complete BUSCOs (%)                | 90.5                          |
| Complete single-copy BUSCOs (%)    | 86.7                          |
| Complete and duplicated BUSCOs (%) | 3.8                           |
| Fragmented BUSCOs (%)              | 2.8                           |
| Missing BUSCOs (%)                 | 6.7                           |
| Gene number                        | 44,713                        |
| Protein-coding genes               | 43,473                        |
| LAI value                          | 10.3                          |

**Table 1 Statistics of *Magnolia sinica* genome assembly and annotation**

| <b>Parameter</b>                   | <b><i>Magnolia sinica</i></b> |
|------------------------------------|-------------------------------|
| Total assembly size (bp)           | 1,839,595,854                 |
| GC content (%)                     | 40.18                         |
| Total number of contigs            | 203                           |
| Maximum contig length (bp)         | 96,921,630                    |
| Minimum contig length (bp)         | 5,003                         |
| Contig N50 (bp)                    | 44,871,976                    |
| Contig N90 (bp)                    | 10,133,504                    |
| Total number of scaffolds          | 130                           |
| Maximum scaffold length (bp)       | 141,926,363                   |
| Minimum scaffold length (bp)       | 5,003                         |
| Scaffold N50 (bp)                  | 92,164,922                    |
| Scaffold N90 (bp)                  | 73,752,208                    |
| Gap number                         | 73                            |
| Complete BUSCOs (%)                | 90.5                          |
| Complete single-copy BUSCOs (%)    | 86.7                          |
| Complete and duplicated BUSCOs (%) | 3.8                           |
| Fragmented BUSCOs (%)              | 2.8                           |
| Missing BUSCOs (%)                 | 6.7                           |
| Gene number                        | 44,713                        |
| Protein-coding genes               | 43,473                        |
| LAI value                          | 10.3                          |

Figure 1

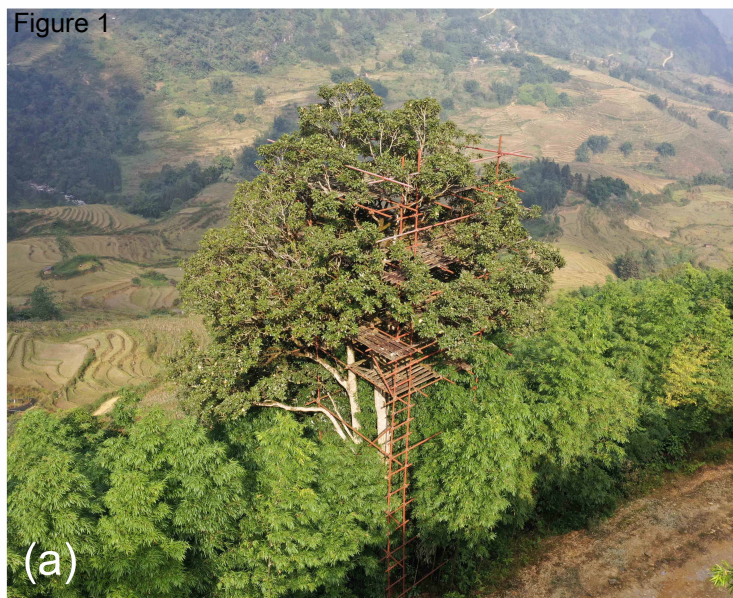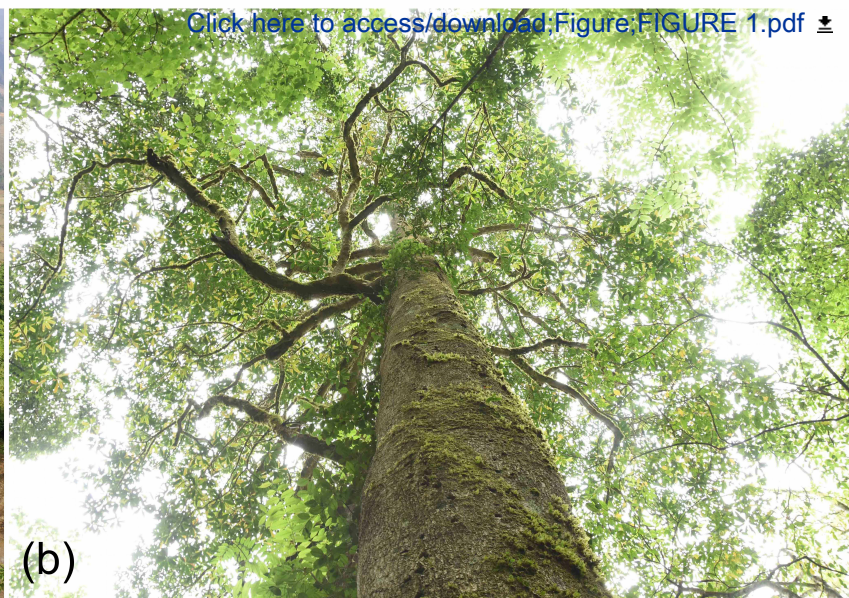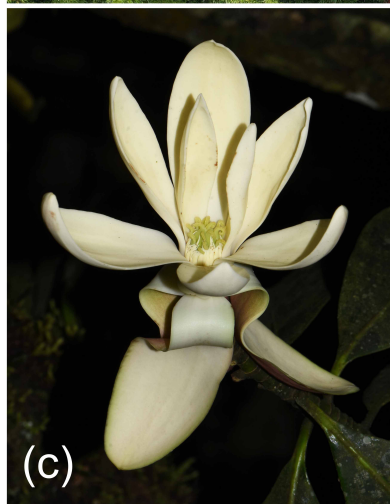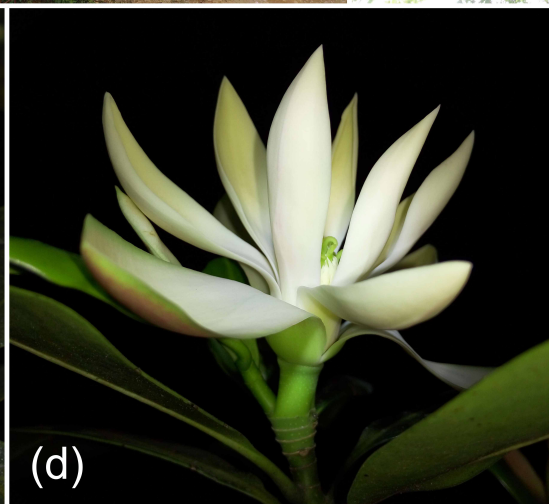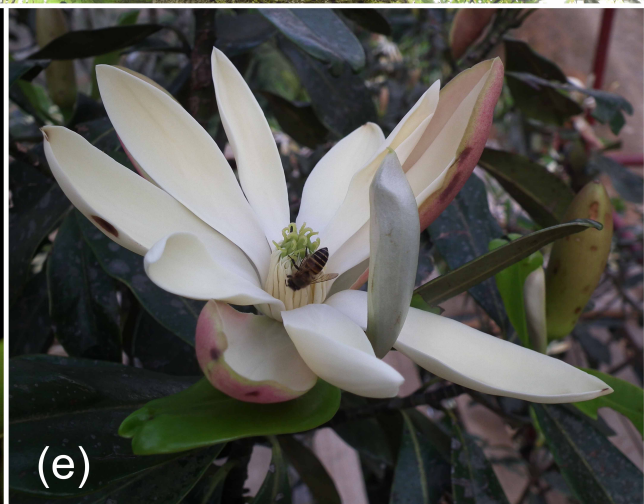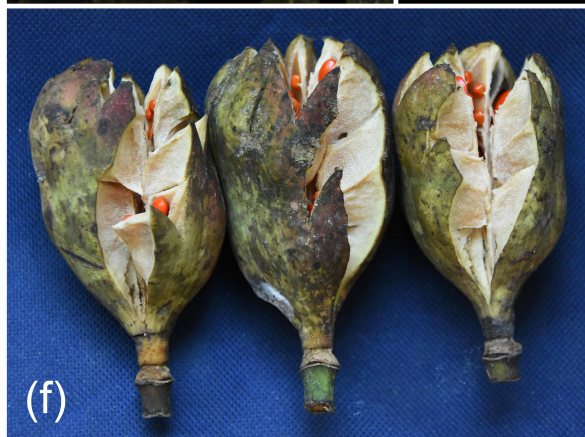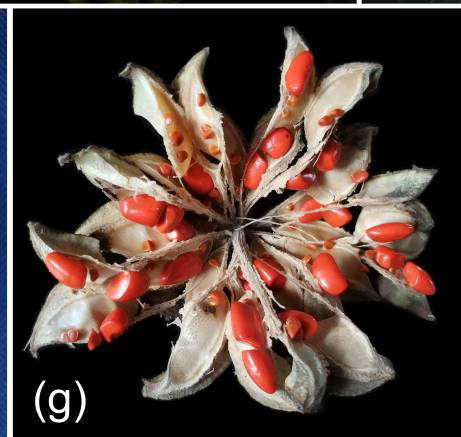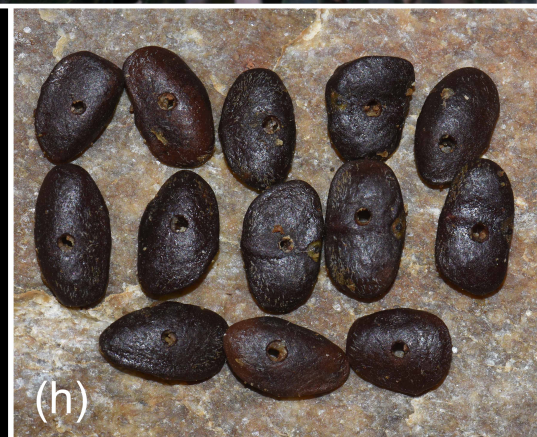

Figure 2

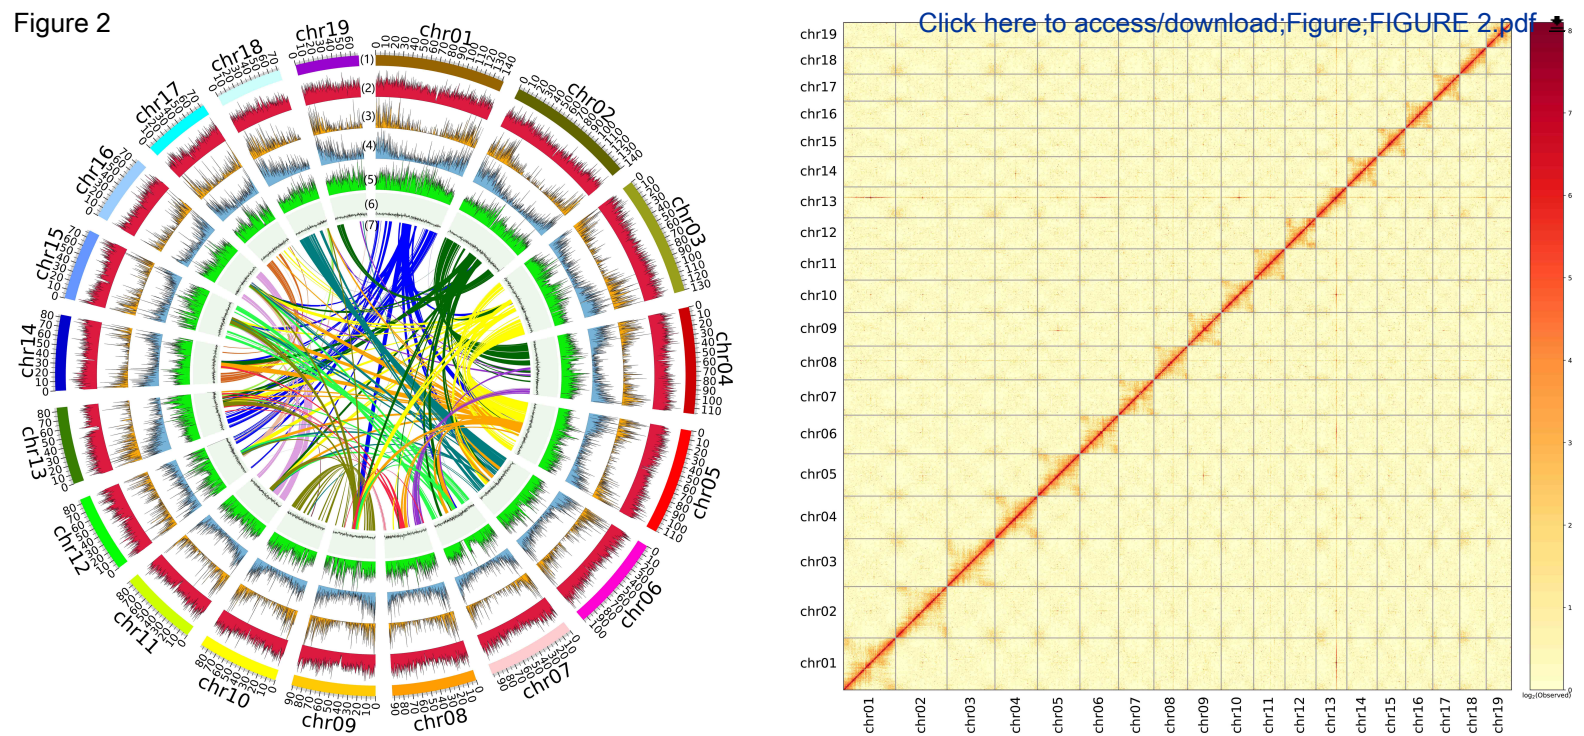

(a)

(b)

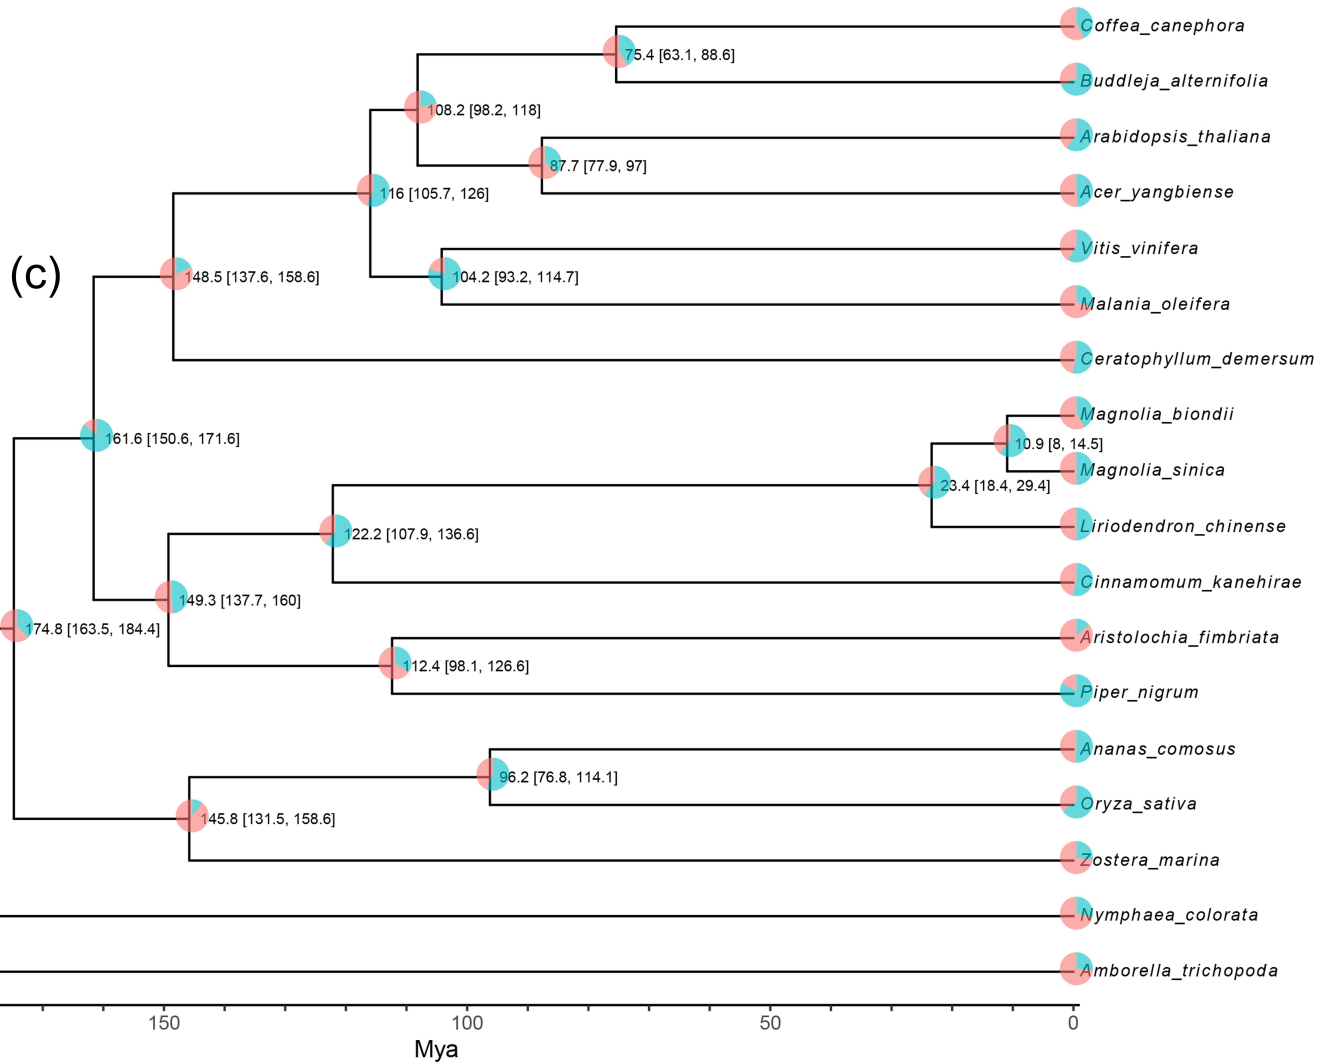

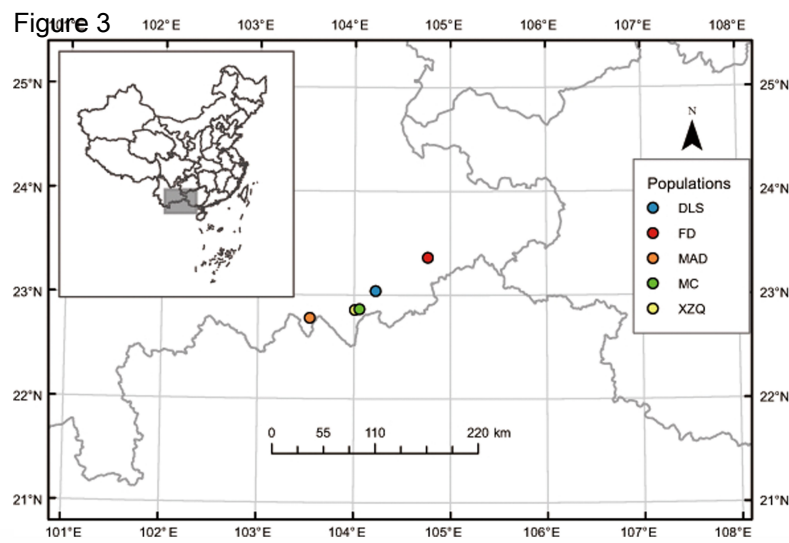

(a)

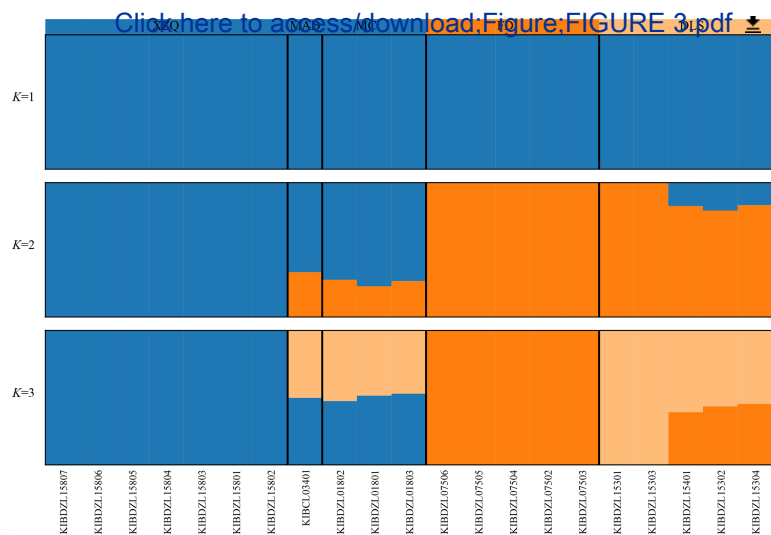

(b)

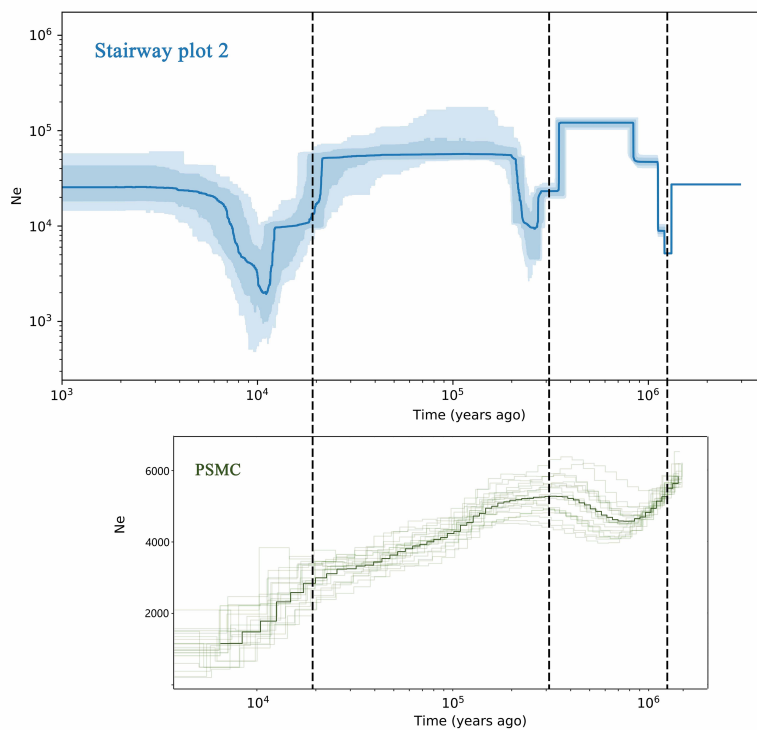

(c)

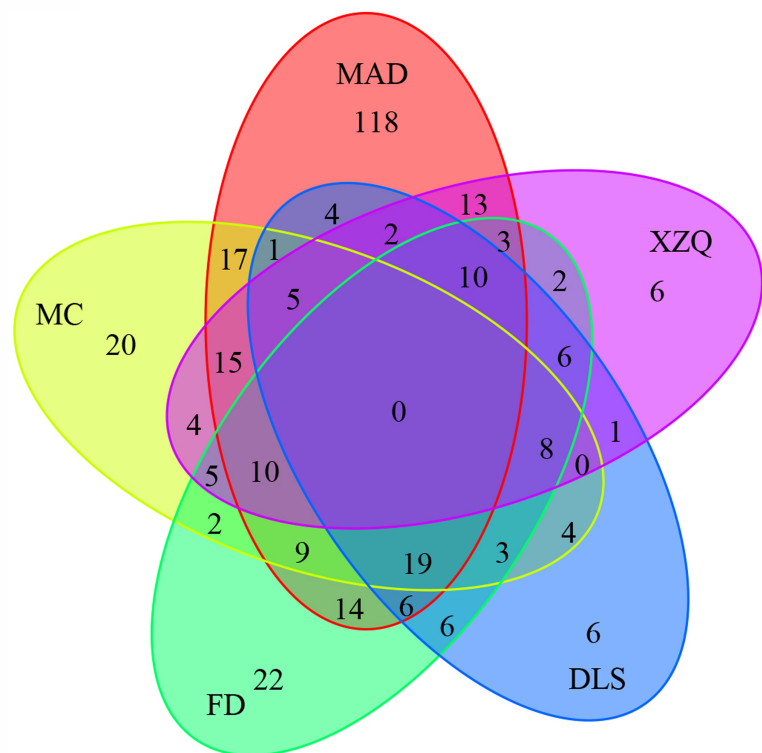

(d)

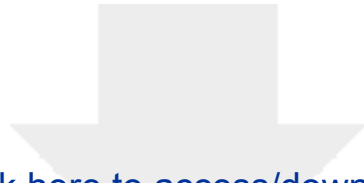

Click here to access/download  
**Supplementary Material**  
Supplementary file-Tables.xlsx

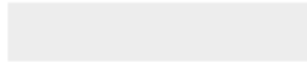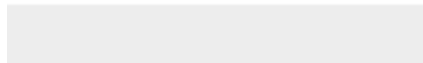



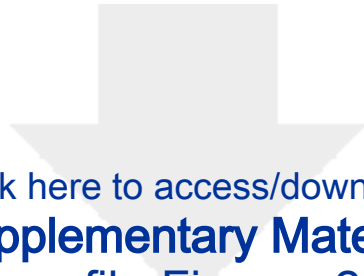

[Click here to access/download](#)

**Supplementary Material**

Supplementary file-Figures 20230306.pdf

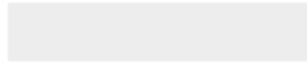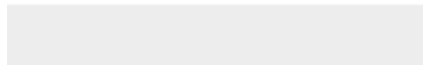

Supplement: giad110_giga-d-23-00060_original_submission.pdf [file giad110_giga-d-23-00060_original_submission.pdf]
