# Supplementary material for: The chromosome-scale genome of Magnolia sinica (Magnoliaceae) provides insights into the conservation of plant species with extremely small populations (PSESP)
Source: PubMed Central journal article supplement (PMC10999834; doi:10.1093/gigascience/giad110), 2024-01-11
Supplement: giad110_giga-d-23-00060_revision_1.pdf [file giad110_giga-d-23-00060_revision_1.pdf]

# GigaScience

## The chromosome-scale genome of *Magnolia sinica* (Magnoliaceae) provides insights into the conservation of plant species with extremely small populations (PSESP) --Manuscript Draft--

|                                                      |                                                                                                                                                                                                                                                                                                                                                                                                                                                                                                                                                                                                                                                                                                                                                                                                                                                                                                                                                                                                                                                                                                                                                                                                                                                                                                                                                                                                                                                                                                                                                                                                                                                                                                                                                                                                                         |                   |
|------------------------------------------------------|-------------------------------------------------------------------------------------------------------------------------------------------------------------------------------------------------------------------------------------------------------------------------------------------------------------------------------------------------------------------------------------------------------------------------------------------------------------------------------------------------------------------------------------------------------------------------------------------------------------------------------------------------------------------------------------------------------------------------------------------------------------------------------------------------------------------------------------------------------------------------------------------------------------------------------------------------------------------------------------------------------------------------------------------------------------------------------------------------------------------------------------------------------------------------------------------------------------------------------------------------------------------------------------------------------------------------------------------------------------------------------------------------------------------------------------------------------------------------------------------------------------------------------------------------------------------------------------------------------------------------------------------------------------------------------------------------------------------------------------------------------------------------------------------------------------------------|-------------------|
| <b>Manuscript Number:</b>                            | GIGA-D-23-00060R1                                                                                                                                                                                                                                                                                                                                                                                                                                                                                                                                                                                                                                                                                                                                                                                                                                                                                                                                                                                                                                                                                                                                                                                                                                                                                                                                                                                                                                                                                                                                                                                                                                                                                                                                                                                                       |                   |
| <b>Full Title:</b>                                   | The chromosome-scale genome of <i>Magnolia sinica</i> (Magnoliaceae) provides insights into the conservation of plant species with extremely small populations (PSESP)                                                                                                                                                                                                                                                                                                                                                                                                                                                                                                                                                                                                                                                                                                                                                                                                                                                                                                                                                                                                                                                                                                                                                                                                                                                                                                                                                                                                                                                                                                                                                                                                                                                  |                   |
| <b>Article Type:</b>                                 | Research                                                                                                                                                                                                                                                                                                                                                                                                                                                                                                                                                                                                                                                                                                                                                                                                                                                                                                                                                                                                                                                                                                                                                                                                                                                                                                                                                                                                                                                                                                                                                                                                                                                                                                                                                                                                                |                   |
| <b>Funding Information:</b>                          | National Science & Technology Basic Resources Investigation Program of China (2017FY100100)                                                                                                                                                                                                                                                                                                                                                                                                                                                                                                                                                                                                                                                                                                                                                                                                                                                                                                                                                                                                                                                                                                                                                                                                                                                                                                                                                                                                                                                                                                                                                                                                                                                                                                                             | Prof. Weibang Sun |
|                                                      | Yunnan Fundamental Research Projects (202101AT070173)                                                                                                                                                                                                                                                                                                                                                                                                                                                                                                                                                                                                                                                                                                                                                                                                                                                                                                                                                                                                                                                                                                                                                                                                                                                                                                                                                                                                                                                                                                                                                                                                                                                                                                                                                                   | Dr. Lei Cai       |
|                                                      | National Natural Science Foundation of China (NSFC) (32101407)                                                                                                                                                                                                                                                                                                                                                                                                                                                                                                                                                                                                                                                                                                                                                                                                                                                                                                                                                                                                                                                                                                                                                                                                                                                                                                                                                                                                                                                                                                                                                                                                                                                                                                                                                          | Dr. Lei Cai       |
|                                                      | National Natural Science Foundation of China (NSFC) – Yunnan Joint Fund (U1302262)                                                                                                                                                                                                                                                                                                                                                                                                                                                                                                                                                                                                                                                                                                                                                                                                                                                                                                                                                                                                                                                                                                                                                                                                                                                                                                                                                                                                                                                                                                                                                                                                                                                                                                                                      | Prof. Weibang Sun |
| <b>Abstract:</b>                                     | <p><i>Magnolia sinica</i> (Magnoliaceae) is a highly threatened tree endemic to Southeast Yunnan, China. In this study, we generated for the first time a high-quality chromosome-scale genome sequence from <i>M. sinica</i>, by combining Illumina and ONT data with Hi-C scaffolding methods. The final assembled genome size of <i>M. sinica</i> was 1.84 Gb, with a contig N50 of ca. 45 Mb and scaffold N50 of 92 Mb. Identified repeats constituted approximately 57% of the genome, and 43,473 protein-coding genes were predicted. Phylogenetic analysis show that the magnolias form a sister clade with the eudicots and the order Ceratophyllales, while the monocots are sister to the other core angiosperms. In our study, a total of 21 individuals from the five remnant populations of <i>M. sinica</i>, as well as 22 specimens belonging to eight related Magnoliaceae species, were resequenced. The results showed that <i>M. sinica</i> had higher genetic diversity (<math>\theta_w = 0.01126</math> and <math>\theta_\pi = 0.01158</math>) than other related species in the Magnoliaceae. However, population structure analysis suggested that the genetic differentiation among the five <i>M. sinica</i> populations was very low. Analyses of the demographic history of the species using different models consistently revealed that two bottleneck events occurred. The contemporary effective population size of <i>M. sinica</i> was estimated to be 10.9. The different patterns of genetic loads (inbreeding and numbers of deleterious mutations) suggested constructive strategies for the conservation of these five different populations of <i>M. sinica</i>. Overall, this high-quality genome will be a valuable genomic resource for conservation of <i>M. sinica</i>.</p> |                   |
| <b>Corresponding Author:</b>                         | Yongpeng Ma<br><br>CHINA                                                                                                                                                                                                                                                                                                                                                                                                                                                                                                                                                                                                                                                                                                                                                                                                                                                                                                                                                                                                                                                                                                                                                                                                                                                                                                                                                                                                                                                                                                                                                                                                                                                                                                                                                                                                |                   |
| <b>Corresponding Author Secondary Information:</b>   |                                                                                                                                                                                                                                                                                                                                                                                                                                                                                                                                                                                                                                                                                                                                                                                                                                                                                                                                                                                                                                                                                                                                                                                                                                                                                                                                                                                                                                                                                                                                                                                                                                                                                                                                                                                                                         |                   |
| <b>Corresponding Author's Institution:</b>           |                                                                                                                                                                                                                                                                                                                                                                                                                                                                                                                                                                                                                                                                                                                                                                                                                                                                                                                                                                                                                                                                                                                                                                                                                                                                                                                                                                                                                                                                                                                                                                                                                                                                                                                                                                                                                         |                   |
| <b>Corresponding Author's Secondary Institution:</b> |                                                                                                                                                                                                                                                                                                                                                                                                                                                                                                                                                                                                                                                                                                                                                                                                                                                                                                                                                                                                                                                                                                                                                                                                                                                                                                                                                                                                                                                                                                                                                                                                                                                                                                                                                                                                                         |                   |
| <b>First Author:</b>                                 | Lei Cai, Ph.D.                                                                                                                                                                                                                                                                                                                                                                                                                                                                                                                                                                                                                                                                                                                                                                                                                                                                                                                                                                                                                                                                                                                                                                                                                                                                                                                                                                                                                                                                                                                                                                                                                                                                                                                                                                                                          |                   |
| <b>First Author Secondary Information:</b>           |                                                                                                                                                                                                                                                                                                                                                                                                                                                                                                                                                                                                                                                                                                                                                                                                                                                                                                                                                                                                                                                                                                                                                                                                                                                                                                                                                                                                                                                                                                                                                                                                                                                                                                                                                                                                                         |                   |
| <b>Order of Authors:</b>                             | Lei Cai, Ph.D.                                                                                                                                                                                                                                                                                                                                                                                                                                                                                                                                                                                                                                                                                                                                                                                                                                                                                                                                                                                                                                                                                                                                                                                                                                                                                                                                                                                                                                                                                                                                                                                                                                                                                                                                                                                                          |                   |
|                                                      | Detuan Liu                                                                                                                                                                                                                                                                                                                                                                                                                                                                                                                                                                                                                                                                                                                                                                                                                                                                                                                                                                                                                                                                                                                                                                                                                                                                                                                                                                                                                                                                                                                                                                                                                                                                                                                                                                                                              |                   |
|                                                      | Fengmao Yang                                                                                                                                                                                                                                                                                                                                                                                                                                                                                                                                                                                                                                                                                                                                                                                                                                                                                                                                                                                                                                                                                                                                                                                                                                                                                                                                                                                                                                                                                                                                                                                                                                                                                                                                                                                                            |                   |
|                                                      | Rengang Zhang                                                                                                                                                                                                                                                                                                                                                                                                                                                                                                                                                                                                                                                                                                                                                                                                                                                                                                                                                                                                                                                                                                                                                                                                                                                                                                                                                                                                                                                                                                                                                                                                                                                                                                                                                                                                           |                   |

|                                                |                                                                                                                                                                                                                                                                                                                                                                                                                                                                                                                                                                                                                                                                                                                                                                                                                                                                                                                                                                                                                                                                                                                                                                                                                                                                                                                                                                                                                                                                                                                                                                                                                                                                                                                                                                                                                                                                                                                                                                                                                                                                                                                                                                                                                                                                                                                                                                                                                                                                                                                                                                                                                                                                                                                                                                                                                                                                                                                                                                                                                                                                                                                                                                                                                                                                                                                                                                                                                                                                                                                                                                                                                                                                                                                                                                                                                                                                                                                                                                                                                                                                                                                                                                                                                                                                                            |
|------------------------------------------------|--------------------------------------------------------------------------------------------------------------------------------------------------------------------------------------------------------------------------------------------------------------------------------------------------------------------------------------------------------------------------------------------------------------------------------------------------------------------------------------------------------------------------------------------------------------------------------------------------------------------------------------------------------------------------------------------------------------------------------------------------------------------------------------------------------------------------------------------------------------------------------------------------------------------------------------------------------------------------------------------------------------------------------------------------------------------------------------------------------------------------------------------------------------------------------------------------------------------------------------------------------------------------------------------------------------------------------------------------------------------------------------------------------------------------------------------------------------------------------------------------------------------------------------------------------------------------------------------------------------------------------------------------------------------------------------------------------------------------------------------------------------------------------------------------------------------------------------------------------------------------------------------------------------------------------------------------------------------------------------------------------------------------------------------------------------------------------------------------------------------------------------------------------------------------------------------------------------------------------------------------------------------------------------------------------------------------------------------------------------------------------------------------------------------------------------------------------------------------------------------------------------------------------------------------------------------------------------------------------------------------------------------------------------------------------------------------------------------------------------------------------------------------------------------------------------------------------------------------------------------------------------------------------------------------------------------------------------------------------------------------------------------------------------------------------------------------------------------------------------------------------------------------------------------------------------------------------------------------------------------------------------------------------------------------------------------------------------------------------------------------------------------------------------------------------------------------------------------------------------------------------------------------------------------------------------------------------------------------------------------------------------------------------------------------------------------------------------------------------------------------------------------------------------------------------------------------------------------------------------------------------------------------------------------------------------------------------------------------------------------------------------------------------------------------------------------------------------------------------------------------------------------------------------------------------------------------------------------------------------------------------------------------------------------|
|                                                | Quanzheng Yun                                                                                                                                                                                                                                                                                                                                                                                                                                                                                                                                                                                                                                                                                                                                                                                                                                                                                                                                                                                                                                                                                                                                                                                                                                                                                                                                                                                                                                                                                                                                                                                                                                                                                                                                                                                                                                                                                                                                                                                                                                                                                                                                                                                                                                                                                                                                                                                                                                                                                                                                                                                                                                                                                                                                                                                                                                                                                                                                                                                                                                                                                                                                                                                                                                                                                                                                                                                                                                                                                                                                                                                                                                                                                                                                                                                                                                                                                                                                                                                                                                                                                                                                                                                                                                                                              |
|                                                | Zhiling Dao, PhD                                                                                                                                                                                                                                                                                                                                                                                                                                                                                                                                                                                                                                                                                                                                                                                                                                                                                                                                                                                                                                                                                                                                                                                                                                                                                                                                                                                                                                                                                                                                                                                                                                                                                                                                                                                                                                                                                                                                                                                                                                                                                                                                                                                                                                                                                                                                                                                                                                                                                                                                                                                                                                                                                                                                                                                                                                                                                                                                                                                                                                                                                                                                                                                                                                                                                                                                                                                                                                                                                                                                                                                                                                                                                                                                                                                                                                                                                                                                                                                                                                                                                                                                                                                                                                                                           |
|                                                | Yongpeng Ma                                                                                                                                                                                                                                                                                                                                                                                                                                                                                                                                                                                                                                                                                                                                                                                                                                                                                                                                                                                                                                                                                                                                                                                                                                                                                                                                                                                                                                                                                                                                                                                                                                                                                                                                                                                                                                                                                                                                                                                                                                                                                                                                                                                                                                                                                                                                                                                                                                                                                                                                                                                                                                                                                                                                                                                                                                                                                                                                                                                                                                                                                                                                                                                                                                                                                                                                                                                                                                                                                                                                                                                                                                                                                                                                                                                                                                                                                                                                                                                                                                                                                                                                                                                                                                                                                |
|                                                | Weibang Sun, PhD                                                                                                                                                                                                                                                                                                                                                                                                                                                                                                                                                                                                                                                                                                                                                                                                                                                                                                                                                                                                                                                                                                                                                                                                                                                                                                                                                                                                                                                                                                                                                                                                                                                                                                                                                                                                                                                                                                                                                                                                                                                                                                                                                                                                                                                                                                                                                                                                                                                                                                                                                                                                                                                                                                                                                                                                                                                                                                                                                                                                                                                                                                                                                                                                                                                                                                                                                                                                                                                                                                                                                                                                                                                                                                                                                                                                                                                                                                                                                                                                                                                                                                                                                                                                                                                                           |
| <b>Order of Authors Secondary Information:</b> |                                                                                                                                                                                                                                                                                                                                                                                                                                                                                                                                                                                                                                                                                                                                                                                                                                                                                                                                                                                                                                                                                                                                                                                                                                                                                                                                                                                                                                                                                                                                                                                                                                                                                                                                                                                                                                                                                                                                                                                                                                                                                                                                                                                                                                                                                                                                                                                                                                                                                                                                                                                                                                                                                                                                                                                                                                                                                                                                                                                                                                                                                                                                                                                                                                                                                                                                                                                                                                                                                                                                                                                                                                                                                                                                                                                                                                                                                                                                                                                                                                                                                                                                                                                                                                                                                            |
| <b>Response to Reviewers:</b>                  | <p>Comments to the editor and reviewers<br/> Dear the Editor of GigaScience,<br/> Thank you very much for editing this manuscript entitled “The chromosome-scale genome of <i>Magnolia sinica</i> (Magnoliaceae) provides insights into the conservation of plant species with extremely small populations (PSESP)” and making suggestions. We are also very grateful for the efforts of the two reviewers. We have revised the manuscript carefully according to their comments and have made responses listed below.</p> <p>We have accepted most of the comments from the two reviewers, made revisions to the errors that occurred, added some relevant analyses, and have responded to and explained a small portion of the questions. 1) We have added discussions of the coexistence of high genetic diversity and low genetic differentiation to the manuscript in the DISCUSSION part. 2) We have added relevant supplementary figures with bootstrap values in the phylogenetic tree (Figure S5). 3) We have added parameters and we have added KAT analysis. 4) We have released all the data produced to date (<a href="https://www.ncbi.nlm.nih.gov/bioproject/PRJNA774088">https://www.ncbi.nlm.nih.gov/bioproject/PRJNA774088</a>). 5) We have explained why the whole genome sequencing and transcriptome sequencing (RNA-seq) analyses did not use material from the same individual, and also explained why only 21 individuals were re sequenced. Please review the specific revisions and responses.</p> <p>We resubmit the revised manuscript and we hope this version is now suitable for the publication in GigaScience. If you have any further questions or requirements, please do not hesitate to contact the corresponding author (MYP).</p> <p>Yours sincerely,<br/> Yongpeng Ma (corresponding authors on behalf of all authors).<br/> 26th JULY 2023</p> <p>Reviewer #1: In this paper, authors reported the first genome of a critically endangered species <i>Magnolia sinica</i>. This large tree is widely known as "giant pandas in plants" due to its extremely rare individuals in wild, thus is under the first-class state protection in China. Here, authors obtained a high-quality chromosome-level genome assembly via combining Illumina, PacBio and Hi-C sequencing data.</p> <p>Authors mainly focus on the population resequencing, showing a high genetic diversity of <i>M. sinica</i> population but a low genetic differentiation among subpopulations. Authors provide some explanations for each result. I wonder if author can discuss the potential connections between these two observed phenomena. In addition, authors detected many deleterious mutations which were mostly related to lipids. Authors didn't mention this result in the DISCUSSION part. Are these deleterious mutations related to lipids results of or reasons for the endangered status of this species? Authors may provide further discussions or even conclusive evidences to clearly elucidate point of view this issue.</p> <p>Response: Thank you for your suggestion. We now added discussions of coexistence of high genetic diversity and low genetic differentiation to the manuscript in the DISCUSSION part as below:<br/> “<i>M. sinica</i> has a pollinator-dependent outcrossing mating system, which may contribute to its high genetic diversity; while high gene flow among populations may maintain links between populations of this species, and may contribute to its low genetic differentiation. The recent reduction in population size due to anthropogenic activities has led to isolation of the populations, leading to the high genetic diversity and low genetic differentiation now observed in the fragmented populations of this endangered tree species. Similar patterns have been reported in <i>Michelia coriacea</i>, another species in the Magnoliaceae [131].”</p> <p>Regarding the deleterious mutations related to lipids, we could not conclude whether they were the results of or the reasons for the endangered status of <i>Magnolia sinica</i>, and we have therefore deleted the parts of the GO and KEGG annotations and enrichment analysis regarding deleterious mutations from the manuscript.</p> |

#### Reference

Zhao X, Ma Y, Sun W, et al. (2012) High genetic diversity and low differentiation of *Michelia coriacea* (Magnoliaceae), a critically endangered endemic in southeast Yunnan, China. *International Journal of Molecular Sciences*, 13(4): 4396–4411.

Minor concerns:

1. Introduction part: authors should point out what's the major limitations of the current protection of Huagaimu. And how a reference genome helps to overcome such limitations.

Response: Thank you. We have added the first part in the manuscript. And, the second part was included in last paragraph of the introduction as below.

“Although a great deal of protection and research action has been carried out, the lack of natural regeneration and genetic rescue still limits the protection of *M. sinica*.

Therefore, the formulation of genetic rescue strategies for *M. sinica* will benefit greatly from the exploration of harmful cumulative mutations, population historical dynamics and effective population size from the whole genome level.

Here, we report a high-quality chromosome-scale genome sequence of *Magnolia sinica*, and compare it with other relevant published genomic data. By exploring the evolution of the genome, as well as the genetic characteristics, demographic history and genetic load of *M. sinica*, we have identified genomic factors that may contribute to the threats to this species, and, on the basis of this, we propose further strategies for the conservation of *M. sinica*.”

2. *Magnolia sinica* was first occurred in Line 79 in the main text and it should be written as *M. sinica* afterwards.

Response: Thank you. We have checked and revised this.

3. Line 206: "integrated annotated protein" should be "integrated annotated proteins".

Response: Thank you. We have revised this.

4. Line 222-224: References were needed here.

Response: Thank you. We have added relevant references.

5. Line 253: "θW" should be "θw".

Response: Thank you. We have revised this.

6. Fig. 2c, there shouldn't be a "\_" within species name. And, bootstrap values should be indicated in the phylogenetic tree. In addition, Fig. 2 contained different results with no obvious connections. I do recommend to layout the content of this figure, focusing on one particular theme.

Response: Thank you. We now deleted the "\_" within species name. We have added a relevant supplementary figure with the bootstrap values in the phylogenetic tree, please check (Figure S5). Because of the large number of figures in the manuscript, we have tried to save space and have given the figures (genomic character and genome evolution), where related figures are merged into one plate and explanations are provided separately.

7. No title was found in Fig. 3. Authors should give a strong title that reflects the major finding of this figure.

Response: Thank you. We have added a title (Distribution map, population structure, demographic history and Venn diagram of *Magnolia sinica*) for this Figure 3.

Reviewer #2: This manuscript described the assembly and analyses of the chromosome-scale genome assembly for *Magnolia sinica*, an endangered Magnoliaceae species. Despite the authors provided a useful piece of work, it can still be greatly improved. In particular, it needs a thorough proofing to clarify many points in the Material & Methods section, as well as in results.

However, a major interrogation is the rational of resequencing only 21 *M. sinica* and 22 other *Magnolia*, while there is only 52 remaining *M. sinica* in the wild. I think it would have shown a much complete picture to generate data for all (known) individuals in the species.

Response: Thank you for your questions. In 2019, we only re-sequenced the materials that we had collected (21 samples). These materials included samples from all populations and covered the full range of the *Magnolia sinica* distribution, representing >40% of all *M. sinica* individuals. Because the collection of these materials took a lot of money and time, considering the cost of re-collection and the expensive re-sequencing costs at the time, we were unable to collect material from more individuals.

Furthermore, based on the preliminary analysis of our sequencing data, we found that there were no significant differences (such as genetic diversity or genetic structure) compared to previous population studies based on SSR (Chen 2017, in Chinese).

Therefore, we only sequenced 21 individuals of *M. sinica* from that time. The phylogenetic position of *M. sinica* has always been controversial, so we chose to sequence 22 samples from other eight *Magnolia* species. We have provided the relevant chloroplast tree (attached figure 1 chloroplast tree) and SNPs tree (attached figure 2 SNP\_tree) as attachments at the bottom of this file.

I noticed several mistakes in the description of used data and methods. For example: (1) line 21 the authors mentioned using Pacbio data for genome assembly, but from the Material & Methods, they used only ONT data to generate long reads for assembly

Response: We have revised this mistake.

(2) they mentioned a QiaGen kit that seems to not exist in Material & Methods line 149 they mentioned using Pilon to modify - correct? - Illumina reads; should be the opposite

Response: The reagent kit with product number 13323, Qiagen, is available. Genomic DNA kit (cat. no. 13323. Qiagen, Hilden, Germany). Please check:

<https://www.qiagen.com/us/products/discovery-and-translational-research/dna-rna-purification/dna-purification/genomic-dna/blood-and-cell-culture-dna-kits>.

We have corrected the description of correcting with Illumina reads.

(3) Parameters used for pipelines are missing in several part of the manuscript Also, the usually used metrics and quality assessment methods were not used here; I would appreciate to get a Merqury / KAT/ GenomeScope analysis in addition to the BUSCO and LAI.

Response: We have added parameters and a KAT analysis.

Also, I don't really understand why the authors performed RNAseq for annotation from a different individual, instead of using the same individual as for the genome assembly.

Response: Thank you. We understand your concern regarding this issue, unfortunately we faced some challenges during this project. In 2019, when we started sequencing, leaf samples were initially sent to a company in dry ice for genome sequencing. Later in 2020, when we collected multiple tissues for RNA-seq, it became very difficult to send samples rapidly in dry ice because of special policies (special periods of COVID-19). Therefore, for simplicity, we decided to directly send a living seedling (including leaf, stem, root tissues, but excluding other tissues such as flowers) and fresh fruits at room temperature (without dry ice) for RNA-seq. Therefore, the RNAseq and genome assembly analyses were conducted using different individuals. However, because we used the PacBio platform to sequence the full-length cDNA, the variations between individuals should have very limited negative effects on gene annotation. In fact, 99.5% PacBio CCS reads were mapped to the genome.

The ancestral sequence reconstruction part appeared quite weak with the method used, not taking into account the emergence of potentially large Structural Variations (SVs) across the chromosomes during their evolutions. I would suggest, if the authors want to keep this part to use a more robust approach (e.g. based on Salse, 2021 approach)

Response: Thank you for your suggestion. We agree that the emergence of SV may influence the reconstruction of ancestral state. However, SV is difficult to detect from our short resequencing reads. Here we used an empirical Bayesian method based on posterior probability of the sites to reconstruct ancestral sequence. This method can produce accurate reconstruction of the ancestral sequence (Hanson-Smith et al. 2010) and has been previously used to reconstruct the ancestral state in other works (Cristofari et al., 2016; Salojärvi et al., 2017; Ma et al., 2021; Fukushima et al., 2023). We apologize for not being able to find the article by "Salse, 2021". After explaining our method above, if it is necessary to use Salse's approach, could you please provide us more information about it and give us another chance to revise it?

#### References

Cristofari R, Bertorelle G, Ancel A, et al. Full circumpolar migration ensures evolutionary unity in the Emperor penguin. *Nat Commun.* 2016;7:11842. doi: org/10.1038/ncomms11842.

Fukushima K, Pollock DD. Detecting macroevolutionary genotype–phenotype associations using error-corrected rates of protein convergence. *Nat Ecol Evol.* 2023;7: 155–170. doi: org/10.1038/s41559-022-01932-7.

Hanson-Smith V, Kolaczkowski B, Thornton JW. Robustness of Ancestral Sequence Reconstruction to Phylogenetic Uncertainty. *Mol Biol Evol.* 2010;27 (9):1988–1999. Doi: org/10.1093/molbev/msq081.

Ma H, Liu YB, Liu DT, et al. Chromosome-level genome assembly and population genetic analysis of a critically endangered rhododendron provide insights into its conservation. *Plant J.* 2021;107(5):1533–45. doi: 10.1111/tpj.15399.

Salojärvi J, Smolander OP, Nieminen K. et al. Genome sequencing and population genomic analyses provide insights into the adaptive landscape of silver birch. *Nat Genet.* 2017;49:904–912. doi: org/10.1038/ng.3862.

The data accessibility is also questionable, as the authors mentioned the BioProject PRJNA774088, that is already cited by a published paper, but not accessible  
Response: We apologize that the data were not released earlier. The data have now been completely released (<https://www.ncbi.nlm.nih.gov/bioproject/PRJNA774088>). A copy of the data can be found in China National Center for Bioinformatics (<https://ngdc.cncb.ac.cn/bioproject/browse/PRJCA015437>).

Specific comments:

-Line 21 : Only ONT data were combined with short reads to assemble the genome ;

Response: Sorry, we have revised this mistake.

-Line 59 : please add the date when the database have been accessed ;

Response: Thank you. We have corrected this and added the access dates.

-Line 93-97 : this seems more adequate for a Data Notes than for a research article ;

Response: Thank you, this is indeed only a partial summary. Here, we not only reported the high-quality chromosome-scale genome sequence of *Magnolia sinica* and re-sequenced 21 samples of the same species and 22 samples from other species, but also investigated genome evolution, genome-wide diversity, and population structure of this species, inferred its demographic history, and estimated its genetic load and inbreeding level. We further discussed the possible reason for its high genetic diversity but low genetic differentiation, the climatic, tectonic and anthropogenic explanation of its demographic history, the likely genetic basis of the extremely small populations, and provided conservation measures based on our findings. We think it is worthy of a research article.

-Line 107 : dry ice temperature is -78.5°C

Response: We have revised this mistake.

-Line 118 : this kit does not exist (the reference number is for an other kit)

Response: We have revised this. The Genomic DNA kit (cat. no. 13323. Qiagen, Hilden, Germany) is available, and this kit can also extract genomic DNA from diverse materials. The kit was also used to extract plant DNA after treatment of CTAB.

-Line 121 : more details are needed for the library construction method. What was the DNA input ? any modification from the ONT protocol ? barcoded library or not ?

Response: The DNA input was total genomic DNA. The ONT protocol was not modified, and the library was not barcoded.

-Line 124 : please choose the machine the library was run on (or precise which library was run on which machine) ; how many flowcells ?

Response: PromethION was used yielding 7 flowcells. This has been added to the manuscript.

-Line 126 : what fragment size for the Illumina library

Response: We have added insertion size of 300–500 bp.

-Line 130 : what was considered as "high molecular weight DNA" ?

Response: This refers to longer and more complete DNA with high "molecular weight".

-Line 147: please precise what assembly strategies did you used (= assemblers ?)

Response: Thank you, we have added a descriptions of the assembly method.

-Line 148 : this reference is for the Celera assembler only, did you use it ?

Response: No. We have revised the text.

-Line 149 : short reads were used to correct long reads, not the opposite ;

Response: Thank you, this has been revised.

-Line 151 : how they were polished ?

Response: The method has been added.

-Line 151 : please described the parameters used in GetOrganelles to assemble both the mitochondrial genome and plastome

Response: The parameters have been added.

-Line 159 : "scaffolded" instead of "scattered" ?

Response: This has been revised as "un-anchored" meaning contigs that were not anchored onto chromosomes.

-Line 161 : what parameters for LR\_Gapcloser and NextPolish ?

Response: The parameters have been added.

-Line 163 : Redundant (typo)

Response: It has been revised.

-Line 165 : what is the NT library ?

Response: The NT library is NT database from NCBI for BLAST (<https://ftp.ncbi.nlm.nih.gov/blast/db/>). We have revised this in the text for clarification.

-Line 167 : how low was a coverage considered ?

Response: We have revised this in the text.

-Line 172-183 : see above for addition of QC pipelines results

Response: We have added KAT analysis.

-Line 189 : how these two libraries were combined ?

Response: We concatenated the two libraries (fasta files) directly using the Linux command `cat`.

-Line 194 : Considering Magnoliaceae position in angiosperms, I think it could be useful to add at least one monocots in the annotation process (e.g. the wheat or maize, or rice genome)

Response: Thank you for your suggestion. We tested this by adding the wheat genome, and found only 551 new genes (1.3% more than before) predicted by the MAKER2 pipeline. We also tested it with the *Aristolochia fimbriata* (Piperales) genome as evidence, and 1419 genes (3.3% more) were newly identified. It appears that more protein evidences would certainly produce more genes, but considering the improvements (1.3-3.3% more genes) are quite limited and would not significantly affect our downstream conclusions regarding comparative and conservation genomics, we chose to not include the update in the revision.

-Line 201 : Augustus is usually used as an ab initio annotator ; please specify more in details how you used it the integrate previous annotations

Response: Yes, Augustus is an ab initio annotator, but it supports biological evidence (hint file from transcript and protein alignments) as input for better prediction. This step is integrated in the MAKER2 pipeline. We have revised the text for a clearer description.

-Line 217, 220, 222 : why there is a discrepancy between the single-copy gene numbers ?

Response: We used different cutoffs to allow for missing data. For the ASTRAL method, more genes are better with high ILS (incomplete lineage sorting) level, and missing data are more tolerated (References below), so we used more genes with higher missing rate (30%). For the IQTREE method, missing data are moderately tolerated, so we used the dataset with moderate missing rate (12.5%; the dataset was generated in OrthoFinder2 to infer a species tree in its pipeline). MCMCtree uses only non-missing data by default, so we just included 1:1 orthologous single-copy genes (with none missing). Different dataset may provide cross-validations to reduce sampling bias. We have added detailed descriptions.

References:

Molloy E K, Warnow T. To Include or Not to Include: The Impact of Gene Filtering on Species Tree Estimation Methods [J]. *Syst. Biol.*, 2017, 67 (2): 285–303 [<http://doi.org/10.1093/sysbio/syx077>]

Shekhar S, Roch S, Mirarab S. Species Tree Estimation Using ASTRAL: How Many Genes Are Enough? [J]. *IEEE/ACM Transactions on Computational Biology and Bioinformatics*, 2018, 15 (5): 1738–1747 [<http://doi.org/10.1109/TCBB.2017.2757930>]

-Line 235 : Why not using the 52 *M. sinica* individuals (see above) ?

Response: Thank you for your questions. In 2019, we only re-sequenced the materials that we had collected (21 samples). These materials included samples from all populations, and covered the full range of the *Magnolia sinica* distribution, representing >40% of all *M. sinica* individuals. Because the collection of these materials took a lot of money and time, considering the cost of re-collection and the expensive re-sequencing costs at the time, we were unable to collect material from more individuals. Furthermore, based on the preliminary analysis of our sequencing data, we found that there were no significant differences (such as genetic diversity or genetic structure) compared to previous population studies based on SSR (Chen 2017, in Chinese). Therefore, we only sequenced 21 individuals of *M. sinica* from that time.

-Line 241 : sequences with quality score <20 should not be found in the clean reads (from line 238)

Response: After filtering with fastp, the proportion of sequences with a quality score <20 decreases, however, there are still some bases with a quality score <20. Fastp trims reads using a sliding window, but did not trim all bases with a quality score <20. Thus, we excluded the potentially retained bases with quality score <20 in downstream

analysis (ANGSD and freebayes).

-Line 242 : considering a sequencing depth ranging from 8.8X to 12.6X for *M. sinica* (max 14.3X for other *Magnolia*), it seems unrealistic to remove sites with a mapping depth  $\leq 100X$

Response: The depth of sites refers to the sum of all samples, but not average depth across samples. The distribution of the depth of sites is as follows. The peak value is at 331x, so empirically the upper limit is set to 600x, about twice that of the peak, and the lower limit is about 1/3 of the peak. We have revised the text to make this clear.

-Line 243 : please specify how these sites were retained

Response: We have described this in more detail in the paper.

-Line 248 : why the authors did not use the widely used 10% missing data threshold?

Response: Thank you for your question. We wanted to balance the threshold and the number of SNPs. Considering that there are many species, a stricter threshold would lead to fewer SNPs, which may not have been sufficient for downstream analyses. In fact, the threshold of 20% or higher has also been used in previous studies (References below).

References:

Liu S, Zhang L, Sang Y et. al. Demographic History and Natural Selection Shape Patterns of Deleterious Mutation Load and Barriers to Introgression across *Populus* Genome [J]. *Mol. Biol. Evol.*, 2022, 39 (2) [<http://doi.org/10.1093/molbev/msac008>]

Dai F, Zhuo X, Luo G et. al. Genomic Resequencing Unravels the Genetic Basis of Domestication, Expansion, and Trait Improvement in *Morus Atropurpurea* [J]. *Adv. Sci.*, 2023 [<http://doi.org/10.1002/advs.202300039>]

Wang P, Zhou G, Jian J et. al. Whole-genome assembly and resequencing reveal genomic imprint and key genes of rapid domestication in narrow-leafed lupin [J]. *Plant J.*, 2021, 105 (5): 1192–1210 [<http://doi.org/10.1111/tbj.15100>]

Ma Z, Zhang Y, Wu L et. al. High-quality genome assembly and resequencing of modern cotton cultivars provide resources for crop improvement [J]. *Nat. Genet.*, 2021 [<http://doi.org/10.1038/s41588-021-00910-2>]

-Line 249 : due to both the relatively low number of individuals and the large part of the sampling made of other *Magnolia* species, such a classic MAF value would result in removing SNPs present in 1 or 2 samples, making them potentially diagnostic of a given species

Response: We did not aim to make diagnostic of a given species, so the species-specific SNPs were not necessary for our analyses. In the phylogenetic tree based on the filtered SNPs (attached figure 2 SNP\_tree), each species has formed a separate monophyletic clade, suggesting that our filtering with the classic MAF value did not obscure the relationships among these species.

-Line 250 and following : Please describe more in details, but concisely, how these different datasets are made, and how they are each useful (at least more useful than only one or two datasets)

Response: We apologized for the imprecise and incorrect descriptions. We have revised this and have also added an additional schematic diagram to the supplementary figures to illustrate it.

-Line 309 : please add the parameters used

Response: Thank you, we have added these.

-Line 319 : did the authors consider flow cytometry to get a (more) accurate estimate of the genome size ? Considering the patrimonial value of the species, it could be valuable.

Response: Thank you. At that time, the Genome size of *Magnolia sinica* was estimated by k-mer analysis of the Illumina sequencing data. This method is widely used and is sufficiently accurate, so we felt that we did not need to use an experimental method based on Flow Cytometry.

-Line 327 : Did the authors compare the LAI value obtained here with other *Magnolia* genome assemblies ?

Response: Thank you. We could not compare the relevant LAI values of several *Magnolia* species because the other three genomic articles did not calculate this value.

-Line 335-336 : Please add values for gene annotations from transcriptomic, ab initio and similarity approaches separately, then indicate how many were supported, filtered and so on, with the final value.

Response: The MAKER annotation pipeline used in the study does not generate individual gene annotations; instead, it only produced intermediate alignments of

evidence. Here we compared these intermediate alignments to the final gene set. Please refer to the attached table for details.

-Line 343 : what is "certain other databases of *M. sinica*" ?

Response: Thank you, we have revised this and added the annotated percentages from several different databases, and these can be found in Supplementary Table 19. "certain other databases, including Pfam (25,850, 59.46%), Coils (2,533, 5.83%), CDD (28,110, 64.70%), SMART (8,247, 18.97%) and others were annotated with InterProScan. (Table S19)".

-Line 343 : InterProScan (typo)

Response: It has been revised.

-Line 344 : 90 % BUSCO value seems very low for a modern assembly. What could explain such a low value ?

Response: Thank you. This was because previously we used an old version of BUSCO (v2). In the revision, we have used the last version BUSCO5 and the value improved significantly (97.9%). We have revised this text.

-Line 357-361 : How is it different from (or similar with) the other studies ?

Response: We have discussed the relationship between our research results and those from other studies in the discussion section.

-Line 381 : what could explain the very low mapping rate (~90%) of *M. sinica* against itself (same species) ?

Response: They are the same species according to the SNP tree and the chloroplast tree, so the low mapping rate of this individuals could be attributed to sequencing artifacts.

-Line 391 : the end of the sentence does not make sense.

Response: Thank you, we have deleted this.

-Line 440- 445 : Are these values significant ?

Response: Yes, these terms were significant, and we revised the expressions.

-Line 447-448 : There is also *M. obovata* / *M. hypoleuca*

Response: Thank you, we have added these.

-Line 631 : Is this script available ?

Response: Thank you, it is available, we still have this script. If you would like it, you are welcome to apply to write to the provided communication email and you will receive it soon.

-Table 1. contigs (typo)

Response: Thank you, we have revised this.

attached figure 1 chloroplast\_tree    attached figure 2 SNP\_tree

#### Reference

Cristofari R, Bertorelle G, Ancel A, et al. Full circumpolar migration ensures evolutionary unity in the Emperor penguin. *Nat Commun.* 2016;7:11842. doi: [org/10.1038/ncomms11842](https://doi.org/10.1038/ncomms11842).

Dai F, Zhuo X, Luo G et. al. Genomic Resequencing Unravels the Genetic Basis of Domestication, Expansion, and Trait Improvement in *Morus atropurpurea* [J]. *Adv. Sci.*, 2023 [<http://doi.org/10.1002/advs.202300039>]

Fukushima K, Pollock DD. Detecting macroevolutionary genotype–phenotype associations using error-corrected rates of protein convergence [J]. *Nat Ecol Evol.* 2023;7: 155–170. doi: [org/10.1038/s41559-022-01932-7](https://doi.org/10.1038/s41559-022-01932-7).

Hanson-Smith V, Kolaczkowski B, Thornton JW. Robustness of Ancestral Sequence Reconstruction to Phylogenetic Uncertainty [J]. *Mol Biol Evol.* 2010;27 (9):1988–1999. Doi: [org/10.1093/molbev/msq081](https://doi.org/10.1093/molbev/msq081).

Liu S, Zhang L, Sang Y et. al. Demographic History and Natural Selection Shape Patterns of Deleterious Mutation Load and Barriers to Introgression across *Populus* Genome [J]. *Mol. Biol. Evol.*, 2022, 39 (2). [<http://doi.org/10.1093/molbev/msac008>]

Ma H, Liu YB, Liu DT, et al. Chromosome-level genome assembly and population genetic analysis of a critically endangered rhododendron provide insights into its conservation [J]. *Plant J.* 2021;107(5):1533–45. doi: 10.1111/tj.15399.

Ma Z, Zhang Y, Wu L et. al. High-quality genome assembly and resequencing of modern cotton cultivars provide resources for crop improvement [J]. *Nat. Genet.*, 2021 [<http://doi.org/10.1038/s41588-021-00910-2>]

Molloy E K, Warnow T. To Include or Not to Include: The Impact of Gene Filtering on Species Tree Estimation Methods [J]. *Syst. Biol.*, 2017, 67 (2): 285–303 [<http://doi.org/10.1093/sysbio/syx077>]



|                                                                                                                                                                                                                                                                                                                                                                                                                                                                                                                                     |                                                                                                                                                                                                                                                                                                                                                                                                                                                                                                                                                                                                                                                                                                                                                                                                                                                                                                                                                                                                           |
|-------------------------------------------------------------------------------------------------------------------------------------------------------------------------------------------------------------------------------------------------------------------------------------------------------------------------------------------------------------------------------------------------------------------------------------------------------------------------------------------------------------------------------------|-----------------------------------------------------------------------------------------------------------------------------------------------------------------------------------------------------------------------------------------------------------------------------------------------------------------------------------------------------------------------------------------------------------------------------------------------------------------------------------------------------------------------------------------------------------------------------------------------------------------------------------------------------------------------------------------------------------------------------------------------------------------------------------------------------------------------------------------------------------------------------------------------------------------------------------------------------------------------------------------------------------|
|                                                                                                                                                                                                                                                                                                                                                                                                                                                                                                                                     | <p>Salojärvi J, Smolander OP, Nieminen K. et al. Genome sequencing and population genomic analyses provide insights into the adaptive landscape of silver birch [J]. Nat Genet. 2017;49:904–912. doi: org/10.1038/ng.3862.</p> <p>Shekhar S, Roch S, Mirarab S. Species Tree Estimation Using ASTRAL: How Many Genes Are Enough? [J]. IEEE/ACM Transactions on Computational Biology and Bioinformatics, 2018, 15 (5): 1738–1747 [http://doi.org/10.1109/TCBB.2017.2757930]</p> <p>Wang P, Zhou G, Jian J et. al. Whole-genome assembly and resequencing reveal genomic imprint and key genes of rapid domestication in narrow-leafed lupin [J]. Plant J., 2021, 105 (5): 1192–1210 [http://doi.org/10.1111/tpj.15100]</p> <p>Zhao XF, Ma YP, Sun WB, et al. High genetic diversity and low differentiation of <i>Michelia coriacea</i> (Magnoliaceae), a critically endangered endemic in southeast Yunnan, China [J]. Int J Mol Sci. 2012;13(4):4396–411. doi:https://doi.org/10.3390/ijms13044396.</p> |
| <b>Additional Information:</b>                                                                                                                                                                                                                                                                                                                                                                                                                                                                                                      |                                                                                                                                                                                                                                                                                                                                                                                                                                                                                                                                                                                                                                                                                                                                                                                                                                                                                                                                                                                                           |
| <b>Question</b>                                                                                                                                                                                                                                                                                                                                                                                                                                                                                                                     | <b>Response</b>                                                                                                                                                                                                                                                                                                                                                                                                                                                                                                                                                                                                                                                                                                                                                                                                                                                                                                                                                                                           |
| Are you submitting this manuscript to a special series or article collection?                                                                                                                                                                                                                                                                                                                                                                                                                                                       | No                                                                                                                                                                                                                                                                                                                                                                                                                                                                                                                                                                                                                                                                                                                                                                                                                                                                                                                                                                                                        |
| <p><b>Experimental design and statistics</b></p> <p>Full details of the experimental design and statistical methods used should be given in the Methods section, as detailed in our <a href="#">Minimum Standards Reporting Checklist</a>. Information essential to interpreting the data presented should be made available in the figure legends.</p> <p>Have you included all the information requested in your manuscript?</p>                                                                                                  | Yes                                                                                                                                                                                                                                                                                                                                                                                                                                                                                                                                                                                                                                                                                                                                                                                                                                                                                                                                                                                                       |
| <p><b>Resources</b></p> <p>A description of all resources used, including antibodies, cell lines, animals and software tools, with enough information to allow them to be uniquely identified, should be included in the Methods section. Authors are strongly encouraged to cite <a href="#">Research Resource Identifiers</a> (RRIDs) for antibodies, model organisms and tools, where possible.</p> <p>Have you included the information requested as detailed in our <a href="#">Minimum Standards Reporting Checklist</a>?</p> | Yes                                                                                                                                                                                                                                                                                                                                                                                                                                                                                                                                                                                                                                                                                                                                                                                                                                                                                                                                                                                                       |
| <b>Availability of data and materials</b>                                                                                                                                                                                                                                                                                                                                                                                                                                                                                           | Yes                                                                                                                                                                                                                                                                                                                                                                                                                                                                                                                                                                                                                                                                                                                                                                                                                                                                                                                                                                                                       |

All datasets and code on which the conclusions of the paper rely must be either included in your submission or deposited in [publicly available repositories](#) (where available and ethically appropriate), referencing such data using a unique identifier in the references and in the “Availability of Data and Materials” section of your manuscript.

Have you have met the above requirement as detailed in our [Minimum Standards Reporting Checklist](#)?

1     **The chromosome-scale genome of *Magnolia sinica* (Magnoliaceae)**  
2             **provides insights into the conservation of plant species with**  
3                     **extremely small populations (PSESP)**

4     **Lei Cai<sup>1,†</sup>, Detuan Liu<sup>1,2,†</sup>, Fengmao Yang<sup>1,2</sup>, Rengang Zhang<sup>1,2</sup>, Quanzheng**  
5             **Yun<sup>3</sup>, Zhiling Dao<sup>1</sup>, Yongpeng Ma<sup>1,\*</sup>, Weibang Sun<sup>1,\*</sup>**

6     <sup>1</sup> Yunnan Key Laboratory for Integrative Conservation of Plant Species with Extremely Small  
7     Populations/ Key Laboratory for Plant Diversity and Biogeography of East Asia, Kunming  
8     Institute of Botany, Chinese Academy of Sciences, Kunming, Yunnan, China

9     <sup>2</sup> University of Chinese Academy of Sciences, 100049 Beijing, China

10    <sup>3</sup> Department of Bioinformatics, Ori (Shandong) Gene Science and Technology Co., Ltd.,  
11    Weifang, Shandong, China

12

13    **Correspondence address.** Yongpeng Ma, E-mail: mayongpeng@mail.kib.ac.cn;

14    <http://orcid.org/0000-0002-7725-3677>; Weibang Sun, E-mail: wbsun@mail.kib.ac.cn;

15    <https://orcid.org/0000-0002-7195-2215>

16    <sup>†</sup>These authors contributed equally to this work.

17    Lei Cai [0000-0002-9251-2745];

18    Detuan Liu [0000-0002-2295-3799];

19    Fengmao Yang [0000-0001-8034-1398];

20    Rengang Zhang [0000-0002-8028-9208];

21    Zhiling Dao [0000-0002-9785-6336];

22    Yongpeng Ma [0000-0002-7725-3677];

23 Weibang Sun [0000-0002-7195-2215].

24 **Abstract**

25 *Magnolia sinica* (Magnoliaceae) is a highly threatened tree endemic to Southeast Yunnan, China. In  
26 this study, we generated for the first time a high-quality chromosome-scale genome sequence from  
27 *M. sinica*, by combining Illumina and ONT data with Hi-C scaffolding methods. The final  
28 assembled genome size of *M. sinica* was 1.84 Gb, with a contig N50 of ca. 45 Mb and scaffold N50  
29 of 92 Mb. Identified repeats constituted approximately 57% of the genome, and 43,473 protein-  
30 coding genes were predicted. Phylogenetic analysis show that the magnolias form a sister clade with  
31 the eudicots and the order Ceratophyllales, while the monocots are sister to the other core  
32 angiosperms. In our study, a total of 21 individuals from the five remnant populations of *M. sinica*,  
33 as well as 22 specimens belonging to eight related Magnoliaceae species, were resequenced. The  
34 results showed that *M. sinica* had higher genetic diversity ( $\theta_w = 0.01126$  and  $\theta_\pi = 0.01158$ ) than  
35 other related species in the Magnoliaceae. However, population structure analysis suggested that the  
36 genetic differentiation among the five *M. sinica* populations was very low. Analyses of the  
37 demographic history of the species using different models consistently revealed that two bottleneck  
38 events occurred. The contemporary effective population size of *M. sinica* was estimated to be 10.9.  
39 The different patterns of genetic loads (inbreeding and numbers of deleterious mutations) suggested  
40 constructive strategies for the conservation of these five different populations of *M. sinica*. Overall,  
41 this high-quality genome will be a valuable genomic resource for conservation of *M. sinica*.

42 **Keywords:** *Magnolia sinica*, PSESP, genome sequencing, deleterious mutation, population  
43 demographic, conservation

44

## 45 **1 Introduction**

46 The reduction of species diversity is of global concern, and has been closely linked with climate  
47 change and human activity. The conservation of biodiversity is therefore a hot topic [1–6]. The  
48 resolution of the recently convened CBD COP 15 (15th Conference of the Parties, Convention on  
49 Biological Diversity) supports biodiversity conservation issues of global concern, and one of the  
50 goals (so called “30 × 30”) requires that at least 30% of the land, fresh water and oceans on Earth  
51 be protected in some form by 2030. In addition, identification of geographic areas with high  
52 concentrations of endemic and rare species diversity is an important step in protecting biodiversity  
53 [7]. The Mountains of Southwest China is one of the world's biodiversity hotspots, and is also  
54 affected by climate change and human disturbance, meaning that it is also an area at very high risk  
55 of species extinction [8, 9]. The study and protection of the threatened species in this region are  
56 therefore of particular importance and urgency [10, 11]. In order to rescue the most highly threatened  
57 species and reduce their risks of extinction in this region, Chinese scholars put forward the concept  
58 of Plant Species with Extremely Small Populations (PSESP) in 2005, according to China's current  
59 national conditions and the practice of biodiversity protection [12–15]. That a species is threatened  
60 by human activities and interference is a necessary qualifying condition to determine whether that  
61 species meets the definition of PSESP, and human activities are also of significance when  
62 implementing rescuing protection for PSESPs [12, 16].

63 Plant genome sequencing has grown rapidly in the past 20 years, and by the end of June 2023,  
64 the genomes sequences of more than 1000 higher plant taxa had been published [17]. Sequenced  
65 genomes can provide insights and evidence to better understand the genome biology and evolution  
66 of plants [18, 19]. Although the genomes of so many plant species have been studied, only a few

67 studies have sequenced the genomes of threatened plant species (examples include *Acer yangbiense*,  
68 *Acanthochlamys bracteata*, *Beta patula*, *Cercidiphyllum japonicum*, *Davidia involucrata*,  
69 *Dracaena cambodiana*, *Ginkgo biloba*, *Kingdonia uniflora*, *Malaria oleifera*, *Ostrya rehderiana*  
70 and *Rhododendron griersonianum*) in order to focus on the conservation of these species [20–30].

71 Plant species in the family Magnoliaceae are hugely important in gardens and horticulture  
72 across the world [31, 32]. The Magnoliaceae is also one of the most highly threatened angiosperm  
73 groups. There are more than 300 species in this family, which are mainly distributed intermittently  
74 in the temperate, subtropical and tropical regions of East and Southeast Asia, East North America  
75 and central and South America [33–35]. About 120 species of Magnoliaceae are known from China,  
76 and Southwest and South China are the centers of diversity for this family [36]. Global conservation  
77 assessments suggest that 147 magnoliaceous species are facing threats, accounting for 48% of the  
78 total assessed species in this family [35]. Similarly, 76 species of Chinese Magnoliaceae are  
79 threatened, representing more than 50% of the total number of threatened Magnoliaceae species  
80 globally [37]. At present, in-depth genome research has only been conducted in four species in the  
81 Magnoliaceae (*Liriodendron chinense*, *Magnolia biondii*, *M. obovata* and *M. officinalis*), mainly to  
82 investigate the controversial evolutionary position of the magnoliids [38–41].

83 The evergreen tree *Magnolia sinica* (Law) Noot. (NCBI:txid86752) (Magnoliaceae) is a typical  
84 PSESP endemic to Southeast Yunnan, where many threatened species are in urgent need of rescue  
85 and protection [12, 14]. In China, the species is often referred to as *Manglietiastrum sinicum* Y.W.  
86 Law and is known as Huagaimu in Chinese [34, 36, 42, 43]. It has been categorized as Critically  
87 Endangered on the *China Species Red List* [44], *The Red List of Magnoliaceae* [35, 45] and *The*  
88 *Threatened Species List of China's Higher Plants* [37]. *M. sinica* was proposed as a first-rank plant

89 for national key protection in 1999 [46] and also in 2021 [47], and was listed as one of 62 PSESPs  
90 in Yunnan in 2010, and also as one of the 120 national PSESPs of China in 2012, requiring the most  
91 urgent rescue conservation [14, 15]. Recent survey data revealed only 52 individuals remaining in  
92 the wild, and comprehensive conservation research and protection action of *M. sinica* have been  
93 implemented, including reproductive and seed biology, genetic diversity studies based on SSR,  
94 sequencing of the chloroplast genome, investigation of the soil microbiome, *in situ* conservation, *ex*  
95 *situ* conservation and reintroduction programs [48–53]. Although great deal of protection and  
96 research action has been carried out, the lack of natural regeneration and genetic rescue still limits  
97 the protection of *M. sinica*. Therefore, the formulation of genetic rescue strategies for *M. sinica* will  
98 benefit greatly from the exploration of harmful cumulative mutations, population historical  
99 dynamics and effective population size from the whole genome level.

100 Here, we report a high-quality chromosome-scale genome sequence of *Magnolia sinica*, and  
101 compare it with other relevant published genomic data. By exploring the evolution of the genome,  
102 as well as the genetic characteristics, demographic history and genetic load of *M. sinica*, we have  
103 identified genomic factors that may contribute to the threats to this species, and, on the basis of this,  
104 we propose further strategies for the conservation of *M. sinica*.

## 105 **2 Materials and methods**

### 106 **2.1 Collection of plant material**

107 *Magnolia sinica* is only found scattered in several counties in southeast Yunnan (Figures 1 &  
108 3a). Fresh young leaf material was collected for whole-genome sequencing from a single individual.

109 This individual is conserved and growing *ex situ* at the Kunming Botanical Garden (KBG), but was  
110 originally introduced from Xichou County, Southeast Yunnan. For transcriptome sequencing, leaf,

111 stem and root samples were obtained from a three-year-old seedling also at KBG, and fresh fruits  
112 were collected from the wild in Jinping County, Yunnan. Fresh leaves used for genome library  
113 preparation, and other tissues used for transcriptome sequencing, were immediately frozen in liquid  
114 nitrogen and were stored at -78.5 °C in dry ice until DNA or RNA extraction. The remaining 21 leaf  
115 samples for re-sequencing were collected from the original species habitat in Xichou, Maguan and  
116 Jinping Counties from 2017 to 2019 (Table S1). Other DNA material from eight further species in  
117 the Magnoliaceae was used for comparison of genetic diversity and investigation of the phylogenic  
118 relationships. This DNA material was collected from specimens cultivated at KBG and the  
119 Germplasm Bank of Wild Species, Chinese Academy of Sciences (Table S2). After the leaves were  
120 collected, they were quickly packed in silica gel desiccant and stored in silica gel until re-sequencing.

## 121 2.2 Genome sequencing

122 Genomic DNA sequencing was performed using different sequencing platforms  
123 simultaneously to insure accurate assembly. (1) For ONT (Oxford Nanopore Technologies)  
124 PromethION sequencing, total DNA was extracted using the cetyltrimethylammonium bromide  
125 (CTAB) method [54] using a genomic DNA extraction kit (cat. no. 13323, Qiagen, Hilden,  
126 Germany). A NanoDrop™ One UV-Vis spectrophotometer (Thermo Fisher Scientific, USA) was  
127 then used to check DNA purity and a Qubit® 3.0 Fluorometer (Invitrogen, USA) was used to  
128 accurately quantify the DNA. After purification, the adapters from the LSK109 Ligation kit (cat. no.  
129 SQK-LSK109, Oxford) were used for the ligation reaction, and finally the Qubit® 3.0 Fluorometer  
130 (Invitrogen, USA) was used to quantify the constructed DNA library. The DNA library was  
131 subsequently transferred to NanoporePromethION (ONT, UK) for sequencing seven flow cells. (2)  
132 For Illumina sequencing, short-insert libraries were prepared using 2 µg of genomic DNA, and three



133 Illumina PCR-free libraries of 300–500 bp insertion size were constructed according to the standard  
134 manufacturer’s protocol using the DNaseq Library Index Kit (Hangzhou Kaitai Biotechnology, Co.,  
135 Ltd., Hangzhou, China). The whole-genomic libraries were sequenced on an Illumina Hiseq X Ten  
136 platform (RRID:SCR\_020131). (3) The Hi-C library was prepared by Beijing Ori-Gene Science and  
137 Technology Co., Ltd., Beijing, China. High molecular weight genomic DNA ( $\geq 700$  ng) was cross-  
138 linked *in situ*, extracted and then digested with a restriction enzyme. The DNA ends were then  
139 marked with biotin-14-dCTP, and the crosslinked fragments were blunt-end ligated. Fragments were  
140 sheared to a size of 200–600 bp with sonication. The Hi-C libraries were amplified using 12–14  
141 cycles of PCR, and were sequenced in Illumina HiSeq X Ten platform. (4) Transcriptome  
142 sequencing was performed on a PacBio Sequel (Pacific Biosciences, Menlo Park, CA, USA)  
143 platform (RRID:SCR\_017989) using full-length isoform sequencing (iso-seq) [55]. High-quality  
144 RNA was extracted with a Qiagen kit while a series of RNA samples were tested: Nanodrop was  
145 used to assess RNA purity, Qubit was used to precisely quantify the RNA, and an Agilent 2100  
146 Bioanalyzer was used to calculate RIN values and 28S/18S. Then a SMARTer<sup>®</sup> PCR cDNA  
147 Synthesis Kit was used to reverse transcribe the RNA into cDNA, The reverse transcription products  
148 were amplified using KAPA HiFi PCR Kits, and the amplified products were used to construct a  
149 SMRTbell library using a SMRTbell template prep kit 1.0. The third-generation sequencer Sequel  
150 was used to sequence the full-length cDNA to obtain high-quality transcriptome sequencing data.

### 151 **2.3 Genome assembly**

152 We obtained ~203 Gb (~100 $\times$ ) ONT reads, ~215 Gb (~110 $\times$ ) Illumina Hiseq reads, ~222b G  
153 Hi-C reads, and ~24 Gb iso-seq reads (Table S3–S6). The *de novo* genome assembly was first  
154 performed upon ONT reads using different assembly strategies. Briefly, the long noisy ONT reads

155 were first corrected with NextDenovo [56] and then assembled with SMARTDENOVO  
156 (RRID:SCR\_017622) [57] and WTDBG (assembly v0.2), respectively [58] (Table S7–9). Primary  
157 assembly v0.1 was selected as the optimal assembly due to the low error rate. Then, the Illumina  
158 sequencing reads were used to improve base-level accuracy of the assembly with Pilon [59]. The  
159 two draft assemblies (v0.1 as reference and v0.2 as query) were then merged using QuickMerge to  
160 improve continuity [60] and then polished again using pilon (Table S10–12). The GetOrganelle  
161 software was used to assemble the mitochondrial (parameters:-R 50 -k 67,87,107,127 -F  
162 embplant\_mt -w 125) and chloroplast (-R 15 -k 67,87,107,127 -F embplant\_pt -w 125) genomes,  
163 respectively, and Bandage was used for manually adjustment [61, 62].

164 Hi-C reads were mapped to the draft assembly with Juicer, and a candidate chromosome-length  
165 assembly was generated automatically using the 3d-DNA pipeline to correct mis-joins, order; and  
166 orientation, and to anchor contigs [63, 64]. Manual review and refinement of the candidate assembly  
167 was performed in Juicebox Assembly Tools (JBAT) for quality control and interactive correction  
168 [65]. To reduce the influence of chromosome interactions and to further improve the chromosome  
169 scale assembly, each chromosome was separately re-scaffolded with 3d-DNA, and was then  
170 manually refined with Juicebox (RRID:SCR\_021172). Finally, the chromosomal and unanchored  
171 sequences were generated, with the gap length set as 100 bp.

172 To fill the assembly gaps, LR\_Gapcloser (default parameters) was run for two rounds based  
173 on ONT reads, and then NextPolish (default parameters) was run for three rounds to polish the  
174 assembly based on Illumina reads [66, 67]. In order to eliminate redundancy and external source  
175 pollution: 1) Redundant was used to remove the redundant unanchored sequences (identity  $\geq 0.98$ )  
176 [68]; 2) Unplaced contigs with a length of less than 5 kb were removed; 3) The assembly was aligned

177 with the NT database [69] using BLASTN combined with coverage depth and GC content, to  
178 determine whether there was contamination from other species; and 4) Haplotigs or fragments with  
179 low average coverage depth (less than 75% of the peak depth) were removed with manual curation.  
180 The chromosomes were coded as chr01-chr19 according to their lengths (from long to short) (Fig  
181 2a, b). The numbers, lengths and proportions of the chromosomes, unanchored sequences, and  
182 chloroplast and mitochondrial sequences are summarized in Table S13.

#### 183 2.4 Assessment of genome assembly

184 The completeness of the final assembly was evaluated using BUSCO (RRID:SCR\_015008) and  
185 LAI (LTR Assembly Index) [66, 70]. KAT was used to compare the genome assembly and the  
186 Illumina reads (Fig S1). Bwa was used to map the Illumina reads to the genome and Minimap2 was  
187 used to map the third-generation ONT and PacBio transcriptome(iso-seq) CCS reads to the genome  
188 [71, 72]. The non-primary alignment was removed, so that each read only mapped once and the  
189 mapping ratio and coverage percentage were also calculated (Table S14). The coverage depth of  
190 single-copy and multi-copy core genes should be consistent with a Poisson distribution if without  
191 redundancy after checking (Fig S2). The second-generation reads were mapped to the genome with  
192 Bwa, and mutation sites were detected using SAMtools/BCFtools (RRID:SCR\_005227) [73]. The  
193 single base heterozygous sites were used to calculate the heterozygosity rate, and homozygous sites  
194 were used to calculate the error rate. Juicer was used to map the Hi-C data to the final genome  
195 assembly. The chromosome clustering heatmap of *M. sinica* was adequate, and there was no obvious  
196 chromosome assembly errors (Figure 2a, 2b) [64].

#### 197 2.5 Genome annotation

198 The repeat libraries were generated by *de novo* identification of the repeat region family using

199 the RepeatModeler software. LTR\_retriever (RRID:SCR\_017623) was also used to identify the  
200 intact LTR (long terminal repeat retrotransposons), and then a second library was clustered and  
201 generated [72]. After combining these two libraries directly, we used RepeatMasker  
202 (RRID:SCR\_012954) to identify repeated regions on the genome. Transcripts were generated  
203 following the process of isoseq3 [74] and were annotated to the genome using the PASA pipeline  
204 (RRID:SCR\_014656) [75]. The results were used to train an AUGUSTUS model for five rounds of  
205 optimization [76]. 154,904 non-redundant protein sequences from *Liriodendron chinense* [38],  
206 *Cinnamomum kanehirae* [77, 78], *Piper nigrum* [79], *Amborella trichopoda* [80] and *Arabidopsis*  
207 *thaliana* [81] were used as evidence of homologous proteins for gene annotation.

208 Gene structure annotation was conducted using the Maker2 pipeline [82]. Briefly, AUGUSTUS  
209 (RRID:SCR\_008417) was used to perform *ab initio* prediction of the genome with the repetitive  
210 regions masked out [76]. Transcripts were aligned with the genome using BLASTN  
211 (RRID:SCR\_001598), and BLASTX (RRID:SCR\_001653) was also used for aligning the protein  
212 evidence with the genome. Exonerate was used to optimize the alignments [83]. Based on the above  
213 three categories of evidence, hints files were generated, to allow AUGUSTUS to ultimately  
214 synthetically predict the gene models. AED (annotation edit distance) scores of each gene model  
215 were calculated according to the transcript and homologous protein evidence within the pipeline.  
216 Finally, false annotations in the coding frame and overly short ( $\leq 50$  AA) gene annotations were  
217 removed. The software tRNAScan-SE, Barnmap [84] and Rfamscan was used to annotate tRNA,  
218 rRNA and other non-coding RNA, respectively [85]. BUSCO was used to evaluate the integrated  
219 annotated proteins [70].

220 The functions of protein coding genes were annotated based on three strategies. Firstly, genes

221 were mapped with the eggNOG database using eggNOG-mapper to annotate gene function,  
222 including GO and KEGG annotation [86]. Secondly, for assignment based on sequence conservation,  
223 a diamond search of the protein sequences from several protein databases was performed, including  
224 the databases Swiss-Prot, TrEMBL, NR, and the *Arabidopsis* database [87]. Lastly, for assignment  
225 based on domain conservation, InterProScan was used to examine conserved amino acid sequences,  
226 motifs and domains of proteins by matching against sub databases of several InterPro databases,  
227 including CDD, PANTHER, PRINTS, Pfam, and SMART [88].

## 228 **2.6 Gene family identification and phylogenetic analysis**

229 OrthoFinder2 was used to infer orthogroups, with the parameters set to "-M msa" [89]. A  
230 protein alignment of 1070 orthogroups with minimum of 87.5% of species having single-copy genes  
231 in any orthogroup obtained from OrthoFinder2 was used to construct a phylogenetic tree using  
232 IQTREE, using a maximum likelihood method (the best model was JTT+F+R5, 1000 bootstrap  
233 replicates) [90]. In addition, ASTRAL was also used to infer the species tree based on 3841 gene  
234 trees with genes in at least 70% taxa being single-copy. MCMCTree, from the PAML package, was  
235 used to estimate species divergence time and the mutation rate in *M. sinica*, based on the codon  
236 alignment of 211 1:1 non-missing single-copy orthologous genes [91]. Four fossil calibration time  
237 points were chosen: stem Nymphaeaceae (113 Mya), stem Poaceae (55.8 Mya), stem Lauraceae  
238 (104 Mya), and stem Santalales (65.5 Mya) [92, 93]. The root time of the phylogenetic tree was set  
239 according to previous studies [92, 93]. Based on the time tree and 123,06 homologous gene families,  
240 CAFE was used to assess the expansion, contraction and rapid evolution of the gene families [94].

241 Based on the orthologous and paralogous gene relationships inferred with OrthoFinder2,  
242 collinearity between and within species was analyzed using MCScanX\_h [95]. According to the

243 collinear homologous gene pairs, the protein sequences were first aligned with MUSCLE [96], and  
244 then transformed into codon alignment with PAL2NAL [97]. Ka and Ks were then calculated  
245 between homologous gene pairs using KaKs\_Caculator v2.0 (YN model) [98, 99]. Polyploidization  
246 events and time were inferred based on collinearity in combination with the Ks value [99].

## 247 2.7 Genome mapping and SNP calling

248 A total of 43 samples, including 21 samples of *M. sinica* and 22 samples of a further eight  
249 *Magnolia* species, were sampled for whole genome resequencing (Table S1, S2). A total of 5,687  
250 million reads were produced across all samples. The raw data were filtered using fastp [100] to trim  
251 away the adaptors and low-quality regions. The cleaned reads were mapped to the reference genome  
252 using BWA-MAM [71] with the default parameters. The markup model in SAMtools [73] was  
253 used to mark and to remove duplicate reads. To improve the accuracy of the subsequent analyses,  
254 we only retained bases with a quality score > 20 and mapping quality > 30 (as the filter parameters  
255 in ANGSD and Freebayes). We removed the sites with a mapping depth across all samples of < 100  
256 or > 600 as well as the sites not mapped to chromosomes, using SAMtools. 1,585,988,829 sites  
257 (Dataset 1) from the BAM files were retained after quality control.

258 Freebayes (RRID:SCR\_010761) [101] was used to process SNPs calling for *M. sinica* and a  
259 total of 176,087,519 variable sites were obtained. The resulting SNP dataset was then filtered with  
260 vcftools (RRID:SCR\_001235) [102] using the following criteria: 1) sites with a genotype quality <  
261 20 or genotypes with depth < 5 were treated as missing; 2) non-biallelic and non-SNP sites; 3) SNPs  
262 with missing rate > 20% (Dataset 2: 11,438,677 SNPs); 4) SNPs with minor allele frequency (MAF)  
263 < 0.05 (Dataset 3: 8,149,323 SNPs).

## 264 2.8 Population genetics

265 PopLDdecay was used for linkage disequilibrium analysis across the *M. sinica* genome. The  
266 ThetaStat module in ANGSD (RRID:SCR\_021865) v0.93 [103] was used to assess genome wide  
267 diversity by calculating different estimators of  $\theta$ , including  $\theta_w$  (Watterson's  $\theta$ ) [104] and  $\theta\pi$   
268 (nucleotide diversity), and Tajima's  $D$  [105], and Fu and Li's  $D$  [106]. These statistics were  
269 calculated in a window size of 20 kb and a step size of 10 kb according to the result of LD decay,  
270 using Dataset 1 generated previously. Individual heterozygosity was also calculated in ANGSD  
271 v0.93 for *M. sinica* in our research.

272 For population structure analysis, we first used PLINK (RRID:SCR\_001757) [107] to remove  
273 linkage sites from Dataset 3 with the parameter "--indep-pairwise 50 10 0.2", and we obtained a  
274 total of 454,661 independent SNPs (Dataset 4). Dataset 4 was further used to explore the population  
275 structure of *M. sinica* using the program Admixture v1.3.0 [108], and the most likely number of  
276 genetic clusters (ancestor numbers, K) was selected based on 10-fold cross-validation error (CV)  
277 value. Fig S3 contains a schematic diagram showing how these datasets were generated.

## 278 **2.9 Ancestral sequence reconstruction**

279 We mapped data from several samples of other species of *Magnolia* and a sample of  
280 *Liriodendron* (Table S15) to the *M. sinica* genome using BWA-MEM with the default parameters.  
281 At the same time, we used freebayes to call the genotype with the same filter parameters as the SNP  
282 calling described above, except that "--report-monomorphic" was used to keep monomorphic  
283 genotypes in the output. Phylogenetic trees were constructed using IQtree with the substitution  
284 model MFP+ASC and using *Liriodendron chinense* as the outgroup. We then used an empirical  
285 Bayesian method in IQtree [90] to reconstruct the ancestral state of each site of each chromosome;  
286 this method can produce accurate ancestral sequence reconstruction [109] and has been previously

287 used to reconstruct ancestral state in other works [23, 110–112]. Finally, we reclassified the ancestral  
288 state according to the posterior probability of each site. Posterior probabilities  $\geq 0.95$  were classed  
289 as “high confidence”; lower probabilities were considered to be ambiguous and were marked as "N".  
290 The sequence from the crown group of *Magnolia* species were defined as ancestral state.

## 291 **2.10 Inference of demographic history**

292 A Stairway plot was used to infer the demographic history of *M. sinica* [113]. The mutation  
293 rate was estimated as  $1.2e-7$  per locus per generation which was constructed using MCMCTree  
294 based on the four-fold degenerated sites (4D sites) of orthologous genes. The generation time was  
295 set as 30 years, based on the cultivation records of this species in KBG. Dataset 1 was further filtered  
296 by removing the sites within 5 kb of gene regions to ensure site neutrality, and 897,314,345 genomic  
297 sites were retained (Dataset 5). The unfolded Site Frequency Spectrum (SFS) for *M. sinica* was  
298 estimated using the functions doSaf and realSFS in ANGSD v 0.921 [103] with Dataset 5 and the  
299 recommended filtering parameters “-minMapQ 30 -minQ 20”.

300 We also used the Pairwise Sequentially Markovian Coalescent (PSMC) model to reconstruct  
301 the demographic history of *M. sinica* [114]. Using the BAM files (Dataset 1) generated by BWA-  
302 MAM and the markup model in SAMtools [73], we made a consensus fastq file for each sample  
303 using SAMtools and BCFtools with the parameter set to -C50 to downgrade the mapping quality  
304 for reads containing excessive mismatches. The script vcfutils.pl was used to keep the minimum  
305 read depth to  $5\times$  and the maximum read depth to 50 for all individuals. The consensus fastq file was  
306 converted into an input file for PSMC using fq2psmcfa with the parameter -q 20 set, to remove  
307 consensus calls with qualities  $\leq 20$ . The PSMC analysis was run using default values for the upper  
308 limit to assign a date to most recent common ancestor (-t 15) and theta/rho (-r 5). The atomic time



309 interval pattern (-p) was set to “4+30\*2+4+6+10”. We plotted the results using the same mutation  
310 rate and generation time as described above.

311 The contemporary effective population size of *M. sinica* was assessed using the linkage  
312 disequilibrium method in NeEstimator V2 [103] with the reduced Dataset 4 (filtered by vcftools  
313 with --max missing 0.95 and --thin 60000) to ensure accuracy [115].

## 314 **2.11 Estimation of deleterious mutations and inbreeding**

315 Accumulation of deleterious mutations is likely to impact species fitness. The Sorting  
316 Intolerant from Tolerant (SIFT) algorithm [116] was used to predict deleterious mutations, with the  
317 ancestral sequences reconstructed above as a reference. The TrEMBL plant database [117] was used  
318 to search for orthologous genes. After polarization of Dataset 2, protein-coding variants of 8,896,099  
319 retained SNPs were categorized as nonsynonymous or synonymous sites. Nonsynonymous sites  
320 were further divided into deleterious (SIFT score <0.05), and tolerated (SIFT score ≥0.05) based on  
321 their SIFT score [118]. We also calculated the derived allele frequency (DAF) of deleterious  
322 mutations.

323 In addition, frequency of runs of homozygosity (FROH) has been used as a robust estimate of  
324 genomic inbreeding [119] and was estimated following previous research [120, 121]. Briefly, runs  
325 of homozygosity (ROH) were first identified based on Dataset2 using vcftools v0.1.17 with  
326 parameter "--LROH " [102], then FROH was calculated with the total length of ROH divided by the  
327 genome size of *M. sinica*.

## 328 **Results**

### 329 **3.1 Genome sequencing and assembly**

330 The libraries sequenced on the ONT PromethION platforms using seven cells resulted in the

331 generation of a total of 9.11 million reads with ~202.85 Gb sequencing data (~100×), with an  
332 average read length of 22 kb (the longest read was 194 kb, and N50 was 25 kb) (Table S3). A total  
333 of 1,432 million reads were generated with ca. 214.95 Gb (~110×) data using the Illumina HiSeq  
334 platform (Table S4). A total of 1,480 million reads with ca. 222.13 Gb data were produced with Hi-  
335 C sequencing (Table S5). Through the optimal assembly method, the final size of the assembled *M.*  
336 *sinica* genome was 1.84 Gb, which was similar to the 1.9 Gb genome size estimated using k-mers  
337 (Figure S4, Table S10, S11). A total of 108 contigs (1.82 Gb, accounting for 99.08% of the whole  
338 genome) with an average size of 15 Mb were anchored onto the 19 chromosomes. The contigs N50  
339 of the *M. sinica* genome was ca. 45 Mb and the scaffold N50 ca. 92 Mb, both of which were much  
340 higher than those of other previously reported magnolia genomes (Table 1) [37–40]. In addition, the  
341 mitochondrial and chloroplast genomes were assembled into circular DNA molecules of 856,922  
342 bp and 160,070 bp, respectively. The LAI value was estimated to be 10.3 based on LTR, indicating  
343 that the gene integrity was relatively good (Table S11, S12). We also calculated that the  
344 heterozygosity rate in *M. sinica* was about 1.21%, and that the error rate was about 0.0072%.

345 1,580 (97.9 %) complete BUSCO genes, including 1,522 (94.3 %) complete and single-copy  
346 genes and 58 (3.6 %) complete and duplicated genes were identified among the 1,614 total BUSCO  
347 groups. However, 8 (0.5 %) genes were found to be fragmented and 26 (1.6 %) genes were missing  
348 based on the BUSCO analysis (Table S11).

### 349 3.2 Genome annotation

350 A total of 2,329,558 repetitive sequences were identified in the *M. sinica* genome, with a total  
351 length of ~1.05 Gb, and accounting for 56.99 % genome. Of these, the highest proportion was LTR,  
352 accounting for 48.9% of the whole genome (Table S16). The most abundant repeat element families

353 were Copia (388,301, 14.88 %) and Gypsy (759,932, 27.40 %) (Table S16). A total of 18 million  
354 subreads with ~24.58 Gb data were generated from transcriptome sequencing, from which 43,473  
355 protein-coding genes were annotated (Table S6, S17). The mean lengths of gene region, transcript,  
356 and coding DNA sequences were 11,297, 1,552, and 1,091, respectively (Table S17). Moreover, 71  
357 rRNA, 658 tRNA, and 511 ncRNA sequences were identified (Table S18). A total of 38,041 genes  
358 were annotated using GO (14,360, 33.03 %), KEGG (14,937, 34.36 %), eggNOG (29,585, 68.05 %)  
359 and COG (31,414, 72.26 %). Based on sequence conservation, several protein databases, including  
360 Swiss-Prot (21,220, 48.81 %), TrEMBL (31,720, 72.96 %), NR (31,242, 71.87 %) and *Arabidopsis*  
361 *thaliana* (25,007, 57.52 %) were annotated with diamond. For assignment based on domain  
362 conservation, certain other database, including Pfam (25,850, 59.46%), Coils (2,533, 5.83%), CDD  
363 (28,110, 64.70%), SMART (8,247, 18.97%) and others were annotated with InterProScan. (Table  
364 S19)

### 365 3.3 Analysis of phylogeny, collinearity and WGD

366 In order to investigate the early evolution of the core angiosperms, we identified 579,290  
367 homologous genes belong to 20,538 gene families from the 18 related genomes using OrthoFinder2  
368 (Fig S5). A total of 1,266 expanded and 1,276 contracted gene families in *M. sinica* were identified  
369 and annotated (Fig 2c). A maximum likelihood tree was constructed using 1,070 orthogroups of 18  
370 species. As shown in the ML phylogenetic tree (Fig 2c), magnolias formed a sister relationship with  
371 both the eudicots and the Ceratophyllales, while the monocots were sister to the other core  
372 angiosperms. The Magnoliales and the Laurales were predicted to have diverged from the Piperales  
373 at ca. 149.3 Ma (137.7–160), a result which was slightly different from that of a whole-genome  
374 study of black pepper, in which the differentiation time was estimated at 175–187 Ma [79]. The

375 Magnoliales were predicted to have diverged from the Laurales at ca. 122.2 Ma. In the Magnoliales,  
376 the estimated differentiation time of the genera *Magnolia* and *Liriodendron* was predicted to be 23.4  
377 Ma, and within *Magnolia*, the closely related species *M. sinica* and *M. biondii* are estimated to have  
378 diverged ca. 10.9 Ma.

379 A total of 7,807 colinear gene pairs on 779 colinear blocks were inferred within the *M. sinica*  
380 genome. The collinearity depth ratio between *M. sinica* and *Liriodendron chinense* was 1:1 (Figure  
381 S6), indicating that the two species have no species-specific whole-genome duplication (WGD)  
382 events. Collinearity between these two species and earlier differentiated dicotyledons such as grapes  
383 was always 2:3 (Figure S7, S8), indicating that *M. sinica* and *L. chinense* experienced a WGD event  
384 after differentiation from the eudicots which is consistent with the conclusions of the study  
385 investigating *L. chinense* [38]. Similarly, the collinearity with the early angiosperms *Amborella*  
386 *trichopoda* and *Nymphaea tetragona* was 2:1 and 2:2 (Figure S9, S10), respectively, which indicates  
387 that *M. sinica* and *L. chinense* only experienced a single shared WGD event after their differentiation  
388 from these plants. From the paralogous collinearity block in *M. sinica*, it can be seen that this WGD  
389 event occurred at a Ks value of about 0.75. Based on the chromosome tree analysis, the  
390 Magnoliaceae and the Lauraceae share a WGD event, but this is not shared with pepper. After  
391 differentiation from other species, the Magnoliaceae (*M. sinica* and *L. chinense*) experienced a  
392 single WGD event, the Lauraceae (*Cinnamomum kanehirae*) experienced two WGD events, and  
393 pepper experienced three WGD events.

#### 394 3.4 Genome wide diversity and population structure

395 After filtering out low quality reads and adapter sequences, 5,386 million reads remained for  
396 processing (Table S20). The sequencing depth of *M. sinica* samples ranged from 8.8× to 12.6×, with

397 a mean value of 10.5×, and were between 10.8–14.3× for the other eight *Magnolia* species (Table  
398 S20). The mapping rates of *M. sinica* ranged from 90.80% to 99.70%, with a mean value of 97.63 %,  
399 and were 95.30%–99.53% for the other eight *Magnolia* species (Table S20).

400 The mean heterozygosity rate of *M. sinica* was (1.29 ± 0.07) % (Table S21), ranging from 1.12 %  
401 to 1.38 %, and the trees with the lowest and the highest heterozygosity rates were both found in the  
402 XZQ population. The MAD population had the lowest heterozygosity (1.19 %), while the DLS  
403 population had the highest heterozygosity (1.32 %).

404 Nucleotide diversity in *M. sinica* was estimated using two parameters. Watterson's  $\theta$  ( $\theta_w$ ) and  
405 genome wide diversity ( $\theta\pi$ ) of *M. sinica* were calculated as 0.01416 and 0.01494, respectively  
406 (Table S22). When compared with other species, *M. sinica* was found to have higher genetic  
407 diversity (Table S23), and was approximately 12 folds higher than that of *Liriodendron chinense*  
408 (0.00123) [38].

409 The population structure results showed that the CV error was smallest when there was an  
410 optimal number of clusters  $K = 1$  (Figure S11), suggesting low genetic differentiation among  
411 populations of *M. sinica*. Low genetic differentiation among populations was further suggested by  
412 the low  $F_{st}$  statistics between population pairs of *M. sinica*, which had a mean value of 0.133. We  
413 have given the structure results for  $K = 2$  and  $K = 3$  in Figure 3b. At  $K = 2$ , all the populations of *M.*  
414 *sinica* could be separated into three components, including an XZQ component (blue), the  
415 component (orange) from the FD population, and two individuals (KIBDZL15301 and  
416 KIBDZL15303) from the DLS population, as well as a mixture component. When  $K = 3$ , the FD  
417 population was further separated into two components, including an FD component and a mixture  
418 component. Both the XZQ and FD populations were genetically “pure” from the other *M. sinica*

419 populations. The MAD and MC populations were genetically similar irrespective of *K*.

### 420 **3.5 Demographic history**

421 The demographic history of *M. sinica* inferred by Stairway plot2 indicate three significant  
422 population declines, two of which were also detected by PSMC (Figure 3c). In the scenario inferred  
423 from Stairway plot2, the earliest population decline occurred at 1.3 Ma and continued until 1.1 Ma.  
424 For the scenarios inferred by the PSMC, the earliest population decline occurred at 1.5 Ma and  
425 continued until 0.8 Ma. After this, the population of *M. sinica* is predicted to have experienced a  
426 period of recovery in both scenarios. The second population decline occurred at about 0.3 Ma in  
427 both scenarios. After that, the population of *M. sinica* exhibited recovery in the scenario inferred by  
428 Stairway plot2, but experienced a continuing decline in PSMC. The latest population bottleneck in  
429 both scenarios occurred at about 20 Ka and continued until 10 Ka, when the effective population  
430 size of *M. sinica* dropped to 1,936 in the Stairway plot and 1,784 in PSMC. However, after 10 ka,  
431 the effective size of the *M. sinica* population recovered in Stairway plot, but showed continuous  
432 decline in PSMC. The contemporary effective population size of *M. sinica* estimated by  
433 NeEstimator was 10.9 (3.3–43.7 Jackknife CI).

### 434 **3.6 Genetic load and genomic inbreeding coefficient**

435 1,196,374,340 high confidence loci were obtained and used as ancestral sequences to predict  
436 deleterious mutations. 16,131, 74,385 and 36,827 sites were predicted to be deleterious,  
437 synonymous and tolerated, respectively, in the 21 re-sequenced *M. sinica* individuals (Table S24).  
438 The mean value of derived homozygous deleterious alleles (HoDA) was 249, ranging from 190 to  
439 298, with the lowest found in the MC population, which had a mean number of 207 (190–216), and  
440 the highest found in XZQ, which had a mean number of 258 (220–298) (Table S25). The MAD

441 population also harbors a very high number of HoDA (246), and this population had highest  
442 proportion of private HoDA (118, 48%) when compared with other populations (Figure 3d, Table  
443 S25). None of the HoDA was shared among all five of these populations. An average of 2,607  
444 heterozygous deleterious alleles (HeDA) was detected in *M. sinica*, ranging from 2,136 to 2,967.  
445 The highest number of HeDA was found in the XZQ population, which had a mean value of 2,593  
446 (2,136–2,967) (Table S25), while the lowest number of HeDA was found in the MAD population  
447 (2,430). The MAD population shared the highest HeDA with the MC population, and shared the  
448 lowest HeDA with XZQ. None of the HeDA was shared among all five of the populations (Table  
449 S25). The derived allele frequency (DAF) of approximately 32.35% of the deleterious mutations  
450 was < 0.05, and all these rare deleterious mutations were heterozygous. Only ~7.1% (1147/16131)  
451 of the deleterious mutations were homozygous (DAF > 0.05) (Figure S12).  
452 At the population level, the mean value of FROH in *M. sinica* was  $0.11 \pm 0.04$ , ranging from 0.08  
453 to 0.16, with the lowest value found in the DLS population, and the highest value found in MAD.  
454 At the individual level, one individual (KIBDZL15801) from the XZQ population showed the  
455 lowest levels of inbreeding, and had the lowest FROH value (0.06). The individual (KIBDZL15803)  
456 with the largest FROH value (0.21) was also found in XZQ population (Table S25).4.

## 457 DISCUSSION

458 To date, only four species in the Magnoliaceae (*Liriodendron chinense*, *Magnolia officinalis*,  
459 *M. obovata* and *M. biondii*) have been the objects of in-depth genomic research, and this has been  
460 mainly from the perspective of confirming the phylogeny of the angiosperms, investigation of  
461 species differentiation and the biosynthesis of terpenoids. To date, no species in the family  
462 Magnoliaceae have been studied at a genome-wide level from the perspective of conservation [38–

463 [41]. From the aspect of conservation genomics, we report high-quality whole-genomic data from *M.*  
464 *sinica* (1.84 Gb with contigs N50 of ca. 45 Mb). This is superior to the data available from  
465 *Liriodendron chinense* (1.74 Gb with contigs N50 of ~1.43 Mb) [38], *Magnolia officinalis* (1.68 Gb,  
466 with contigs N50 of 0.22 Mb) [40], *M. obovata* (1.64 Gb, with contigs N50 of 1.71 Mb) [41] and  
467 *M. biondii* (2.22 Gb with contigs N50 of 0.27 Mb) [39].

468       The early evolution of the core angiosperms has been studied with whole-genome analysis of  
469 certain species of Magnoliids and Chloranthales [39, 77, 120, 122–125]. However, the phylogenetic  
470 relationships between the Magnoliids on the early branch of the angiosperm lineage and the eudicots  
471 and monocots have been controversial and not fully resolved [124, 125]. Our genome level  
472 phylogenetic tree suggests that the magnolias form a sister group to the eudicots and the  
473 Ceratophyllales, while the monocots are sister to the other core angiosperms. This is consistent with  
474 the results of a study into Chloranthales [120, 124], but inconsistent with the relevant results of *M.*  
475 *biondii*, *M. hypoleuca* and *M. officinalis* [39–41]. The evolutionary history of the angiosperms was  
476 accompanied by frequent WGD events. However, evidence of WGD events was inferred from dot  
477 plots and Ks, which is insufficient to demonstrate whether any two species very close to  
478 differentiation share a WGD event. In our study, we concatenated homologous genes to construct a  
479 chromosome-level synteny tree to make our inferences more reliable. Our inference results suggest  
480 that WGD events also occurred after the differentiation of the magnoliids from other groups, which  
481 is in agreement with other studies [125].

482       Genetic diversity is essential to allow species evolution in response to environmental changes,  
483 and has been predicted to be positively correlated with species fitness and evolutionary potential  
484 [126]. We found that *M. sinica* had relatively high genetic diversity, which is consistent with



485 previous research based on SSR markers [49]. This high diversity could be explained by the fact  
486 that, as a tree species, *M. sinica* has a long life span (ca. 30 years). De Kort et al. (2021) [127]  
487 compared the genetic diversity of 164 annuals, 1,405 perennials, 308 shrubs and 2,337 trees, and  
488 found that although species level diversity is lower for long-lived or low-fecundity species than for  
489 short-lived or high-fecundity species, population level genetic diversity is usually higher for long-  
490 living plants, as they may respond more slowly to reduced gene flow. Another reason for this high  
491 diversity could be that *M. sinica* is found in southern subtropical monsoon broadleaved evergreen  
492 forests [5, 48]. Species around the equator are expected to have higher population-level genetic  
493 diversity than other species. This is because in theoretical prediction analyses, the abundant  
494 precipitation around the equator shows a significant relative contribution to population genetic  
495 diversity, although the exact mechanisms and extent of this are still unknown [128]. Moreover, the  
496 pollinator-dependent pollination system may contribute to the high genetic diversity in *M. sinica*  
497 [49].

498 *M. sinica* has low genetic differentiation between subpopulations, which could be attributed to  
499 higher gene flow among subpopulations, despite the fragmented distribution of the species [49]. The  
500 species has an outcrossing mating system, which is pollinator dependent, and two species of beetles  
501 appear to be effective pollinators [5, 48]. Previous research has demonstrated that some beetles can  
502 fly up to 12 km [128]. Long-distance pollen-mediated gene flow among populations may decrease  
503 population genetic differentiation [129]. The smaller FROH and lower inbreeding load in *M. sinica*  
504 compared with *Acer yangbiense* may also indicate the existence of certain gene flow among its  
505 isolated populations [121], or from other populations which we have not found. As most of the  
506 reported populations of *M. sinica* are found on the borders of China with other countries, it is not

507 unreasonable to suggest that other unreported individuals or populations exist outside China.

508 Southeast Yunnan is an important biodiversity hotspot [130], and is shielded by the Ailao  
509 Mountains from the climate fluctuations caused by glaciation and the uplift of the Himalayas and  
510 the Hengduan Mountains [131]. From the geological point of view, there is no evidence that  
511 Southeast Yunnan was affected by the Quaternary ice age, and simulations of climate data suggest  
512 that this area was not seriously affected by the global temperature drop [132]. In our results,  
513 Stairway plot2 detected major population declines, which is similar to the inferred demographic  
514 history of the sympatric *Magnolia fistulosa* [133]. Each *M. sinica* population decline inferred in the  
515 Stairway plot could be verified in PSMC (Figure 3c). However, the demographic history of *M. sinica*  
516 inferred by Stairway plot2 shows population rebound after each decline, which was not obvious in  
517 the PSMC analysis. Moreover, the Stairway plot can estimate very recent events, while PSMC  
518 estimates only up to 10,000 years ago (Figure 3c). The earliest inferred population decline occurred  
519 1.0–1.2 Ma, which is consistent with the mid-Pleistocene transition [134]. Population declines at a  
520 similar time are also reflected in other sympatric species such as *Acer yangbiense* [121], and  
521 *Buddleja alternifolia* [120]. The second population decline occurred at 0.3 Ma, during which global  
522 temperature experienced a general decline [135]. The latest population decline occurred at ca. 20  
523 Ka, and may have been caused by the Last Glacial Maximum (19.0–26.5 Ka) [136]. Multiple  
524 population declines may have resulted in a narrow distribution of *M. sinica*, and the stable  
525 population sizes from about 1 ka inferred in the Stairway plot may be as a result of the very recent  
526 large-scale anthropogenic land development and land use changes in the habitat of *M. sinica*, and is  
527 likely to have been responsible for the extremely rare status of this species [27], this is also  
528 consistent with the characteristics of high genetic diversity and low genetic differentiation of this

529 species. Genetic differentiation tends to be lower among populations separated in recently than those  
530 isolated from historical, especially for species with long generation times [137]. *M. sinica* has a  
531 pollinator-dependent outcrossing mating system, which may contribute to its high genetic diversity;  
532 while high gene flow among populations may maintain links between populations of this species,  
533 and may contribute to its low genetic differentiation. The recent reduction in population size due to  
534 anthropogenic activities has led to isolation state of the populations, leading to the high genetic  
535 diversity and low genetic differentiation now observed in the fragmented populations of this  
536 endangered tree species. Similar patterns have been reported in *Michelia coriacea*, another species  
537 in the Magnoliaceae [138].

538         The MAD population contains only a single remnant individual with a higher level of  
539 inbreeding (FROH = 0.16), lower heterozygosity rate (1.19%) and higher homozygous deleterious  
540 allele number (246) than other populations. Gene flow has been proposed as a potential strategy to  
541 sustain small and isolated populations, by masking of deleterious alleles [139]. We found that the  
542 DLS population had a higher heterozygosity rate (1.32%) and shared few homozygous deleterious  
543 mutations with tree from the MAD population. The DLS population could therefore serve as source  
544 material for breeding, which could be used to mask homozygous deleterious mutations in future  
545 MAD population individuals. Methods such as population reinforcement, hand pollination to assist  
546 pollen flow (by collecting pollen from the DLS population and pollinating the MAD population),  
547 or the transplantation of seedlings from the DLS population into MAD could also be considered.  
548 Similarly, an individual (KIBDZL15801) in the XZQ population also had a higher heterozygosity  
549 rate (1.37%), and a smaller number of HoDA (220) than the MAD population. Pollen from  
550 KIBDZL15801 could therefore be used to assist gene flow to KIBDZL15803 and KIBDZL15807,

551 two other individuals from the XZQ population with lower heterozygosity rates (1.12 % and 1.16 %,  
552 respectively) and higher numbers of HoDA (298 and 286, respectively).

553 The identification of a management unit (MU) is essential for the management of natural  
554 populations [140]. The FD population was genetically pure, and had no admixture with other  
555 populations even when  $K = 2$  and  $K = 3$ . This could be attributed to its distance from the other  
556 populations (about 66–145 km), which may decrease opportunities for pollen flow. Similarly,  
557 population XZQ was also found to be genetically pure at  $K = 2$  and  $K = 3$ . We therefore suggest that  
558 the FD and XZQ populations be treated as two separate evolutionarily significant units (ESU). The  
559 MAD and MC populations were genetically similar at all values of  $K$ , and we suggest that they be  
560 treated as another ESU. Importantly, however, the MAD and MC populations are found outside any  
561 existing nature reserves, and it is therefore necessary to include these populations in a nature reserve  
562 or to establish specific conservation regions to protect them.

563 The main threats currently faced by *Magnolia sinica* are as follows: (1) Substantial reduction  
564 and loss of the original habitat leading to severe habitat fragmentation and population isolation; (2)  
565 The large-scale planting of *Amomum tsaoko* under forest cover means that *M. sinica* is unable to  
566 regenerate naturally in the wild, and there are no seedlings; (3) Excessive artificial seed collection.  
567 Fortunately, since 2005, because this plant is a critically endangered flagship species,  
568 comprehensive scientific research, including reproductive and seed biology, conservation genetics,  
569 and protection measures including field investigations, *in situ* conservation, *ex situ* conservation,  
570 and reintroduction have been gradually implemented [14, 48, 50, 51, 53]. At present, in addition to  
571 the existing protection measures, strengthening of the management of nature reserves and reduction  
572 of the disturbance by human activities in the original habitats of wild populations are urgently

573 needed. In particular, it is necessary to stop the large-scale planting of commercial crops (*Amomum*  
574 *tsaoko*) under these forests, which is important to restore their natural regeneration in the wild.  
575 Unlike most of the severely threatened species, *M. sinica* has high genetic diversity and low genetic  
576 differentiation which is also consistent with research into other endangered species in the  
577 Magnoliaceae [133, 141–143]. However, considering that the generation time of *M. sinica* can be  
578 as long as 30 years, the isolation of the various populations, the serious habitat fragmentation, and  
579 that there are very few wild individuals, we still need to consider potential future inbreeding  
580 depression. More artificial outcrossing strategies should be designed in the future to reduce the loss  
581 of genetic diversity caused by inbreeding, and that these strategies should be considered instead of  
582 collecting seeds and simply breeding more individuals [26]. Our genomic study into *M. sinica*  
583 provides an example of high genetic diversity and low genetic differentiation in a long-lived tree  
584 species and informs the future formation and maintenance of conservation strategies necessary for  
585 the survival of such a PSESP.

586

#### 587 **Data availability statement**

588 The genome assembly, annotations, and other supporting data are available via the *GigaScience*  
589 database GigaDB [144]. The raw sequence data have been deposited in the Short Read Archive  
590 under NCBI BioProject ID PRJNA774088. The raw data, genome assembly and gene annotation  
591 have also been deposited at National Genomics Data Center, China National Center for  
592 Bioinformation under BioProject accession number PRJCA015437.

593

#### 594 **Additional Files**

595 Figure S1. K-mer spectrum analysis.

596 Figure S2. Evaluation of the distribution of coverage depth over the whole genome and the BUSCO  
597 core gene region with Illumina and ONT data.

598 Figure S3. A schematic diagram showing how these datasets were generated.

599 Figure S4. Kmer frequency distribution diagram.

600 Figure S5. Maximum-likelihood (ML) phylogeny of *Magnolia sinica* and related taxa showing  
601 bootstrap values. Bar, substitutions per site.

602 Figure S6. The collinearity between *M. sinica* and *Liriodendron chinense*.

603 Figure S7. The collinearity between *M. sinica* and *Vitis vinifera*.

604 Figure S8. The collinearity between *Liriodendron chinense* and *Vitis vinifera*.

605 Figure S9. The collinearity between *Amborella trichopoda* and *M. sinica*.

606 Figure S10. The collinearity between *Nymphaea colorata* and *M. sinica*.

607 Figure S11. Cross validation error (CV) based on Admixture output.

608 Figure S12. Deleterious allele frequency distribution of homozygous deleterious SNPs.

609 Table S1. Collection information for the 21 re-sequenced samples of *Magnolia sinica*.

610 Table S2. Collection information for the other eight Magnoliaceae re-sequencing samples.

611 Table S3. WGS-ONT sequencing statistics.

612 Table S4. WGS-Illumina sequencing statistics.

613 Table S5. HiC sequencing statistics.

614 Table S6. Iso-Seq sequencing statistics.

615 Table S7. Assembly statistics (V0.1).

616 Table S8. Assembly statistics (V0.2).

- 617 Table S9. Assembly statistics (V0.3).
- 618 Table S10. Assembly statistics (V1.0).
- 619 Table S11. Assembly statistics (V1.1).
- 620 Table S12. Statistics of all assemblies.
- 621 Table S13. Information pertaining to the chromosomes, unanchored sequences, chloroplasts and  
622 mitochondria.
- 623 Table S14. The mapping ratio and coverage percentage of re-sequencing data.
- 624 Table S15. Sequences used to construct ancestral states.
- 625 Table S16. Repetitive sequences statistics.
- 626 Table S17. Final gene set statistics.
- 627 Table S18. Statistics of the source of integration annotation.
- 628 Table S19. Gene annotation statistics.
- 629 Table S20. Genome mapping statistics of sequencing data.
- 630 Table S21. Statistics of heterozygosity rate.
- 631 Table S22. Mean population fixation index and corresponding spatial distance.
- 632 Table S23. Genome wide diversity of woody species.
- 633 Table S24. SIFT (Sorting Intolerant From Tolerant) prediction of deleterious mutations.
- 634 Table S25. Genetic load of 21 individuals of *Magnolia sinia*.

635

## 636 **Abbreviations**

- 637 AED: annotation edit distance; Blast: Basic Local Alignment Search Tool; BUSCO: Benchmarking  
638 Universal Single-copy Orthologues; CBD COP 15: 15th Conference of the Parties, Convention on

639 Biological Diversity; DAF: derived allele frequency; ESTs: Expressed sequence tags; FROH:  
640 frequency of runs of homozygosity; GO: gene ontology; HeDA: heterozygous deleterious alleles;  
641 HoDA: homozygous deleterious alleles; JBAT: Juicebox Assembly Tools; KBG : Kunming  
642 Botanical Garden; KEGG: Kyoto Encyclopedia of Genes and Genomes; ONT: Oxford Nanopore  
643 Technologies; LAI: LTR Assembly Index; LTR: long terminal repeat retrotransposons; MAF: minor  
644 allele frequency; PSESP: Plant Species with Extremely Small Populations; PSMC: Pairwise  
645 Sequentially Markovian Coalescent; ROH: runs of homozygosity;  $\theta_w$ : Watterson's  $\theta$ ;  $\theta\pi$ : nucleotide  
646 diversity; SFS: Site Frequency Spectrum; SIFT: Sorting Intolerant from Tolerant; SMRT: Single  
647 Molecule Real-Time; WGD: whole-genome duplication.

#### 648 **Competing interests**

649 The authors declare no competing interests.

#### 650 **Authors' contributions**

651 Y.P.M. and W.B.S. conceived and designed the study; R.G.Z., L.C., D.T.L. F.M.Y. and Q.Z.Y.  
652 analyzed the data; L.C., D.T.L. and F.M.Y. wrote the manuscript; Y.P.M., Z.L.D. and W.B.S. revised  
653 the manuscript. All authors reviewed and approved the final manuscript.

#### 654 **Acknowledgments**

655 We thank Li-Dan Tao, Pin Zhang, Jia-Jun Yang, Rong-Li Liao for their help in collecting materials,  
656 and we thank Li-Sen Qian for helping to write the R script.

#### 657 **Funding**

658 This work was supported by the National Science & Technology Basic Resources Investigation  
659 Program of China (Grant No. 2017FY100100); Yunnan Fundamental Research Projects (Grant No.  
660 202101AT070173); National Natural Science Foundation of China (NSFC) (Grant No. 32101407);



661 and the National Natural Science Foundation of China (NSFC) – Yunnan Joint Fund (Grant No.  
662 U1302262).

663

#### 664 **References**

- 665 1. Berry PM, Fabók V, Blicharska M, et al. Why conserve biodiversity? A multi-national  
666 exploration of stakeholders' views on the arguments for biodiversity conservation.  
667 *Biodivers Conserv.* 2018;**27**(7):1741–62. doi: 10.1007/s10531-016-1173-z.
- 668 2. Chen GS. Analysis on biodiversity conservation in the pluralistic vision. *Advanced*  
669 *Materials Research.* 2012;**518-523**:4980–4. doi: 10.4028/www.scientific.net/AMR.518-  
670 523.4980.
- 671 3. Isbell F, Gonzalez A, Loreau M, et al. Linking the influence and dependence of people on  
672 biodiversity across scales. *Nature.* 2017;**546**(7656):65–72. doi: 10.1038/nature22899.
- 673 4. Johnson CN, Balmford A, Brook BW, et al. Biodiversity losses and conservation responses  
674 in the Anthropocene. *Science.* 2017;**356**(6335):270–5. doi: 10.1126/science.aam9317.
- 675 5. Meng HH, Zhou SS, Li L, et al. Conflict between biodiversity conservation and economic  
676 growth: insight into rare plants in tropical China. *Biodivers Conserv.* 2019;**28**(2):523–37.  
677 doi: 10.1007/s10531-018-1661-4.
- 678 6. Wang W, Feng CT, Liu FZ, et al. Biodiversity conservation in China: A review of recent  
679 studies and practices. *Environ Sci Ecotech.* 2020;**2**:100025. doi: 10.1016/j.ese.2020.100025.
- 680 7. Zhang YZ, Qian LS, Spalink D, et al. Spatial phylogenetics of two topographic extremes  
681 of the Hengduan Mountains in southwestern China and its implications for biodiversity  
682 conservation. *Plant Divers.* 2021;**43**(3):181–91. doi: 10.1016/j.pld.2020.09.001.

- 683 8. McBeath J and McBeath JH. Biodiversity conservation in China: policies and practice. *J.*  
684 *Int. Wildl. Law Policy.* 2006;**9**(4):293–317. doi: 10.1080/13880290601039238.
- 685 9. Xu JC and Wilkes A. Biodiversity impact analysis in northwest Yunnan, southwest China.  
686 *Biodivers Conserv.* 2004;**13**(5):959–83. doi: 10.1023/B:BIOC.0000014464.80847.02.
- 687 10. Wyse Jackson P and Kennedy K. The Global Strategy for Plant Conservation: a challenge  
688 and opportunity for the international community. *Trends Plant Sci.* 2009;**14**(11):578–80.  
689 doi: 10.1016/j.tplants.2009.08.011.
- 690 11. López-Pujol J, Zhang FM and Ge S. Plant biodiversity in China: richly varied, endangered,  
691 and in need of conservation. *Biodivers Conserv.* 2006;**15**(12):3983–4026. doi:  
692 10.1007/s10531-005-3015-2.
- 693 12. Ma YP, Chen G, Grumbine RE, et al. Conserving plant species with extremely small  
694 populations (PSESP) in China. *Biodivers Conserv.* 2013;**22**(3):803–9. doi:  
695 10.1007/s10531-013-0434-3.
- 696 13. Sun WB, Ma YP and Blackmore S. How a new conservation action concept has accelerated  
697 plant conservation in China. *Trends Plant Sci.* 2019;**24**(1):4–6. doi:  
698 10.1016/j.tplants.2018.10.009.
- 699 14. Sun WB, Yang J and Dao ZL. Study and Conservation of Plant Species with Extremely  
700 Small Populations (PSESP) in Yunnan Province, China. Beijing: Science Press; 2019.
- 701 15. Yang J, Cai L, Liu DT, et al. China's conservation program on Plant Species with Extremely  
702 Small Populations (PSESP): Progress and perspectives. *Biol Conserv.* 2020;**244**:108535.  
703 doi: 10.1016/j.biocon.2020.108535.
- 704 16. Sun WB. List of Yunnan Protected Plant Species with Extremely Small Populations (2021).

- 705 Kunming: Yunnan Science and Technology Press; 2021.
- 706 17. The Published Plant Genomes. Phylogenetic relationships for flowering plants with  
707 genomes sequenced and published. 2023. [https://www.plabipd.de/plant\\_genomes\\_pa.ep](https://www.plabipd.de/plant_genomes_pa.ep)
- 708 18. Marks RA, Hotaling S, Frandsen PB, et al. Representation and participation across 20 years  
709 of plant genome sequencing. *Nat Plants*. 2021;**7**(12):1571–8. doi: 10.1038/s41477-021-  
710 01031-8.
- 711 19. Zanini SF, Bayer PE, Wells R, et al. Pangenomics in crop improvement—from coding  
712 structural variations to finding regulatory variants with pangenome graphs. *Plant Genome*.  
713 2022;**15**(1):e20177. doi: 10.1002/tpg2.20177.
- 714 20. Chen Y, Ma T, Zhang LS, et al. Genomic analyses of a “living fossil”: The endangered  
715 dove-tree. *Mol Ecol Resour*. 2020;**20**(3):756–69. doi: 10.1111/1755-0998.13138.
- 716 21. Ding XP, Mei WL, Huang SZ, et al. Genome survey sequencing for the characterization of  
717 genetic background of *Dracaena cambodiana* and its defense response during dragon’s  
718 blood formation. *PLoS One*. 2018;**13**(12):e0209258. doi: 10.1371/journal.pone.0209258.
- 719 22. Liu HL, Wang XB, Wang GB, et al. The nearly complete genome of *Ginkgo biloba*  
720 illuminates gymnosperm evolution. *Nat Plants*. 2021;**7**(6):748–56. doi: 10.1038/s41477-  
721 021-00933-x.
- 722 23. Ma H, Liu YB, Liu DT, et al. Chromosome-level genome assembly and population genetic  
723 analysis of a critically endangered rhododendron provide insights into its conservation.  
724 *Plant J*. 2021;**107**(5):1533–45. doi: 10.1111/tpj.15399.
- 725 24. Rodríguez del Río Á, Minoche AE, Zwickl NF, et al. Genomes of the wild beets *Beta patula*  
726 and *Beta vulgaris* ssp. *maritima*. *Plant J*. 2019;**99**(6):1242–53. doi: 10.1111/tpj.14413.

- 727 25. Sun YX, Deng T, Zhang AD, et al. Genome sequencing of the endangered *Kingdonia*  
728 *uniflora* (Circaeasteraceae, Ranunculales) reveals potential mechanisms of evolutionary  
729 specialization. *iScience*. 2020;**23**(5):101124. doi: 10.1016/j.isci.2020.101124.
- 730 26. Yang YZ, Ma T, Wang ZF, et al. Genomic effects of population collapse in a critically  
731 endangered ironwood tree *Ostrya rehderiana*. *Nat Commun*. 2018;**9**(1):5449. doi:  
732 10.1038/s41467-018-07913-4.
- 733 27. Yang J, Wariss HM, Tao LD, et al. *De novo* genome assembly of the endangered *Acer*  
734 *yangbiense*, a plant species with extremely small populations endemic to Yunnan Province,  
735 China. *GigaScience*. 2019;**8**(7):giz085. doi: 10.1093/gigascience/giz085.
- 736 28. Xu B, Liao M, Deng HN, et al. Chromosome-level *de novo* genome assembly and whole-  
737 genome resequencing of the threatened species *Acanthochlamys bracteata* (Velloziaceae)  
738 provide insights into alpine plant divergence in a biodiversity hotspot. *Mol Ecol Resour*.  
739 2022;**22**(4):1582–95. doi: 10.1111/1755-0998.13562.
- 740 29. Zhu SS, Chen J, Zhao J, et al. Genomic insights on the contribution of balancing selection  
741 and local adaptation to the long-term survival of a widespread living fossil tree,  
742 *Cercidiphyllum japonicum*. *New Phytol*. 2020;**228**(5):1674–89. doi: 10.1111/nph.16798.
- 743 30. Yang T, Zhang R, Tian X et. al. The chromosome-level genome assembly and genes  
744 involved in biosynthesis of nervonic acid of *Malaria oleifera*. *Sci. Data*. 2023;**10**(1):298.  
745 doi.org/10.1038/s41597-023-02218-8.
- 746 31. Dong SS, Wang YL, Xia NH, et al. Plastid and nuclear phylogenomic incongruences and  
747 biogeographic implications of *Magnolia* s.l. (Magnoliaceae). *J Syst Evol*. 2022;**60**(1):1–15.  
748 doi: 10.1111/jse.12727.

- 749 32. Wang YB, Liu BB, Nie ZL, et al. Major clades and a revised classification of *Magnolia* and  
750 Magnoliaceae based on whole plastid genome sequences via genome skimming. *J Syst Evol.*  
751 2020;**58**(5):673–95. doi: 10.1111/jse.12588.
- 752 33. Azuma H, García-Franco JG, Rico-Gray V, et al. Molecular phylogeny of the Magnoliaceae:  
753 the biogeography of tropical and temperate disjunctions. *Am J Bot.* 2001;**88**(12):2275–85.  
754 doi: 10.2307/3558389.
- 755 34. Figlar RB and Nootboom HP. Notes on Magnoliaceae IV. *Blumea-Biodiversity, Evolution*  
756 *and Biogeography of Plants.* 2004;**49**(1):87–100. doi: 10.3767/000651904X486214.
- 757 35. Rivers M, Beech E, Murphy L, et al. The red list of Magnoliaceae-revised and extended.  
758 Richmond: Botanic Gardens Conservation International; 2016.
- 759 36. Xia NH, Liu YH, Nootboom HP. Magnoliaceae. In: Wu ZY, Raven PH , editors. *Flora of*  
760 *China*, Vol. 7. Beijing: Science Press & St. Louis: Missouri Botanical Garden Press; 2008.  
761 p. 48–91.
- 762 37. Qin HN, Yang Y, Dong SY, et al. Threatened species list of China’s higher plants. *Biodiv*  
763 *Sci.* 2017;**25**(7):696–744. doi: 10.17520/biods.2017144.
- 764 38. Chen JH, Hao ZD, Guang XM, et al. *Liriodendron* genome sheds light on angiosperm  
765 phylogeny and species–pair differentiation. *Nat Plants.* 2019;**5**:18–25. doi:  
766 10.1038/s41477-018-0323-6.
- 767 39. Dong SS, Liu M, Liu Y, et al. The genome of *Magnolia biondii* Pamp. provides insights  
768 into the evolution of Magnoliales and biosynthesis of terpenoids. *Hortic Res.* 2021;**8**:38.  
769 doi: 10.1038/s41438-021-00471-9.
- 770 40. Yin YP, Peng F, Zhou LJ, et al. The chromosome-scale genome of *Magnolia officinalis*

- 771 provides insight into the evolutionary position of magnoliids. *iScience*. 2021;**24**(9):102997.  
772 doi: 10.1016/j.isci.2021.102997.
- 773 41. Zhou L, Hou F, Wang L, et al. The genome of *Magnolia hypoleuca* provides a new insight  
774 into cold tolerance and the evolutionary position of magnoliids. *Front. Plant Sci.*  
775 2023;**14**:1108701. doi: 10.3389/fpls.2023.1108701.
- 776 42. Yuh-wu L. A new genus of Magnoliaceae from China. *J Syst Evol*. 1979;**17**:72–4.
- 777 43. Sun WB, Zhou Y, Li XY, et al. Population reinforcing program for *Magnolia sinica*, a  
778 critically endangered endemic tree in southeast Yunnan province, China. In: Maschinski J  
779 and Haskins KE, editors. *Plant Reintroduction in a Changing Climate*. Washington: Island  
780 Press; 2012. p. 65–69.
- 781 44. Wang S and Xie Y. *China Species Red List (Vol 1)*. Beijing: Higher Education Press; 2004.
- 782 45. Cicuzza D, Newton A and Oldfield S. *The red list of Magnoliaceae*. Cambridge: Lavenham  
783 Press; 2007.
- 784 46. Anon. List of National Key Protected Wild Plants (First Group). *The Order of National*  
785 *Forestry Bureau and Agriculture Ministry of China 4*, 2–13.
- 786 47. National Forestry and Grassland Administration and Ministry of Agriculture and Rural  
787 Affairs of PRC. List of National Key Protected Wild Plants. 2021.  
788 <https://www.forestry.gov.cn/main/3457/20210915/143259505655181.html>
- 789 48. Chen Y, Chen G, Yang J, et al. Reproductive biology of *Magnolia sinica* (Magnoliaceae),  
790 a threatened species with extremely small populations in Yunnan, China. *Plant Divers.*  
791 2016;**38**(5):253–8. doi: 10.1016/j.pld.2016.09.003.
- 792 49. Chen Y. Conservation biology of *Manglietiastrum sinicum* Law (Magnoliaceae), a plant

- 793 species with extremely small populations. PhD Thesis. University of Chinese Academy of  
794 Sciences; 2017.
- 795 50. Lin L, Cai L, Fan L, et al. Seed dormancy, germination and storage behavior of *Magnolia*  
796 *sinica*, a plant species with extremely small populations of Magnoliaceae. *Plant Divers.*  
797 2022;**44**(1):94–100. doi: 10.1016/j.pld.2021.06.009.
- 798 51. Song EJ, Park S, Sun WB, et al. Complete chloroplast genome sequence of *Magnolia sinica*  
799 (Y.W.Law) Noot. (magnoliaceae), A critically endangered species with extremely small  
800 populations in Magnoliaceae. *Mitochondrial DNA B.* 2019;**4**(1):242–3. doi:  
801 10.1080/23802359.2018.1546141.
- 802 52. Su DF, Shen QQ, Yang JY, et al. Comparison of the bulk and rhizosphere soil prokaryotic  
803 communities between wild and reintroduced *Manglietiastrum sinicum* plants, a threatened  
804 species with extremely small populations. *Curr Microbiol.* 2021;**78**(11):3877–90. doi:  
805 10.1007/s00284-021-02653-z.
- 806 53. Wang B, Ma YP, Chen G, et al. Rescuing *Magnolia sinica* (Magnoliaceae), a Critically  
807 Endangered species endemic to Yunnan, China. *Oryx.* 2016;**50**(3):446–9. doi:  
808 10.1017/S0030605315000435.
- 809 54. Doyle JJ and Doyle JL. A rapid DNA isolation procedure for small quantities of fresh leaf  
810 tissue. *Phytochem. bull.* 1987;**19**(1):11–5.
- 811 55. Gonzalez-Garay ML. Introduction to isoform sequencing using pacific biosciences  
812 technology (Iso-Seq). In: Wu JQ, editor. Transcriptomics and Gene Regulation. Dordrecht:  
813 Springer Netherlands; 2016. p. 141–60.
- 814 56. Nextomics. NextDenovo: Fast and accurate de novo assembler for long reads. GitHub. 2020.

- 815 <https://github.com/Nextomics/NextDenovo>
- 816 57. Liu H, Wu S, Li A, Ruan J. SMARTdenovo: a de novo assembler using long noisy reads.  
817 GigaByte. 2021 Mar 8;2021:gigabyte15. doi: 10.46471/gigabyte.15.
- 818 58. Ruan J, Li H. Fast and accurate long-read assembly with wtdbg2. *Nat methods*, 2020;**17**(2):155–  
819 158. doi.org/10.1038/s41592-019-0669-3.
- 820 59. Walker BJ, Abeel T, Shea T, et al. Pilon: an integrated tool for comprehensive microbial variant  
821 detection and genome assembly improvement. *PLoS One*. 2014;**9**(11):e112963. doi:  
822 10.1371/journal.pone.0112963.
- 823 60. Chakraborty M, Baldwin-Brown JG, Long AD, et al. Contiguous and accurate *de novo*  
824 assembly of metazoan genomes with modest long read coverage. *Nucleic Acids Res*.  
825 2016;**44**(19):e147–e. doi: 10.1093/nar/gkw654.
- 826 61. Jin JJ, Yu WB, Yang JB, et al. GetOrganelle: a fast and versatile toolkit for accurate de novo  
827 assembly of organelle genomes. *Genome Biol*. 2020;**21**(1):241. doi: 10.1186/s13059-020-  
828 02154-5.
- 829 62. Wick RR, Schultz MB, Zobel J, et al. Bandage: interactive visualization of de novo genome  
830 assemblies. *Bioinformatics*. 2015; **31** (20): 3350–3352. doi:  
831 org/10.1093/bioinformatics/btv383.
- 832 63. Dudchenko O, Batra SS, Omer AD, et al. De novo assembly of the *Aedes aegypti* genome  
833 using Hi-C yields chromosome-length scaffolds. *Science*. 2017;**356**(6333):92–5. doi:  
834 10.1126/science.aal3327.
- 835 64. Durand NC, Shamim MS, Machol I, et al. Juicer provides a One-Click system for analyzing  
836 loop-resolution Hi-C experiments. *Cell Syst*. 2016;**3**(1):95–8. doi:



837 10.1016/j.cels.2016.07.002.

838 65. Durand NC, Robinson JT, Shamim MS, et al. Juicebox provides a visualization system for  
839 Hi-C contact maps with unlimited zoom. *Cell Syst.* 2016;**3**(1):99–101. doi:  
840 10.1016/j.cels.2015.07.012.

841 66. Hu J, Fan JP, Sun ZY, et al. NextPolish: a fast and efficient genome polishing tool for long-  
842 read assembly. *Bioinformatics.* 2019;**36**(7):2253–5. doi: 10.1093/bioinformatics/btz891.

843 67. Xu GC, Xu TJ, Zhu R, et al. LR\_Gapcloser: a tiling path-based gap closer that uses long  
844 reads to complete genome assembly. *GigaScience.* 2018;**8**(1):giy157. doi:  
845 10.1093/gigascience/giy157.

846 68. Prysycz LP and Gabaldón T. Redundans: an assembly pipeline for highly heterozygous  
847 genomes. *Nucleic Acids Res.* 2016;**44**(12):e113. doi: 10.1093/nar/gkw294.

848 69. NT database. NCBI. 2020. <https://ftp.ncbi.nlm.nih.gov/blast/db/>

849 70. Simão FA, Waterhouse RM, Ioannidis P, et al. BUSCO: assessing genome assembly and  
850 annotation completeness with single-copy orthologs. *Bioinformatics.* 2015;**31**(19):3210–2.  
851 doi: 10.1093/bioinformatics/btv351.

852 71. Li H. Aligning sequence reads, clone sequences and assembly contigs with BWA-MEM.  
853 *ArXiv.* 2013:1303.3997. doi: 10.48550/arXiv.1303.3997.

854 72. Ou SJ and Jiang N. LTR\_retriever: a highly accurate and sensitive program for  
855 identification of long terminal repeat retrotransposons. *Plant Physiol.* 2018;**176**(2):1410–  
856 22. doi: 10.1104/pp.17.01310.73.

857 73. Danecek P, Bonfield JK, Liddle J, et al. Twelve years of SAMtools and BCFtools. *Gigascience.*  
858 2021,10(2):giab008. doi: 10.1093/gigascience/giab008.

- 859 74. Li Y. IsoSeq3 - Scalable De Novo Isoform Discovery from Single-Molecule PacBio Reads.  
860 GitHub. 2018. <https://github.com/ylipacbio/IsoSeq3>
- 861 75. Haas BJ, Delcher AL, Mount SM, et al. Improving the *Arabidopsis* genome annotation  
862 using maximal transcript alignment assemblies. *Nucleic Acids Res.* 2003;**31**(19):5654–66.  
863 doi: 10.1093/nar/gkg770.
- 864 76. Stanke M, Diekhans M, Baertsch R, et al. Using native and syntenically mapped cDNA  
865 alignments to improve *de novo* gene finding. *Bioinformatics.* 2008;**24**(5):637–44. doi:  
866 10.1093/bioinformatics/btn013.
- 867 77. Chaw SM, Liu YC, Wu YW, et al. Stout camphor tree genome fills gaps in understanding  
868 of flowering plant genome evolution. *Nat Plants.* 2019;**5**(1):63–73. doi: 10.1038/s41477-  
869 018-0337-0.
- 870 78. Soltis DE and Soltis PS. Nuclear genomes of two magnoliids. *Nat Plants.* 2019;**5**(1):6–7.  
871 doi: 10.1038/s41477-018-0344-1.
- 872 79. Hu LS, Xu ZP, Wang MJ, et al. The chromosome-scale reference genome of black pepper  
873 provides insight into piperine biosynthesis. *Nat Commun.* 2019;**10**(1):4702. doi:  
874 10.1038/s41467-019-12607-6.
- 875 80. Albert VA, Barbazuk WB, dePamphilis CW, et al. The *Amborella* genome and the evolution  
876 of flowering plants. *Science.* 2013;**342**(6165):1241089. doi: 10.1126/science.1241089.
- 877 81. The Arabidopsis Genome Initiative. Analysis of the genome sequence of the flowering  
878 plant *Arabidopsis thaliana*. *Nature.* 2000;**408**(6814):796–815. doi:10.1038/35048692.
- 879 82. Cantarel BL, Korf I, Robb SM, et al. MAKER: an easy-to-use annotation pipeline designed  
880 for emerging model organism genomes. *Genome Res.* 2008;**18**(1):188–96. doi:

881 10.1101/gr.6743907.

882 83. Slater GSC and Birney E. Automated generation of heuristics for biological sequence  
883 comparison. *Bmc Bioinformatics*. 2005;**6**(1):31. doi: 10.1186/1471-2105-6-31.

884 84. Seemann T. Barrnap: Bacterial ribosomal RNA predictor. GitHub. 2018.  
885 <https://github.com/tseemann/barrnap>

886 85. Lowe TM and Eddy SR. tRNAscan-SE: a program for improved detection of transfer RNA  
887 genes in genomic sequence. *Nucleic Acids Res*. 1997;**25**(5):955–64. doi:  
888 10.1093/nar/25.5.955.

889 86. Huerta-Cepas J, Forslund K, Coelho LP, et al. Fast genome-wide functional annotation  
890 through orthology assignment by eggNOG-Mapper. *Mol Biol Evol*. 2017;**34**(8):2115–22.  
891 doi: 10.1093/molbev/msx148.

892 87. Buchfink B, Xie C and Huson DH. Fast and sensitive protein alignment using DIAMOND.  
893 *Nat Methods*. 2015;**12**(1):59–60. doi:10.1038/nmeth.3176.

894 88. Jones P, Binns D, Chang H-Y, et al. InterProScan5: genome-scale protein function  
895 classification. *Bioinformatics*. 2014;**30**(9):1236–40. doi: 10.1093/bioinformatics/btu031.

896 89. Emms DM and Kelly S. OrthoFinder: phylogenetic orthology inference for comparative  
897 genomics. *Genome Biol*. 2019;**20**(1):238. doi: 10.1186/s13059-019-1832-y.

898 90. Nguyen L-T, Schmidt HA, von Haeseler A, et al. IQ-TREE: a fast and effective stochastic  
899 algorithm for estimating maximum-likelihood phylogenies. *Mol Biol Evol*.  
900 2015;**32**(1):268–74. doi: 10.1093/molbev/msu300.

901 91. Yang ZH. PAML 4: phylogenetic analysis by maximum likelihood. *Mol Biol Evol*.  
902 2007;**24**(8):1586–91. doi: 10.1093/molbev/msm088.

- 903 92. Li HT, Yi TS, Gao LM, et al. Origin of angiosperms and the puzzle of the Jurassic gap. *Nat*  
904 *Plants*. 2019;**5**(5):461–70. doi: 10.1038/s41477-019-0421-0.
- 905 93. Magallón S, Gómez-Acevedo S, Sánchez-Reyes LL, et al. A metacalibrated time-tree  
906 documents the early rise of flowering plant phylogenetic diversity. *New Phytol*.  
907 2015;**207**(2):437–53. doi: 10.1111/nph.13264.
- 908 94. Hahn MW, De Bie T, Stajich JE, et al. Estimating the tempo and mode of gene family  
909 evolution from comparative genomic data. *Genome Res*. 2005;**15**(8):1153–60. doi:  
910 10.1101/gr.3567505.
- 911 95. Wang YP, Tang HB, DeBarry JD, et al. MScanX: a toolkit for detection and evolutionary  
912 analysis of gene synteny and collinearity. *Nucleic Acids Res*. 2012;**40**(7):e49. doi:  
913 10.1093/nar/gkr1293.
- 914 96. Edgar RC. MUSCLE: multiple sequence alignment with high accuracy and high throughput.  
915 *Nucleic Acids Res*. 2004;**32**(5):1792–7. doi: 10.1093/nar/gkh340.
- 916 97. Suyama M, Torrents D and Bork P. PAL2NAL: robust conversion of protein sequence  
917 alignments into the corresponding codon alignments. *Nucleic Acids Res*.  
918 2006;**34**(suppl\_2):609–12. doi: 10.1093/nar/gkl315.
- 919 98. Yang ZH and Nielsen R. Estimating synonymous and nonsynonymous substitution rates  
920 under realistic evolutionary models. *Mol Biol Evol*. 2000;**17**(1):32–43. doi:  
921 10.1093/oxfordjournals.molbev.a026236.
- 922 99. Zhang Z, Li J, Zhao XQ, et al. KaKs\_Calculator: calculating Ka and Ks through model  
923 selection and model averaging. *Genom Proteom Bioinf*. 2006;**4**(4):259–63. doi:  
924 10.1016/S1672-0229(07)60007-2.

- 925 100. Chen SF, Zhou YQ, Chen YR, et al. Fastp: an ultra-fast all-in-one FASTQ preprocessor.  
926 *Bioinformatics*. 2018;**34**(17):884–90. doi: 10.1093/bioinformatics/bty560.
- 927 101. Garrison E and Marth G. Haplotype-based variant detection from short-read sequencing.  
928 *ArXiv*. 2012:1207.3907. doi: 10.48550/arXiv.1207.3907.
- 929 102. Danecek P, Auton A, Abecasis G, et al. The variant call format and VCFtools.  
930 *Bioinformatics*. 2011;**27**(15):2156–8. doi: 10.1093/bioinformatics/btr330.
- 931 103. Korneliussen TS, Albrechtsen A and Nielsen R. ANGSD: analysis of next generation  
932 sequencing data. *Bmc Bioinformatics*. 2014;**15**(1):356. doi: 10.1186/s12859-014-0356-4.
- 933 104. Watterson GA. On the number of segregating sites in genetical models without  
934 recombination. *Theor Popul Biol*. 1975;**7**(2):256–76. doi: 10.1016/0040-5809(75)90020-9.
- 935 105. Tajima F. Statistical method for testing the neutral mutation hypothesis by DNA  
936 polymorphism. *Genetics*. 1989;**123**(3):585–95. doi: 10.1093/genetics/123.3.585.
- 937 106. Fu YX and Li WH. Statistical tests of neutrality of mutations. *Genetics*. 1993;**133**(3):693–  
938 709. doi: 10.1093/genetics/133.3.693.
- 939 107. Purcell S, Neale B, Todd-Brown K, et al. PLINK: a tool set for whole-genome association  
940 and population-based linkage analyses. *Am J Hum Genet*. 2007;**81**(3):559–75. doi:  
941 10.1086/519795.
- 942 108. Alexander DH, Novembre J and Lange K. Fast model-based estimation of ancestry in  
943 unrelated individuals. *Genome Res*. 2009;**19**(9):1655–64. doi: 10.1101/gr.094052.109.
- 944 109. Hanson-Smith V, Kolaczowski B, Thornton JW. Robustness of Ancestral Sequence  
945 Reconstruction to Phylogenetic Uncertainty. *Mol Biol Evol*. 2010;**27** (9):1988–1999. Doi:  
946 org/10.1093/molbev/msq081.

- 947 110. Cristofari R, Bertorelle G, Ancel A, et al. Full circumpolar migration ensures evolutionary  
948 unity in the Emperor penguin. *Nat Commun.* 2016;**7**:11842. doi:  
949 org/10.1038/ncomms11842.
- 950 111. Salojärvi J, Smolander OP, Nieminen K. et al. Genome sequencing and population genomic  
951 analyses provide insights into the adaptive landscape of silver birch. *Nat Genet.*  
952 2017;**49**:904–912. doi: org/10.1038/ng.3862.
- 953 112. Fukushima K, Pollock DD. Detecting macroevolutionary genotype–phenotype associations  
954 using error-corrected rates of protein convergence. *Nat Ecol Evol.* 2023;**7**: 155–170. doi:  
955 org/10.1038/s41559-022-01932-7.
- 956 113. Liu XM and Fu YX. Stairway Plot 2: demographic history inference with folded SNP  
957 frequency spectra. *Genome Biol.* 2020;**21**(1):280. doi: 10.1186/s13059-020-02196-9.
- 958 114. Li H and Durbin R. Inference of human population history from individual whole-genome  
959 sequences. *Nature.* 2011;**475**(7357):493–6. doi: 10.1038/nature10231.
- 960 115. Do C, Waples RS, Peel D, et al. NeEstimator v2: re-implementation of software for the  
961 estimation of contemporary effective population size (Ne) from genetic data. *Mol Ecol*  
962 *Resour.* 2014;**14**(1):209–14. doi: 10.1111/1755-0998.12157.
- 963 116. Sim N-L, Kumar P, Hu J, et al. SIFT web server: predicting effects of amino acid  
964 substitutions on proteins. *Nucleic Acids Res.* 2012;**40**(W1):452–7. doi: 10.1093/nar/gks539.
- 965 117. Boeckmann B, Bairoch A, Apweiler R, et al. The SWISS-PROT protein knowledgebase  
966 and its supplement TrEMBL in 2003. *Nucleic Acids Res.* 2003;**31**(1):365–70. doi:  
967 10.1093/nar/gkg095.
- 968 118. Bortoluzzi C, Bosse M, Derks MFL, et al. The type of bottleneck matters: Insights into the

- 969 deleterious variation landscape of small managed populations. *Evol Appl.* 2020;**13**(2):330–  
970 41. doi: 10.1111/eva.12872.
- 971 119. Kirin M, McQuillan R, Franklin CS, et al. Genomic Runs of Homozygosity record  
972 population history and consanguinity. *PLoS One.* 2010;**5**(11):e13996. doi:  
973 10.1371/journal.pone.0013996.
- 974 120. Ma YP, Wariss HM, Liao RL, et al. Genome-wide analysis of butterfly bush (*Buddleja*  
975 *alternifolia*) in three uplands provides insights into biogeography, demography and  
976 speciation. *New Phytol.* 2021;**232**(3):1463–76. doi: 10.1111/nph.17637.
- 977 121. Ma YP, Liu DT, Wariss HM, et al. Demographic history and identification of threats  
978 revealed by population genomic analysis provide insights into conservation for an  
979 endangered maple. *Mol Ecol.* 2022;**31**(3):767–79. doi: 10.1111/mec.16289.
- 980 122. Chen YC, Li Z, Zhao YX, et al. The *Litsea* genome and the evolution of the laurel family.  
981 *Nat Commun.* 2020;**11**(1):1675. doi: 10.1038/s41467-020-15493-5.
- 982 123. Chen SP, Sun WH, Xiong YF, et al. The *Phoebe* genome sheds light on the evolution of  
983 magnoliids. *Hortic Res.* 2020;**7**:146. doi: 10.1038/s41438-020-00368-z.
- 984 124. Guo X, Fang DM, Sahu SK, et al. *Chloranthus* genome provides insights into the early  
985 diversification of angiosperms. *Nat Commun.* 2021;**12**(1):6930. doi: 10.1038/s41467-021-  
986 26922-4.
- 987 125. Qin LY, Hu YH, Wang JP, et al. Insights into angiosperm evolution, floral development and  
988 chemical biosynthesis from the *Aristolochia fimbriata* genome. *Nat Plants.*  
989 2021;**7**(9):1239–53. doi: 10.1038/s41477-021-00990-2.
- 990 126. Reed DH and Frankham R. Correlation between fitness and genetic diversity. *Conserv Biol.*

- 991 2003;**17**(1):230–7. doi: 10.1046/j.1523-1739.2003.01236.x.
- 992 127. Lessio F, Pisa CG, Picciau L, et al. An immunomarking method to investigate the flight  
993 distance of the Japanese beetle. *Entomol Gen.* 2022;**42**(1):45–56. doi:  
994 10.1127/entomologia/2021/1117.
- 995 128. De Kort H, Prunier JG, Ducatez S, et al. Life history, climate and biogeography  
996 interactively affect worldwide genetic diversity of plant and animal populations. *Nat*  
997 *Commun.* 2021;**12**(1):516. doi: 10.1038/s41467-021-20958-2.
- 998 129. Gamba D and Muchhala N. Global patterns of population genetic differentiation in seed  
999 plants. *Mol Ecol.* 2020;**29**(18):3413–28. doi: 10.1111/mec.15575.
- 1000 130. Li R and Yue J. A phylogenetic perspective on the evolutionary processes of floristic  
1001 assemblages within a biodiversity hotspot in eastern Asia. *J Syst Evol.* 2020;**58**(4):413–22.  
1002 doi: 10.1111/jse.12539.
- 1003 131. Zhang KY. A preliminary study on the climatic characteristic and the formation factors in  
1004 southern Yunnan. *Acta Meteorol Sin.* 1963;**33**(2):218–230.
- 1005 132. Qian H and Ricklefs RE. Diversity of temperate plants in east Asia. *Nature.*  
1006 2001;**413**(6852):130–. doi: 10.1038/35093169.
- 1007 133. Yang FM, Cai L, Dao ZL, et al. Genomic data reveals population genetic and demographic  
1008 history of *Magnolia fistulosa* (Magnoliaceae), a Plant Species with Extremely Small  
1009 Populations in Yunnan Province, China. *Front Plant Sci.* 2022;**13**:811312. doi:  
1010 10.3389/fpls.2022.811312.
- 1011 134. Clark PU, Archer D, Pollard D, et al. The middle Pleistocene transition: characteristics,  
1012 mechanisms, and implications for long-term changes in atmospheric pCO<sub>2</sub>. *Quat Sci Rev.*



- 1013 2006;**25**(23):3150–84. doi: 10.1016/j.quascirev.2006.07.008.
- 1014 135. Sun YB and An ZS. Late Pliocene-Pleistocene changes in mass accumulation rates of eolian  
1015 deposits on the central Chinese Loess Plateau. *J Geophys Res-Atmos.*  
1016 2005;**110**(D23):D23101. doi: 10.1029/2005JD006064.
- 1017 136. Clark PU, Dyke AS, Shakun JD, et al. The Last Glacial Maximum. *Science.*  
1018 2009;**325**(5941):710–4. doi: 10.1126/science.1172873.
- 1019 137. Segelbacher G, Höglund J, Storch I. From connectivity to isolation: genetic consequences  
1020 of population fragmentation in capercaillie across Europe. *Mol Ecol.* 2003;**12**(7): 1773–  
1021 1780. doi: org/10.1046/j.1365-294X.2003.01873.x.
- 1022 138. Zhao X, Ma Y, Sun W, et al. High genetic diversity and low differentiation of *Michelia*  
1023 *coriacea* (Magnoliaceae), a critically endangered endemic in southeast Yunnan, China. *Int*  
1024 *J Mol Sci.* **13**(4): 4396–4411. doi: 10.3390/ijms13044396
- 1025 139. Khan A, Patel K, Shukla H, et al. Genomic evidence for inbreeding depression and purging  
1026 of deleterious genetic variation in Indian tigers. *Proc Natl Acad Sci.*  
1027 2021;**118**(49):e2023018118. doi: 10.1073/pnas.2023018118.
- 1028 140. Palsbøll PJ, Bérubé M and Allendorf FW. Identification of management units using  
1029 population genetic data. *Trends Ecol Evol.* 2007;**22**(1):11–6. doi:  
1030 10.1016/j.tree.2006.09.003.
- 1031 141. Deng YW, Liu TT, Xie YQ, et al. High genetic diversity and low differentiation in *Michelia*  
1032 *shiluensis*, an Endangered magnolia species in South China. *Forests.* 2020;**11**(4):469. doi:  
1033 10.3390/f11040469.
- 1034 142. Yu HH, Yang ZL, Sun B, et al. Genetic diversity and relationship of endangered plant

- 1035 *Magnolia officinalis* (Magnoliaceae) assessed with ISSR polymorphisms. *Biochem Syst*  
1036 *Ecol.* 2011;**39**(2):71–8. doi: 10.1016/j.bse.2010.12.003.
- 1037 143. Zhao XF, Ma YP, Sun WB, et al. High genetic diversity and low differentiation of *Michelia*  
1038 *coriacea* (Magnoliaceae), a critically endangered endemic in southeast Yunnan, China. *Int*  
1039 *J Mol Sci.* 2012;**13**(4):4396–411. doi: 10.3390/ijms13044396.
- 1040 144. Cai L, Liu D, Yang F, et al. Supporting data for "The chromosome-scale genome of *Magnolia*  
1041 *sinica* (Magnoliaceae) provides insights into the conservation of plant species with  
1042 extremely small populations (PSESP)". *GigaScience Database.* 2023.  
1043 <http://dx.doi.org/10.5524/102474>.

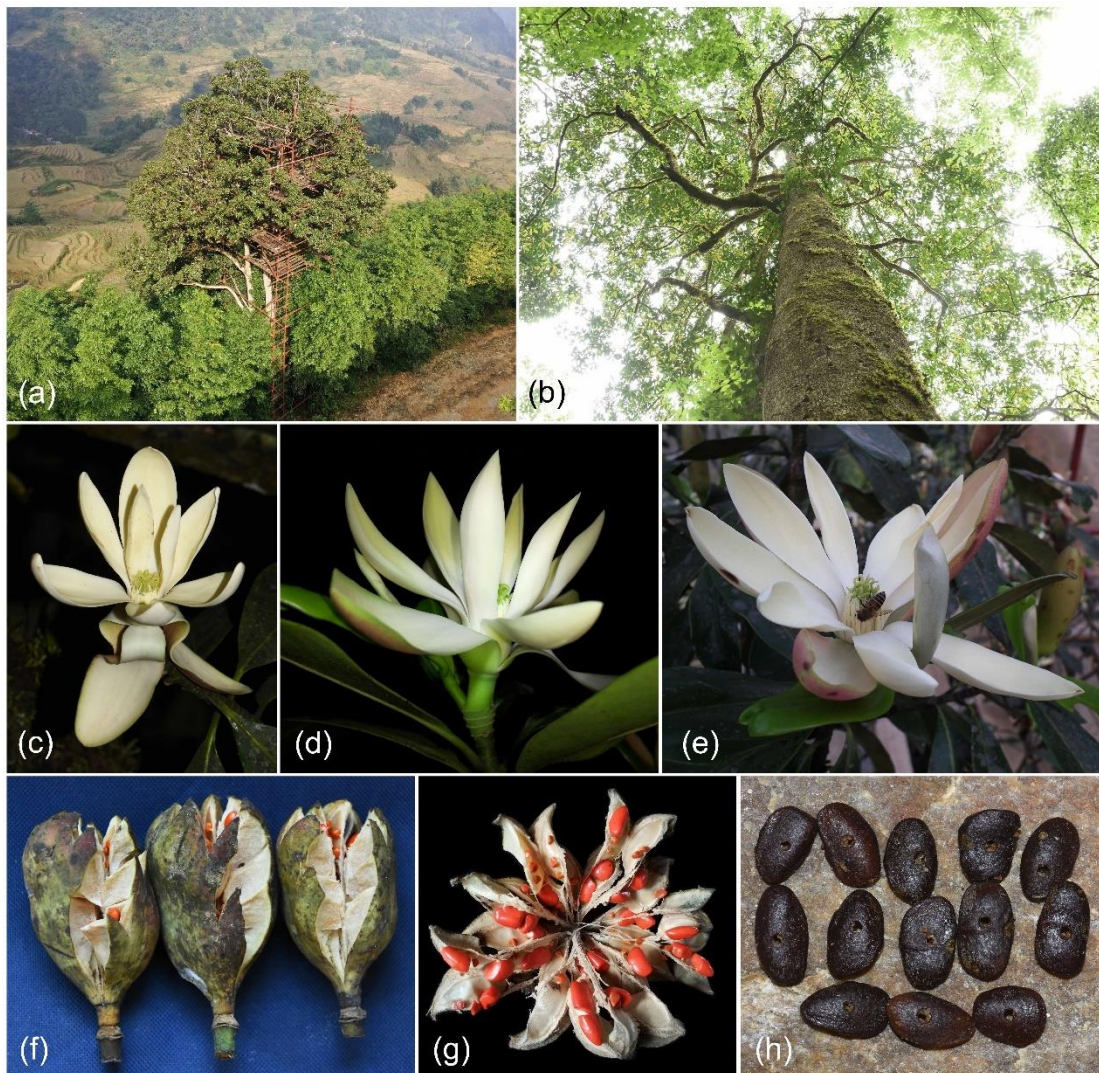

1045 **FIGURE 1** Habitat and morphological characters of *Magnolia sinica*. (a) Habitat. (b) Habit. (c-e)  
 1046 Flowers. (f) Fruits. (g) Fruit completely opened. (h) Seeds without testa.  
 1047

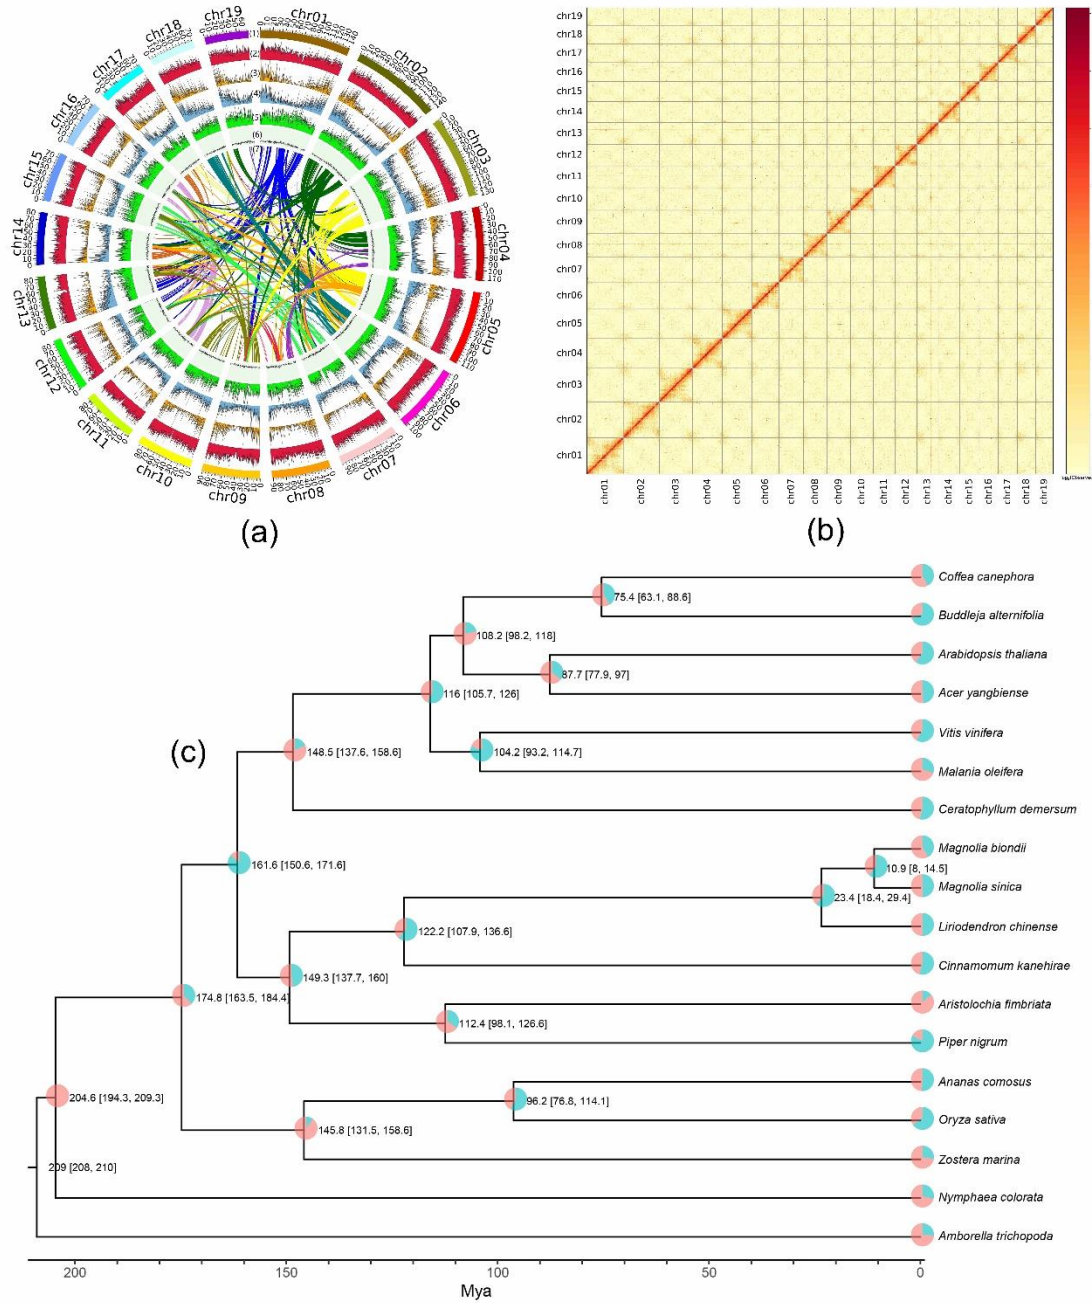

1048  
 1049 **FIGURE 2** Genomic character and genome evolution of *Magnolia sinica*. (a) The genome features  
 1050 across 19 chromosomes of *M. sinica*. (1) 19 pseudochromosomes. (2) Class I transposable element  
 1051 (TE) density (including long terminal repeats; [LTRs], long and short interspersed nuclear elements).

1052 (3) Class II TE (DNA and Heliron) density. (4) Coding gene (messenger RNA) density. (5) The  
 1053 density of single-nucleotide polymorphism (SNP) loci. (6) GC content. (7) collinear blocks. **(b)** Hi-  
 1054 C interaction heatmap for the *M. sinica* genome showing interactions among 19 chromosomes. **(c)**  
 1055 The phylogenetic tree of 18 species showing the proportions of the gene families that contracted  
 1056 and expanded (pink: contracted; blue-green: expanded; Values at the nodes represent the time of  
 1057 differentiation and 95 % CI).

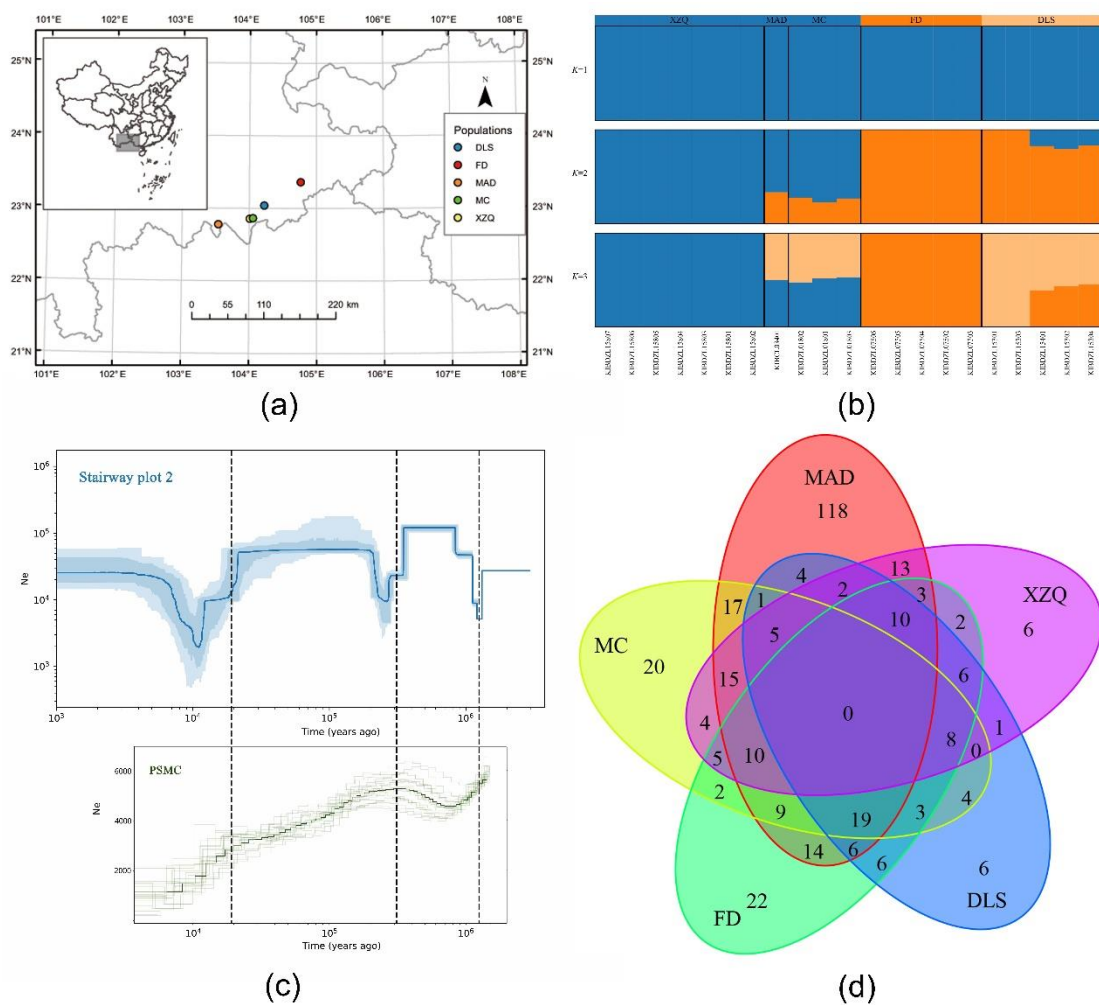

1058  
 1059 **FIGURE 3** Distribution map, population structure, demographic history and Venn diagram of  
 1060 *Magnolia sinica*. **(a)** Distribution map showing the locations of the five subpopulations in Yunnan.  
 1061 **(b)** Plots of the population structure of 21 *Magnolia sinica* individuals from five provenances for  
 1062 different numbers of subpopulations (K), from K = 1 to K = 3. **(c)** The demographic history of *M.*

1063 *sinica* inferred in Stairway plot2 (with a generation time of 30 years, and a mutation rate of  $1.2e-7$ .  
1064 The 95% confidence interval for the estimated effective population size is shown in a light blue  
1065 color) and PSMC plot (with 21 samples of *M. sinica*, with the blue line being the average effective  
1066 population size). (d) Venn diagram showing distribution of shared and unique deleterious mutations  
1067 among the five subpopulations of *M. sinica*.  
1068 MAD, Maandi population in Jinping County; FD, Fadou population in Xichou County; XZQ,  
1069 Xinzhaiqing population in Maguan County; DLS, Dalishu population in Maguan County; MC,  
1070 Miechang population in Maguan County.

1071 **Table 1 Statistics of *Magnolia sinica* genome assembly and annotation**

| Parameter                       | <i>Magnolia sinica</i> |
|---------------------------------|------------------------|
| Total assembly size (bp)        | 1,839,595,854          |
| GC content (%)                  | 40.18                  |
| Total number of contigs         | 203                    |
| Maximum contig length (bp)      | 96,921,630             |
| Minimum contig length (bp)      | 5,003                  |
| Contig N50 (bp)                 | 44,871,976             |
| Contig N90 (bp)                 | 10,133,504             |
| Total number of scaffolds       | 130                    |
| Maximum scaffold length (bp)    | 141,926,363            |
| Minimum scaffold length (bp)    | 5,003                  |
| Scaffold N50 (bp)               | 92,164,922             |
| Scaffold N90 (bp)               | 73,752,208             |
| Gap number                      | 73                     |
| Complete BUSCOs (%)             | 97.9                   |
| Complete single-copy BUSCOs (%) | 94.3                   |

|                                    |        |
|------------------------------------|--------|
| Complete and duplicated BUSCOs (%) | 3.6    |
| Fragmented BUSCOs (%)              | 0.5    |
| Missing BUSCOs (%)                 | 1.6    |
| Gene number                        | 44,713 |
| Protein-coding genes               | 43,473 |
| LAI value                          | 10.3   |

1072

**Table 1 Statistics of *Magnolia sinica* genome assembly and annotation**

| <b>Parameter</b>                   | <b><i>Magnolia sinica</i></b> |
|------------------------------------|-------------------------------|
| Total assembly size (bp)           | 1,839,595,854                 |
| GC content (%)                     | 40.18                         |
| Total number of contigs            | 203                           |
| Maximum contig length (bp)         | 96,921,630                    |
| Minimum contig length (bp)         | 5,003                         |
| Contig N50 (bp)                    | 44,871,976                    |
| Contig N90 (bp)                    | 10,133,504                    |
| Total number of scaffolds          | 130                           |
| Maximum scaffold length (bp)       | 141,926,363                   |
| Minimum scaffold length (bp)       | 5,003                         |
| Scaffold N50 (bp)                  | 92,164,922                    |
| Scaffold N90 (bp)                  | 73,752,208                    |
| Gap number                         | 73                            |
| Complete BUSCOs (%)                | 97.9                          |
| Complete single-copy BUSCOs (%)    | 94.3                          |
| Complete and duplicated BUSCOs (%) | 3.6                           |
| Fragmented BUSCOs (%)              | 0.5                           |
| Missing BUSCOs (%)                 | 1.6                           |
| Gene number                        | 44,713                        |
| Protein-coding genes               | 43,473                        |
| LAI value                          | 10.3                          |

Figure 1

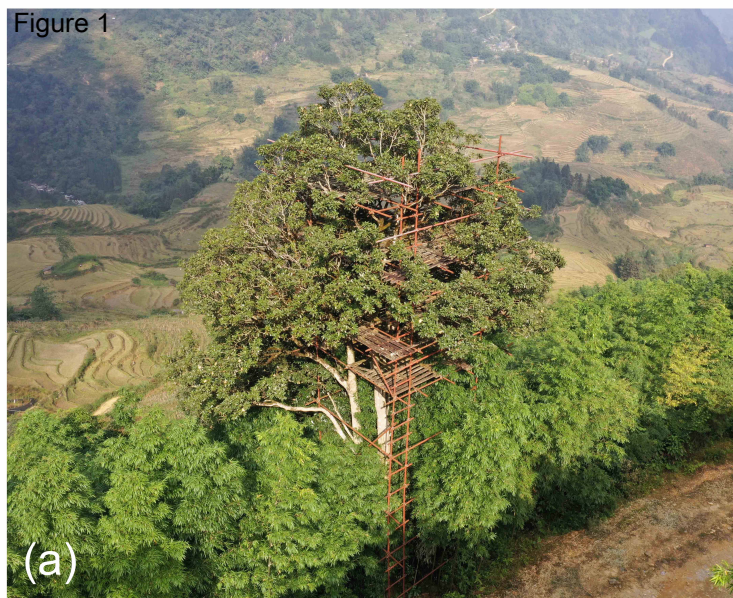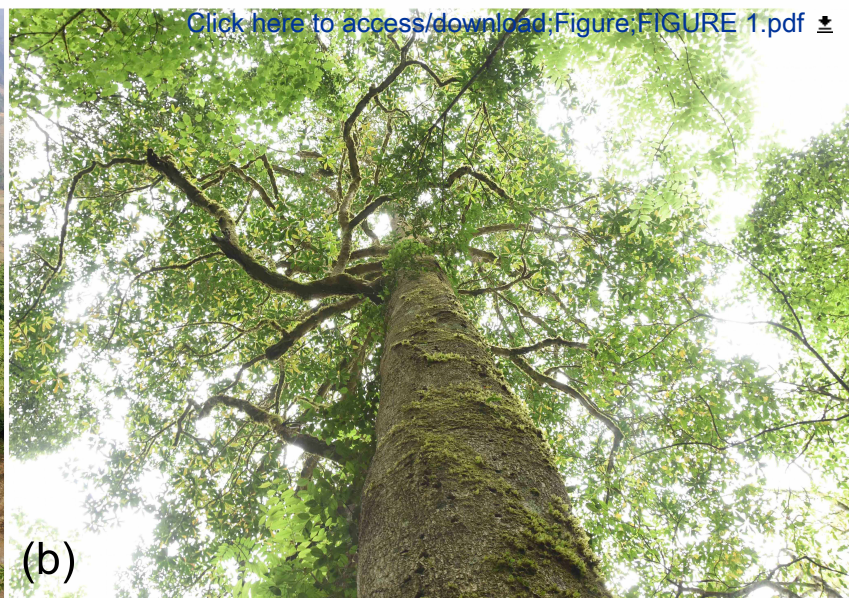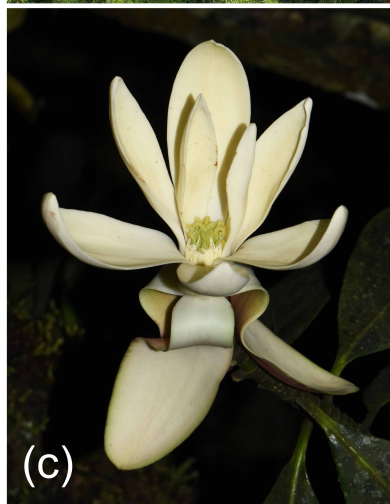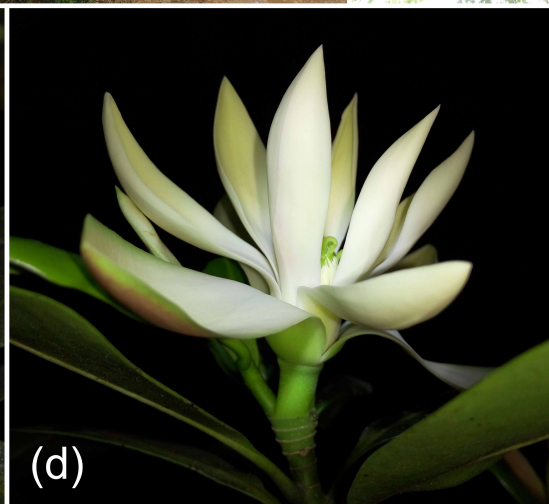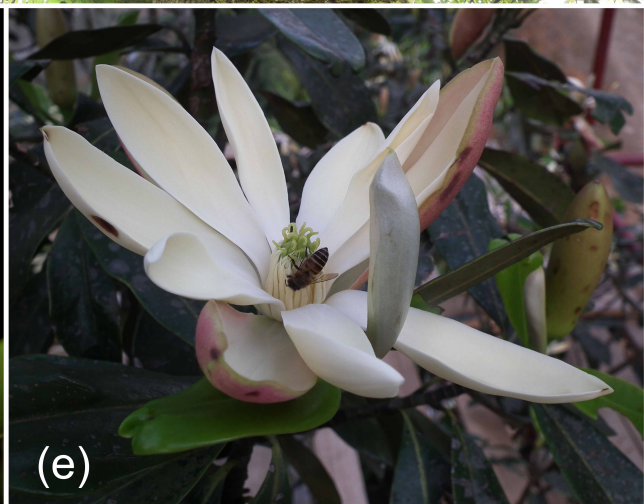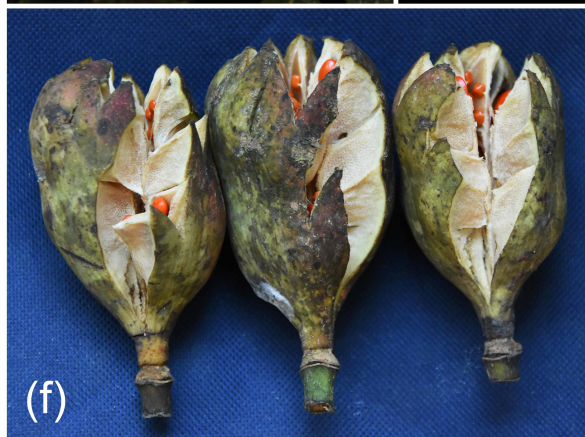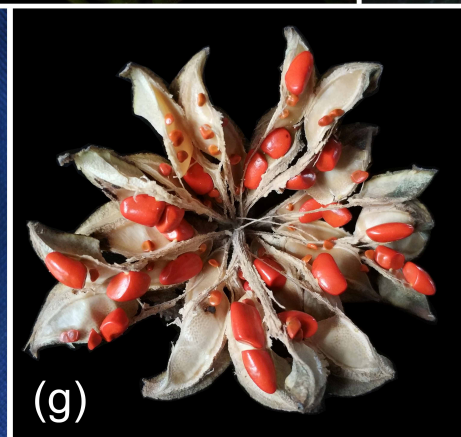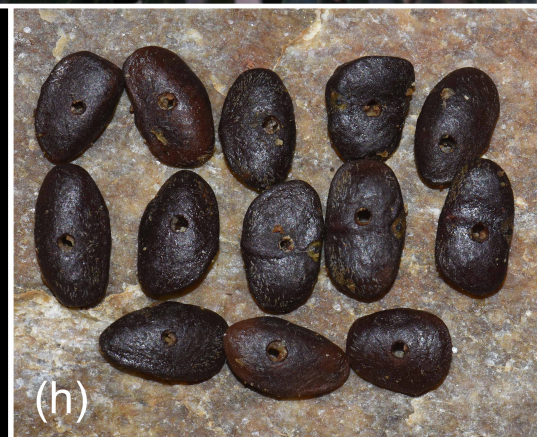



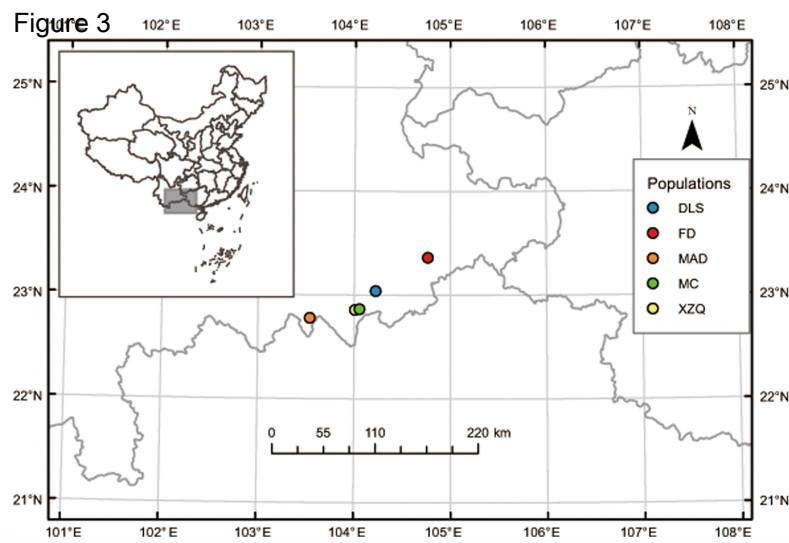

(a)

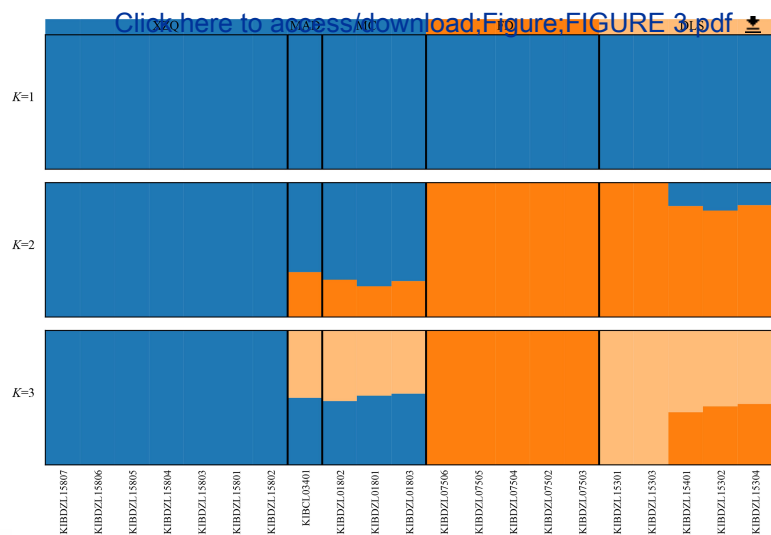

(b)

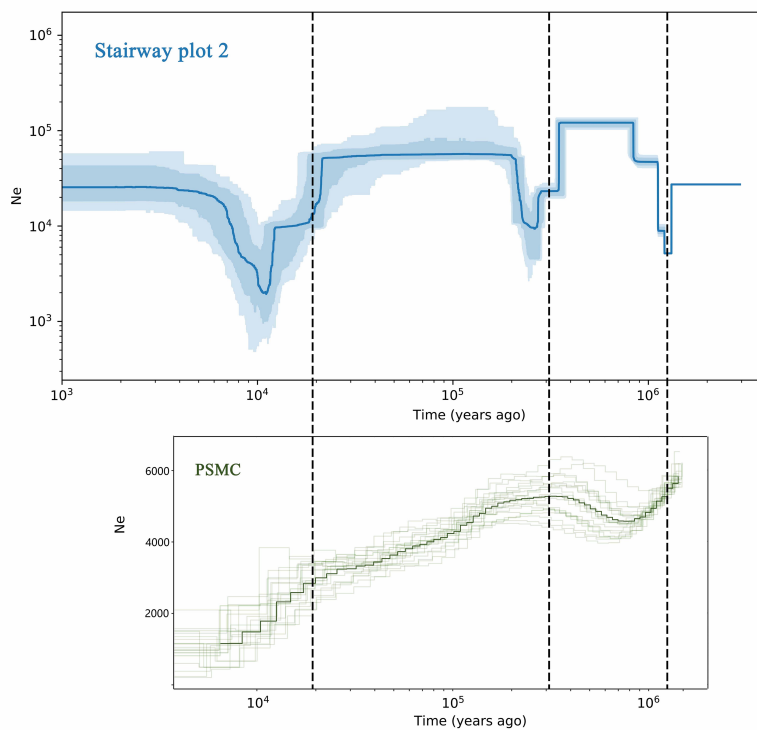

(c)

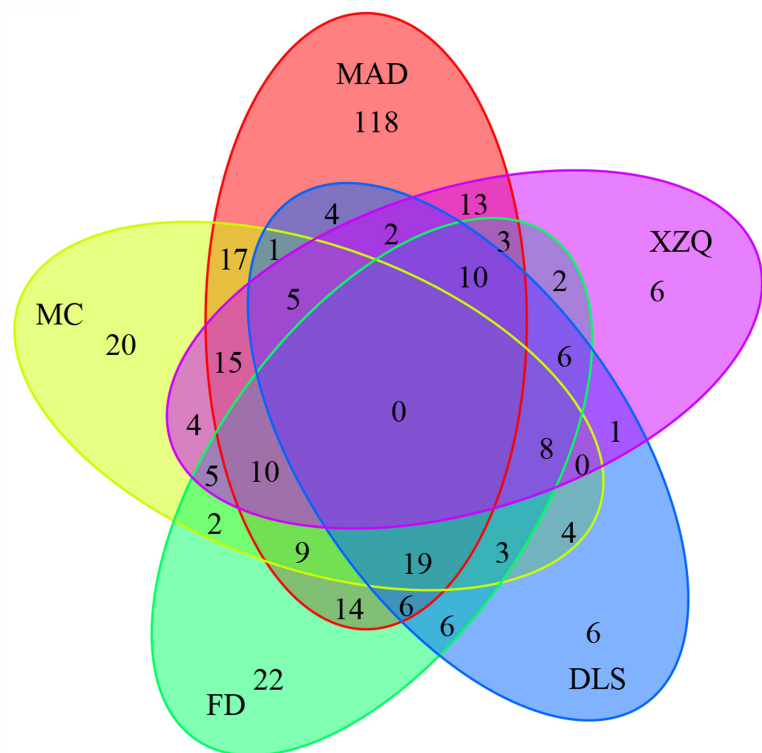

(d)

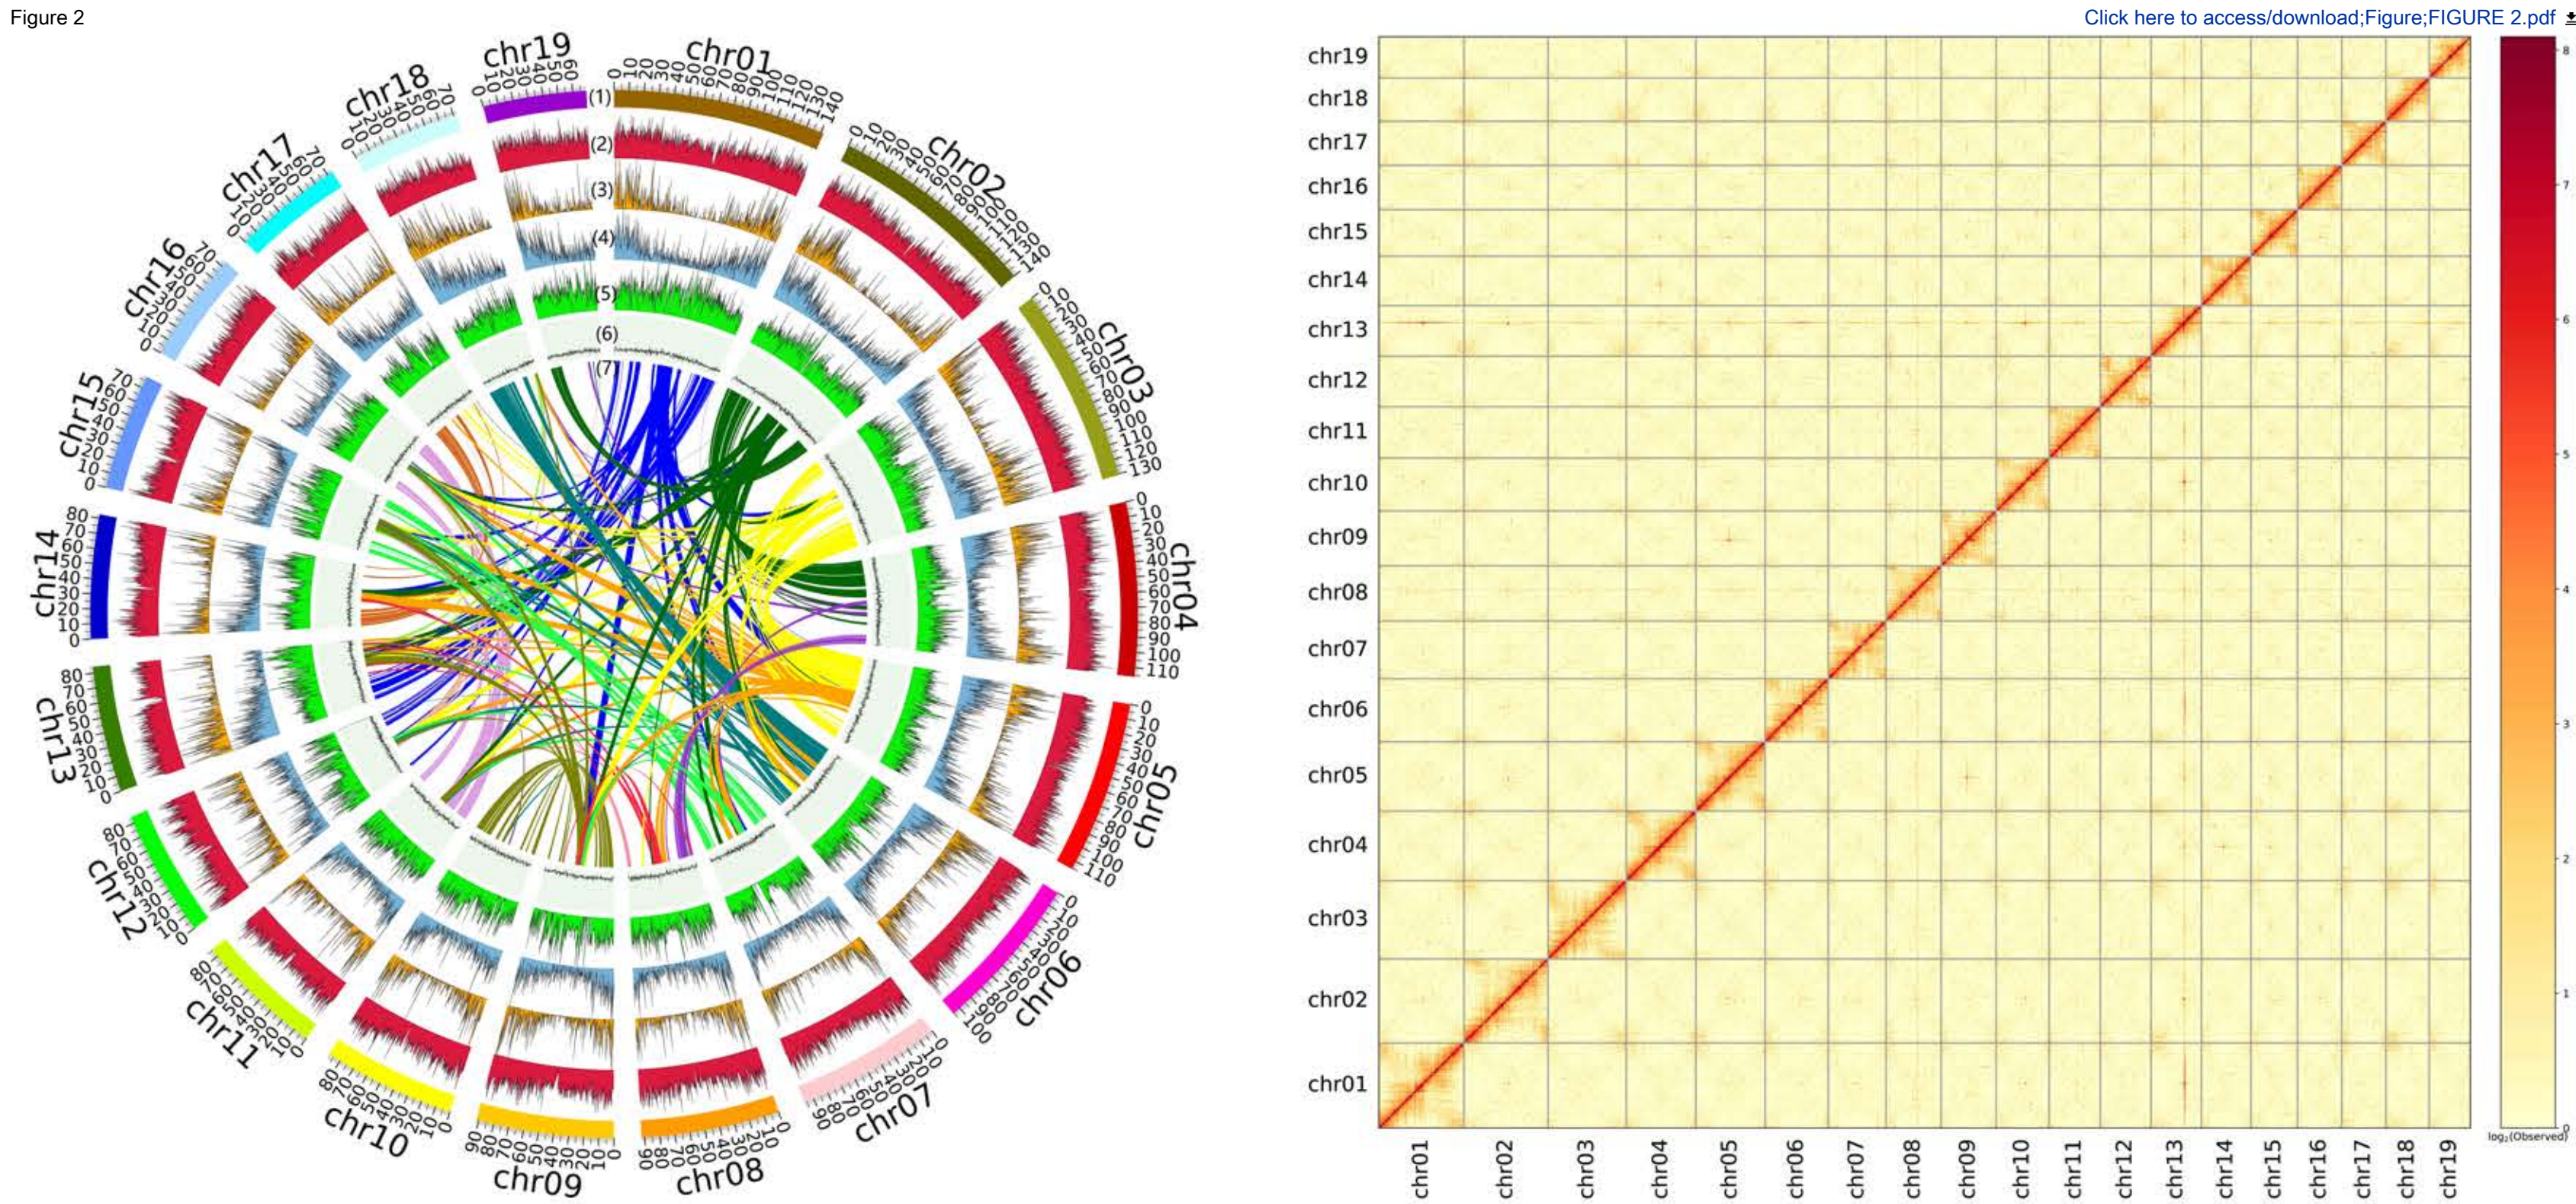

(a)

(b)

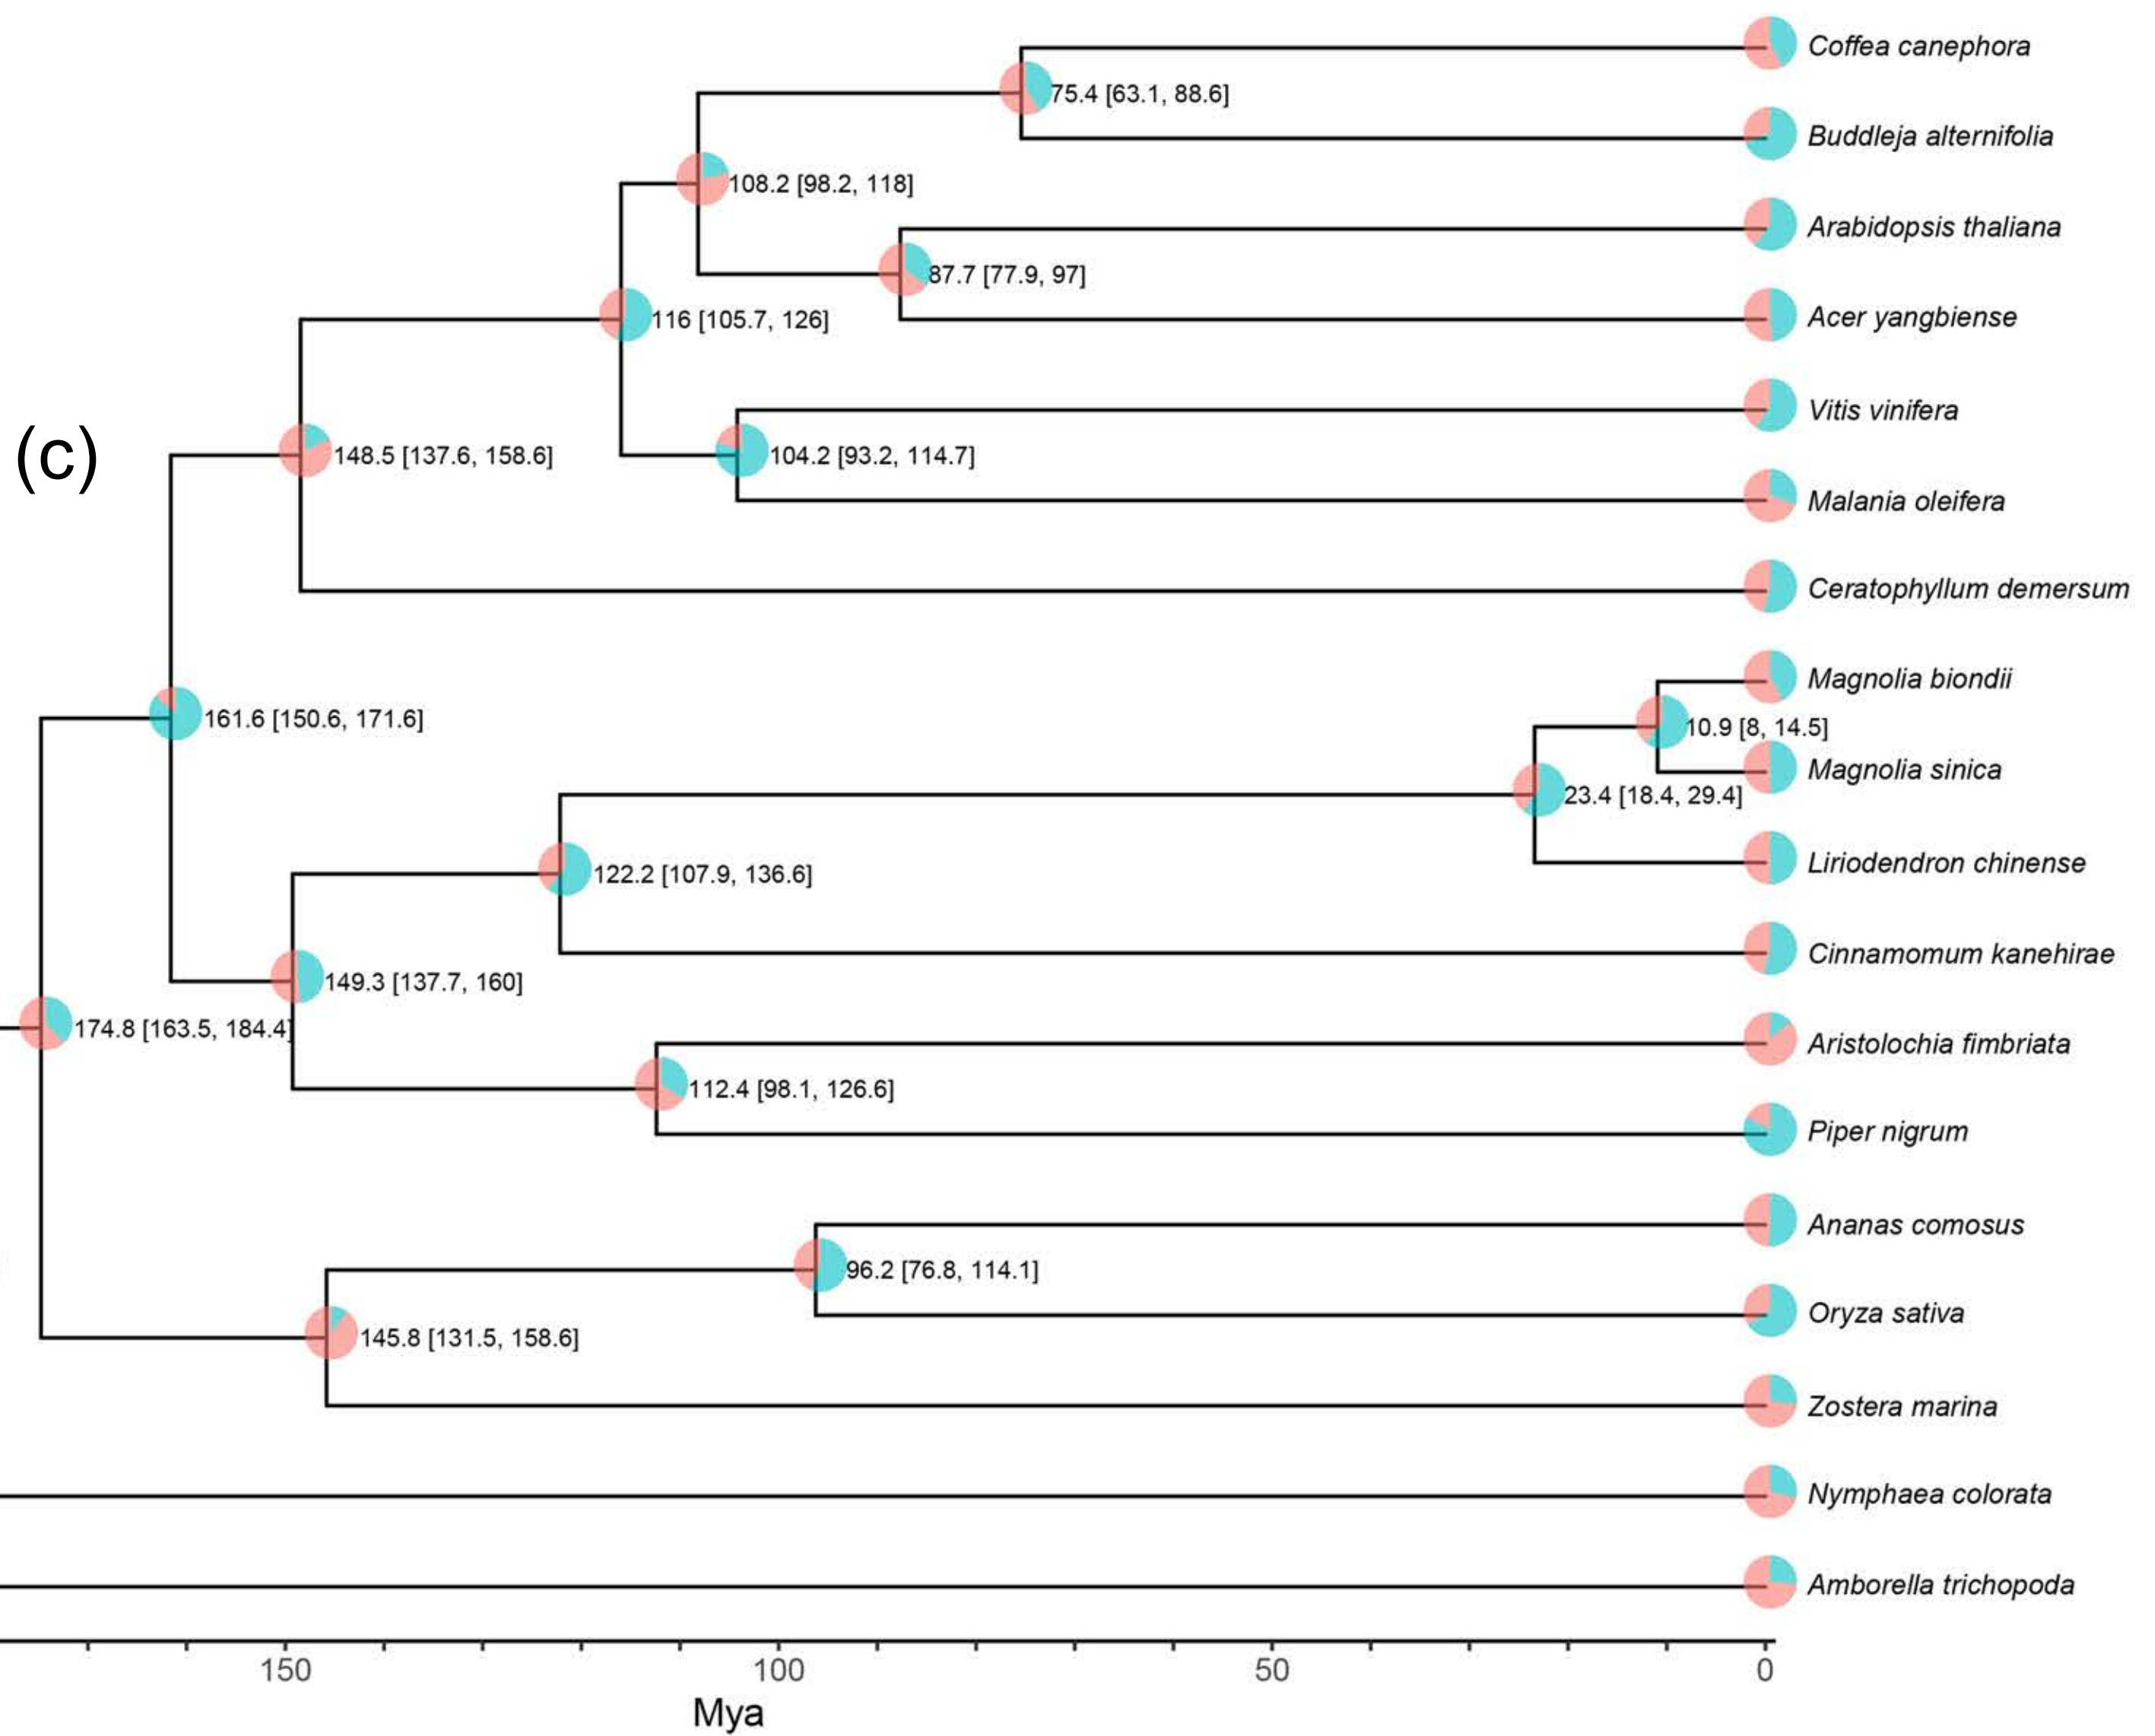

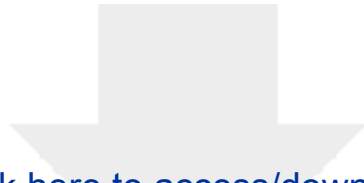

[Click here to access/download](#)

**Supplementary Material**

Supplementary file-Figures 20230728.docx

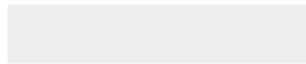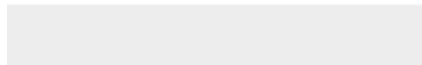



[Click here to access/download](#)

**Supplementary Material**

**Supplementary file-Tables 20230728.xlsx**

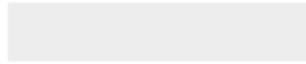

## Comments to the editor and reviewers

Dear the Editor of **GigaScience**,

Thank you very much for editing this manuscript entitled “*The chromosome-scale genome of Magnolia sinica (Magnoliaceae) provides insights into the conservation of plant species with extremely small populations (PSESP)*” and making suggestions. We are also very grateful for the efforts of the two reviewers. We have revised the manuscript carefully according to their comments and have made responses listed below.

We have accepted most of the comments from the two reviewers, made revisions to the errors that occurred, added some relevant analyses, and have responded to and explained a small portion of the questions. **1)** We have added discussions of the coexistence of high genetic diversity and low genetic differentiation to the manuscript in the DISCUSSION part. **2)** We have added relevant supplementary figures with bootstrap values in the phylogenetic tree (Figure S5). **3)** We have added parameters and we have added KAT analysis. **4)** We have released all the data produced to date (<https://www.ncbi.nlm.nih.gov/bioproject/PRJNA774088>). **5)** We have explained why the whole genome sequencing and transcriptome sequencing (RNA-seq) analyses did not use material from the same individual, and also explained why only 21 individuals were re sequenced. Please review the specific revisions and responses.

We resubmit the revised manuscript and we hope this version is now suitable for the publication in **GigaScience**. If you have any further questions or requirements, please do not hesitate to contact the corresponding author (MYP).

Yours sincerely,

Yongpeng Ma (corresponding authors on behalf of all authors).

26<sup>th</sup> JULY 2023

**Reviewer #1:** In this paper, authors reported the first genome of a critically endangered species *Magnolia sinica*. This large tree is widely known as "giant pandas in plants" due to its extremely rare individuals in wild, thus is under the first-class state protection in China. Here, authors obtained a high-quality chromosome-level genome assembly via combining Illumina, PacBio and Hi-C sequencing data. Authors mainly focus on the population resequencing, showing a high genetic diversity of *M. sinica* population but a low genetic differentiation among subpopulations. Authors provide some explanations for each result. I wonder if author can discuss the potential connections between these two observed phenomenon. In addition, authors detected many deleterious mutations which were mostly related to lipids. Authors didn't mention this result in the DISCUSSION part. Are these deleterious mutations related to lipids results of or reasons for the endangered status of this species? Authors may provide further discussions or even conclusive evidences to clearly elucidate point of view this issue.

**Response:** Thank you for your suggestion. We now added discussions of coexistence of high genetic diversity and low genetic differentiation to the manuscript in the DISCUSSION part as below:

“*M. sinica* has a pollinator-dependent outcrossing mating system, which may contribute to its high genetic diversity; while high gene flow among populations may maintain links between populations of this species, and may contribute to its low genetic differentiation. The recent reduction in population size due to anthropogenic activities has led to isolation of the populations, leading to the high genetic diversity and low genetic differentiation now observed in the fragmented populations of this endangered tree species. Similar patterns have been reported in *Michelia coriacea*, another species in the Magnoliaceae [131].”

Regarding the deleterious mutations related to lipids, we could not conclude whether they were the results of or the reasons for the endangered status of *Magnolia sinica*, and we have therefore deleted the parts of the GO and KEGG annotations and enrichment analysis regarding deleterious mutations from the manuscript.

## Reference

Zhao X, Ma Y, Sun W, et al. (2012) High genetic diversity and low differentiation of *Michelia coriacea* (Magnoliaceae), a critically endangered endemic in southeast Yunnan, China. *International Journal of Molecular Sciences*, 13(4): 4396–4411.

Minor concerns:

1. Introduction part: authors should point out what's the major limitations of the current protection of Huagaimu. And how a reference genome helps to overcome such limitations.

**Response:** Thank you. We have added the first part in the manuscript. And, the second part was included in last paragraph of the introduction as below.

“Although a great deal of protection and research action has been carried out, the lack of natural regeneration and genetic rescue still limits the protection of *M. sinica*. Therefore, the formulation of genetic rescue strategies for *M. sinica* will benefit greatly from the exploration of harmful cumulative mutations, population historical dynamics and effective population size from the whole genome level.

Here, we report a high-quality chromosome-scale genome sequence of *Magnolia sinica*, and compare it with other relevant published genomic data. By exploring the evolution of the genome, as well as the genetic characteristics, demographic history and genetic load of *M. sinica*, we have identified genomic factors that may contribute to the threats to this species, and, on the basis of this, we propose further strategies for the conservation of *M. sinica*.”

2. *Magnolia sinica* was first occurred in Line 79 in the main text and it should be written as *M. sinica* afterwards.

**Response:** Thank you. We have checked and revised this.

3. Line 206: "integrated annotated protein" should be "integrated annotated proteins".

**Response:** Thank you. We have revised this.

4. Line 222-224: References were needed here.

**Response:** Thank you. We have added relevant references.

5. Line 253: "θW" should be "θw".

**Response:** Thank you. We have revised this.

6. Fig. 2c, there shouldn't be a "\_" within species name. And, bootstrap values should be indicated in the phylogenetic tree. In addition, Fig. 2 contained different results with no obvious connections. I do recommend to layout the content of this figure, focusing on one particular theme.

**Response:** Thank you. We now deleted the "\_" within species name. We have added a relevant supplementary figure with the bootstrap values in the phylogenetic tree, please check (**Figure S5**). Because of the large number of figures in the manuscript, we have tried to save space and have given the figures (genomic character and genome evolution), where related figures are merged into one plate and explanations are provided separately.

7. No title was found in Fig. 3. Authors should give a strong title that reflects the major finding of this figure.

**Response:** Thank you. We have added a title (Distribution map, population structure, demographic history and Venn diagram of *Magnolia sinica*) for this Figure 3.

**Reviewer #2:** This manuscript described the assembly and analyses of the chromosome-scale genome assembly for *Magnolia sinica*, an endangered Magnoliaceae species. Despite the authors provided a useful piece of work, it can still be greatly improved. In particular, it needs a thorough proofing to clarify many points in the Material & Methods section, as well as in results.

However, a major interrogation is the rational of resequencing only 21 *M. sinica* and 22 other *Magnolia*, while there is only 52 remaining *M. sinica* in the wild. I think it would have shown a much complete picture to generate data for all (known) individuals **in the species.**

**Response:** Thank you for your questions. In 2019, we only re-sequenced the materials that we had collected (21 samples). These materials included samples from all populations and covered the full range of the *Magnolia sinica* distribution, representing >40% of all *M. sinica* individuals. Because the collection of these



materials took a lot of money and time, considering the cost of re-collection and the expensive re-sequencing costs at the time, we were unable to collect material from more individuals. Furthermore, based on the preliminary analysis of our sequencing data, we found that there were no significant differences (such as genetic diversity or genetic structure) compared to previous population studies based on SSR (Chen 2017, in Chinese). Therefore, we only sequenced 21 individuals of *M. sinica* from that time. The phylogenetic position of *M. sinica* has always been controversial, so we chose to sequence 22 samples from other eight *Magnolia* species. We have provided the relevant chloroplast tree (**attached figure 1 chloroplast tree**) and SNPs tree (**attached figure 2 SNP\_tree**) as attachments at the bottom of this file.

I noticed several mistakes in the description of used data and methods. For example:

(1) line 21 the authors mentioned using Pacbio data for genome assembly, but from the Material & Methods, they used only ONT data to generate long reads for assembly

**Response:** We have revised this mistake.

(2) they mentioned a QiaGen kit that seems to not exist in Material & Methods line 149 they mentioned using Pilon to modify - correct? - Illumina reads; should be the opposite

**Response:** The reagent kit with product number 13323, Qiagen, is available. Genomic DNA kit (cat. no. 13323. Qiagen, Hilden, Germany). Please check: <https://www.qiagen.com/us/products/discovery-and-translational-research/dna-rna-purification/dna-purification/genomic-dna/blood-and-cell-culture-dna-kits>.

We have corrected the description of correcting with Illumina reads.

(3) Parameters used for pipelines are missing in several part of the manuscript

Also, the usually used metrics and quality assessment methods were not used here; I would appreciate to get a Merqury / KAT/ GenomeScope analysis in addition to the BUSCO and LAI.

**Response:** We have added parameters and a KAT analysis.

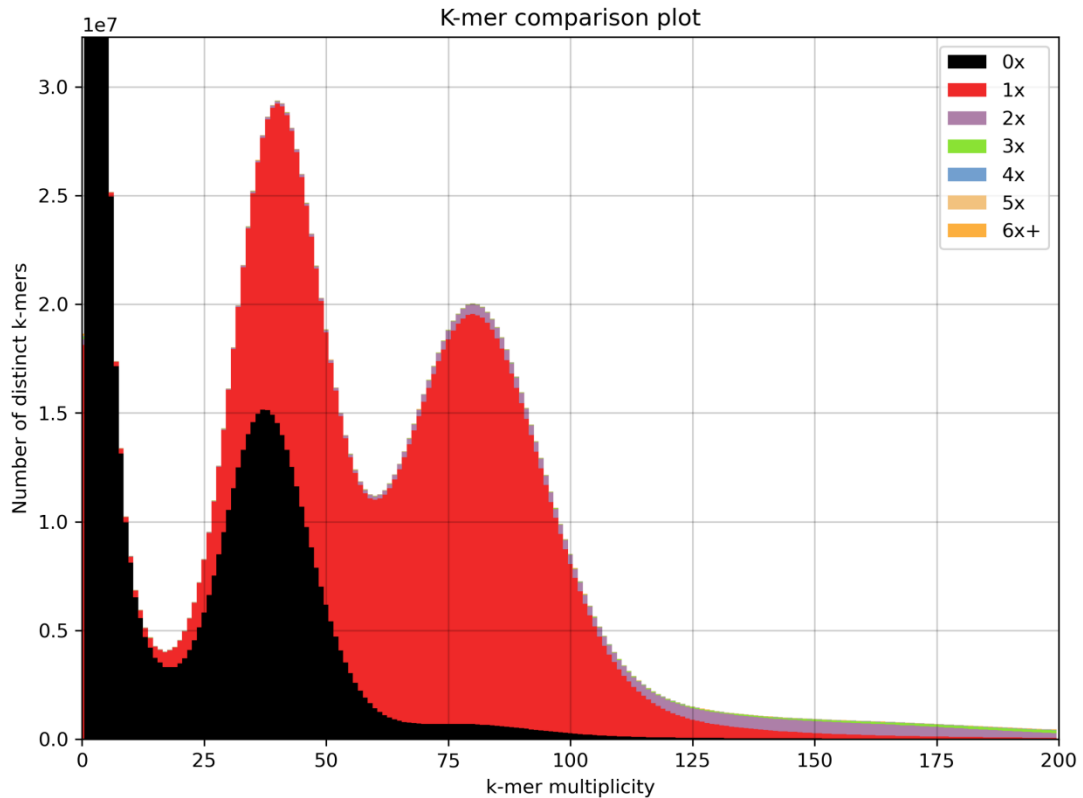

Also, I don't really understand why the authors performed RNAseq for annotation from a different individual, instead of using the same individual as for the genome assembly.

**Response:** Thank you. We understand your concern regarding this issue, unfortunately we faced some challenges during this project. In 2019, when we started sequencing, leaf samples were initially sent to a company in dry ice for genome sequencing. Later in 2020, when we collected multiple tissues for RNA-seq, it became very difficult to send samples rapidly in dry ice because of special policies (special periods of COVID-19). Therefore, for simplicity, we decided to directly send a living seedling (including leaf, stem, root tissues, but excluding other tissues such as flowers) and fresh fruits at room temperature (without dry ice) for RNA-seq. Therefore, the RNAseq and genome assembly analyses were conducted using different individuals. However, because we used the PacBio platform to sequence the full-length cDNA, the variations between individuals should have very limited negative effects on gene annotation. In fact, 99.5% PacBio CCS reads were mapped to the genome.

The ancestral sequence reconstruction part appeared quite weak with the method used, not taking into account the emergence of potentially large Structural Variations (SVs)

across the chromosomes during their evolutions. I would suggest, if the authors want to keep this part to use a more robust approach (e.g. based on Salse, 2021 approach)

**Response:** Thank you for your suggestion. We agree that the emergence of SV may influence the reconstruction of ancestral state. However, SV is difficult to detect from our short resequencing reads. Here we used an empirical Bayesian method based on posterior probability of the sites to reconstruct ancestral sequence. This method can produce accurate reconstruction of the ancestral sequence (Hanson-Smith et al. 2010) and has been previously used to reconstruct the ancestral state in other works (Cristofari et al., 2016; Salojärvi et al., 2017; Ma et al., 2021; Fukushima et al., 2023). We apologize for not being able to find the article by “Salse, 2021”. After explaining our method above, if it is necessary to use Salse's approach, could you please provide us more information about it and give us another chance to revise it?

## References

Cristofari R, Bertorelle G, Ancel A, et al. Full circumpolar migration ensures evolutionary unity in the Emperor penguin. *Nat Commun.* 2016;7:11842. doi: org/10.1038/ncomms11842.

Fukushima K, Pollock DD. Detecting macroevolutionary genotype–phenotype associations using error-corrected rates of protein convergence. *Nat Ecol Evol.* 2023;7: 155–170. doi: org/10.1038/s41559-022-01932-7.

Hanson-Smith V, Kolaczkowski B, Thornton JW. Robustness of Ancestral Sequence Reconstruction to Phylogenetic Uncertainty. *Mol Biol Evol.* 2010;27 (9):1988–1999. Doi: org/10.1093/molbev/msq081.

Ma H, Liu YB, Liu DT, et al. Chromosome-level genome assembly and population genetic analysis of a critically endangered rhododendron provide insights into its conservation. *Plant J.* 2021;107(5):1533–45. doi: 10.1111/tpj.15399.

Salojärvi J, Smolander OP, Nieminen K. et al. Genome sequencing and population genomic analyses provide insights into the adaptive landscape of silver birch. *Nat Genet.* 2017;49:904–912. doi: org/10.1038/ng.3862.

The data accessibility is also questionable, as the authors mentioned the BioProject PRJNA774088, that is already cited by a published paper, but not accessible

**Response:** We apologize that the data were not released earlier. The data have now been completely released (<https://www.ncbi.nlm.nih.gov/bioproject/PRJNA774088>). A copy of the data can be found in China National Center for Bioinformation (<https://ngdc.cncb.ac.cn/bioproject/browse/PRJCA015437>).

**Specific comments:**

- Line 21 : Only ONT data were combined with short reads to assemble the genome ;

**Response:** Sorry, we have revised this mistake.

- Line 59 : please add the date when the database have been accessed ;

**Response:** Thank you. We have corrected this and added the access dates.

- Line 93-97 : this seems more adequate for a Data Notes than for a research article ;

**Response:** Thank you, this is indeed only a partial summary. Here, we not only reported the high-quality chromosome-scale genome sequence of *Magnolia sinica* and re-sequenced 21 samples of the same species and 22 samples from other species, but also investigated genome evolution, genome-wide diversity, and population structure of this species, inferred its demographic history, and estimated its genetic load and inbreeding level. We further discussed the possible reason for its high genetic diversity but low genetic differentiation, the climatic, tectonic and anthropogenic explanation of its demographic history, the likely genetic basis of the extremely small populations, and provided conservation measures based on our findings. We think it is worthy of a research article.

- Line 107 : dry ice temperature is -78.5°C

**Response:** We have revised this mistake.

- Line 118 : this kit does not exist (the reference number is for an other kit)

**Response:** We have revised this. The Genomic DNA kit (cat. no. 13323. Qiagen, Hilden, Germany) is available, and this kit can also extract genomic DNA from diverse materials. The kit was also used to extract plant DNA after treatment of CTAB.

- Line 121 : more details are needed for the library construction method. What was the DNA input ? any modification from the ONT protocol ? barcoded library or not ?

**Response:** The DNA input was total genomic DNA. The ONT protocol was not

modified, and the library was not barcoded.

- Line 124 : please choose the machine the library was run on (or precise which library was run on which machine) ; how many flowcells ?

**Response:** PromethION was used yielding 7 flowcells. This has been added to the manuscript.

- Line 126 : what fragment size for the Illumina library

**Response:** We have added insertion size of 300–500 bp.

- Line 130 : what was considered as "high molecular weight DNA" ?

**Response:** This refers to longer and more complete DNA with high “molecular weight”.

- Line 147: please precise what assembly strategies did you used (= assemblers ?)

**Response:** Thank you, we have added a descriptions of the assembly method.

- Line 148 : this reference is for the Celera assembler only, did you use it ?

**Response:** No. We have revised the text.

- Line 149 : short reads were used to correct long reads, not the opposite ;

**Response:** Thank you, this has been revised.

- Line 151 : how they were polished ?

**Response:** The method has been added.

- Line 151 : please described the parameters used in GetOrganelles to assemble both the mitochondrial genome and plastome

**Response:** The parameters have been added.

- Line 159 : "scaffolded" instead of "scattered" ?

**Response:** This has been revised as “un-anchored” meaning contigs that were not anchored onto chromosomes.

- Line 161 : what parameters for LR\_Gapcloser and NextPolish ?

**Response:** The parameters have been added.

- Line 163 : Redundant (typo)

**Response:** It has been revised.

- Line 165 : what is the NT library ?

**Response:** The NT library is NT database from NCBI for BLAST (<https://ftp.ncbi.nlm.nih.gov/blast/db/>). We have revised this in the text for clarification.

- Line 167 : how low was a coverage considered ?

**Response:** We have revised this in the text.

- Line 172-183 : see above for addition of QC pipelines results

**Response:** We have added KAT analysis.

- Line 189 : how these two libraries were combined ?

**Response:** We concatenated the two libraries (fasta files) directly using the Linux command ``cat``.

- Line 194 : Considering Magnoliaceae position in angiosperms, I think it could be useful to add at least one monocots in the annotation process (e.g. the wheat or maize, or rice genome)

**Response:** Thank you for your suggestion. We tested this by adding the wheat genome, and found only 551 new genes (1.3% more than before) predicted by the MAKER2 pipeline. We also tested it with the *Aristolochia fimbriata* (Piperales) genome as evidence, and 1419 genes (3.3% more) were newly identified. It appears that more protein evidences would certainly produce more genes, but considering the improvements (1.3-3.3% more genes) are quite limited and would not significantly affect our downstream conclusions regarding comparative and conservation genomics, we chose to not include the update in the revision.

- Line 201 : Augustus is usually used as an ab initio annotator ; please specify more in details how you used it the integrate previous annotations

**Response:** Yes, Augustus is an ab initio annotator, but it supports biological evidence (hint file from transcript and protein alignments) as input for better prediction. This step is integrated in the MAKER2 pipeline. We have revised the text for a clearer description.

- Line 217, 220, 222 : why there is a discrepancy between the single-copy gene numbers ?

**Response:** We used different cutoffs to allow for missing data. For the ASTRAL method, more genes are better with high ILS (incomplete lineage sorting) level, and missing data are more tolerated (References below), so we used more genes with higher missing rate (30%). For the IQTREE method, missing data are moderately tolerated, so we used the dataset with moderate missing rate (12.5%; the dataset was generated in

OrthoFinder2 to infer a species tree in its pipeline). MCMCtree uses only non-missing data by default, so we just included 1:1 orthologous single-copy genes (with none missing). Different dataset may provide cross-validations to reduce sampling bias. We have added detailed descriptions.

### References:

Molloy E K, Warnow T. To Include or Not to Include: The Impact of Gene Filtering on Species Tree Estimation Methods [J]. *Syst. Biol.*, 2017, 67 (2): 285–303

[<http://doi.org/10.1093/sysbio/syx077>]

Shekhar S, Roch S, Mirarab S. Species Tree Estimation Using ASTRAL: How Many Genes Are Enough? [J]. *IEEE/ACM Transactions on Computational Biology and Bioinformatics*, 2018, 15 (5): 1738–1747

[<http://doi.org/10.1109/TCBB.2017.2757930>]

[<http://doi.org/10.1109/TCBB.2017.2757930>]

- Line 235 : Why not using the 52 *M. sinica* individuals (see above) ?

**Response:** Thank you for your questions. In 2019, we only re-sequenced the materials that we had collected (21 samples). These materials included samples from all populations, and covered the full range of the *Magnolia sinica* distribution, representing >40% of all *M. sinica* individuals. Because the collection of these materials took a lot of money and time, considering the cost of re-collection and the expensive re-sequencing costs at the time, we were unable to collect material from more individuals. Furthermore, based on the preliminary analysis of our sequencing data, we found that there were no significant differences (such as genetic diversity or genetic structure) compared to previous population studies based on SSR (Chen 2017, in Chinese). Therefore, we only sequenced 21 individuals of *M. sinica* from that time.

- Line 241 : sequences with quality score <20 should not be found in the clean reads (from line 238)

**Response:** After filtering with fastp, the proportion of sequences with a quality score <20 decreases, however, there are still some bases with a quality score <20. Fastp trims reads using a sliding window, but did not trim all bases with a quality score <20. Thus,

we excluded the potentially retained bases with quality score  $<20$  in downstream analysis (ANGSD and freebayes).

- Line 242 : considering a sequencing depth ranging from 8.8X to 12.6X for *M. sinica* (max 14.3X for other Magnolia), it seems unrealistic to remove sites with a mapping depth  $<100X$

**Response:** The depth of sites refers to the sum of all samples, but not average depth across samples. The distribution of the depth of sites is as follows. The peak value is at 331x, so empirically the upper limit is set to 600x, about twice that of the peak, and the lower limit is about 1/3 of the peak. We have revised the text to make this clear.

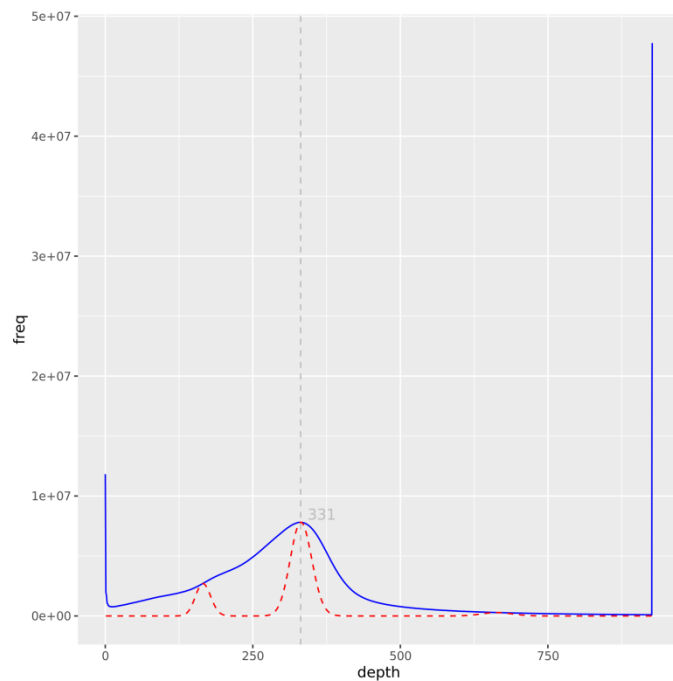

- Line 243 : please specify how these sites were retained

**Response:** We have described this in more detail in the paper.

- Line 248 : why the authors did not use the widely used 10% missing data threshold?

**Response:** Thank you for your question. We wanted to balance the threshold and the number of SNPs. Considering that there are many species, a stricter threshold would lead to fewer SNPs, which may not have been sufficient for downstream analyses. In fact, the threshold of 20% or higher has also been used in previous studies (References below).

**References:**



Liu S, Zhang L, Sang Y et. al. Demographic History and Natural Selection Shape Patterns of Deleterious Mutation Load and Barriers to Introgression across Populus Genome [J]. Mol. Biol. Evol., 2022, 39 (2) [http://doi.org/10.1093/molbev/msac008]

Dai F, Zhuo X, Luo G et. al. Genomic Resequencing Unravels the Genetic Basis of Domestication, Expansion, and Trait Improvement in Morus Atropurpurea [J]. Adv. Sci., 2023 [http://doi.org/10.1002/advs.202300039]

Wang P, Zhou G, Jian J et. al. Whole-genome assembly and resequencing reveal genomic imprint and key genes of rapid domestication in narrow-leafed lupin [J]. Plant J., 2021, 105 (5): 1192–1210 [http://doi.org/10.1111/tpj.15100]

Ma Z, Zhang Y, Wu L et. al. High-quality genome assembly and resequencing of modern cotton cultivars provide resources for crop improvement [J]. Nat. Genet., 2021 [http://doi.org/10.1038/s41588-021-00910-2]

- Line 249 : due to both the relatively low number of individuals and the large part of the sampling made of other Magnolia species, such a classic MAF value would results in removing SNPs present in 1 or 2 samples, making them potentially diagnostic of a given species

**Response:** We did not aim to make diagnostic of a given species, so the species-specific SNPs were not necessary for our analyses. In the phylogenetic tree based on the filtered SNPs (attached figure 2 SNP\_tree), each species has formed a separate monophyletic clade, suggesting that our filtering with the classic MAF value did not obscure the relationships among these species.

- Line 250 and following : Please described more in details, but concisely, how these different datasets are made, and how they are each useful (at least more useful than only one or two datasets)

**Response:** We apologized for the imprecise and incorrect descriptions. We have revised this and have also added an additional schematic diagram to the supplementary figures to illustrate it.

- Line 309 : please add the parameters used

**Response:** Thank you, we have added these.

- Line 319 : did the authors considered flow cytometry to get a (more) accurate estimate of the genome size ? Considering the patrimonial value of the species, it could be valuable.

**Response:** Thank you. At that time, the Genome size of *Magnolia sinica* was estimated by k-mer analysis of the Illumina sequencing data. This method is widely used and is sufficiently accurate, so we felt that we did not need to use an experimental method based on Flow Cytometry.

- Line 327 : Did the authors compared the LAI value obtained here with other Magnolia genome assemblies ?

**Response:** Thank you. We could not compare the relevant LAI values of several Magnolia species because of the other three genomic articles did not calculate this value.

- Line 335-336 : Please add values for gene annotations from transcriptomic, ab initio and similarity approaches separately, then indicate how many were supported, filtered and so on, with the final value.

**Response:** The MAKER annotation pipeline used in the study does not generate individual gene annotations; instead, it only produced intermediate alignments of evidence. Here we compared these intermediate alignments to the final gene set. Please refer to the attached table for details.

|                          |                          | intermediate | supporting final gene set |
|--------------------------|--------------------------|--------------|---------------------------|
| augustus_masked          | match                    | 68925        | 34751                     |
| blastn                   | expressed_sequence_match | 1133759      | 28229                     |
| blastx                   | protein_match            | 1210717      | 37443                     |
| exonerate-est2genome     | expressed_sequence_match | 1825147      | 28718                     |
| exonerate-protein2genome | protein_match            | 1044717      | 36579                     |

- Line 343 : what is "certain other databases of M. sinica" ?

**Response:** Thank you, we have revised this and added the annotated percentages from several different databases, and these can be found in Supplementary Table 19.

“certain other databases, including Pfam (25,850, 59.46%), Coils (2,533, 5.83%), CDD (28,110, 64.70%), SMART (8,247, 18.97%) and others were annotated with InterProScan. (Table S19)”.

- Line 343 : InterProScan (typo)

**Response:** It has been revised.

- Line 344 : 90 % BUSCO value seems very low for a modern assembly. What could explain such a low value ?

**Response:** Thank you. This was because previously we used an old version of BUSCO (v2). In the revision, we have used the last version BUSCO5 and the value improved significantly (97.9%). We have revised this text.

- Line 357-361 : How is it different from (or similar with) the other studies ?

**Response:** We have discussed the relationship between our research results and those from other studies in the discussion section.

- Line 381 : what could explain the very low mapping rate (~90%) of *M. sinica* against itself (same species) ?

**Response:** They are the same species according to the SNP tree and the chloroplast tree, so the low mapping rate of this individuals could be attributed to sequencing artifacts.

- Line 391 : the end of the sentence does not make sense.

**Response:** Thank you, we have deleted this.

- Line 440- 445 : Are these values significant ?

**Response:** Yes, these terms were significant, and we revised the expressions.

- Line 447-448 : There is also *M. obovata* / *M. hypoleuca*

**Response:** Thank you, we have added these.

- Line 631 : Is this script available ?

**Response:** Thank you, it is available, we still have this script. If you would like it, you are welcome to apply to write to the provided communication email and you will receive it soon.

- Table 1. contigs (typo)

**Response:** Thank you, we have revised this.

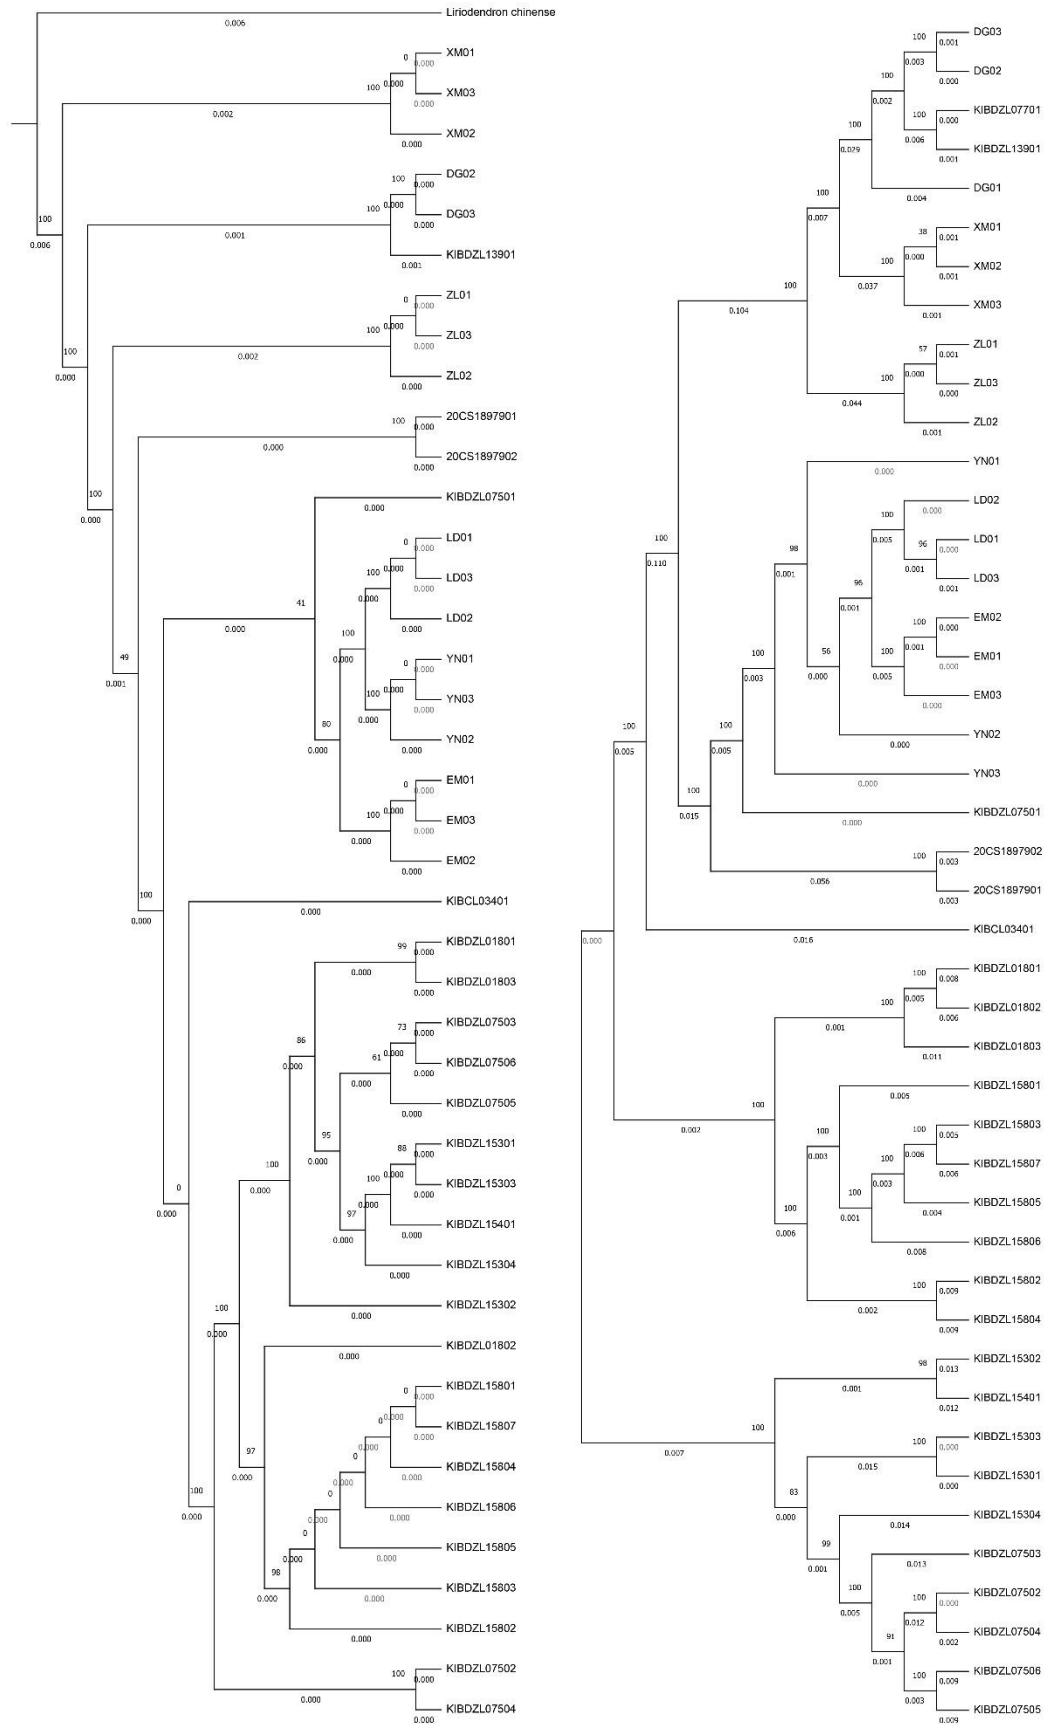

attached figure 1 chloroplast\_tree

attached figure 2 SNP\_tree

## Reference

- Cristofari R, Bertorelle G, Ancel A, et al. Full circumpolar migration ensures evolutionary unity in the Emperor penguin. *Nat Commun.* 2016;7:11842. doi: [org/10.1038/ncomms11842](https://doi.org/10.1038/ncomms11842).
- Dai F, Zhuo X, Luo G et. al. Genomic Resequencing Unravels the Genetic Basis of Domestication, Expansion, and Trait Improvement in *Morus atropurpurea* [J]. *Adv. Sci.*, 2023 [<http://doi.org/10.1002/advs.202300039>]
- Fukushima K, Pollock DD. Detecting macroevolutionary genotype–phenotype associations using error-corrected rates of protein convergence [J]. *Nat Ecol Evol.* 2023;7: 155–170. doi: [org/10.1038/s41559-022-01932-7](https://doi.org/10.1038/s41559-022-01932-7).
- Hanson-Smith V, Kolaczkowski B, Thornton JW. Robustness of Ancestral Sequence Reconstruction to Phylogenetic Uncertainty [J]. *Mol Biol Evol.* 2010;27 (9):1988–1999. Doi: [org/10.1093/molbev/msq081](https://doi.org/10.1093/molbev/msq081).
- Liu S, Zhang L, Sang Y et. al. Demographic History and Natural Selection Shape Patterns of Deleterious Mutation Load and Barriers to Introgression across *Populus* Genome [J]. *Mol. Biol. Evol.*, 2022, 39 (2). [<http://doi.org/10.1093/molbev/msac008>]
- Ma H, Liu YB, Liu DT, et al. Chromosome-level genome assembly and population genetic analysis of a critically endangered rhododendron provide insights into its conservation [J]. *Plant J.* 2021;107(5):1533–45. doi: [10.1111/tpj.15399](https://doi.org/10.1111/tpj.15399).
- Ma Z, Zhang Y, Wu L et. al. High-quality genome assembly and resequencing of modern cotton cultivars provide resources for crop improvement [J]. *Nat. Genet.*, 2021 [<http://doi.org/10.1038/s41588-021-00910-2>]
- Molloy E K, Warnow T. To Include or Not to Include: The Impact of Gene Filtering on Species Tree Estimation Methods [J]. *Syst. Biol.*, 2017, 67 (2): 285–303 [<http://doi.org/10.1093/sysbio/syx077>]
- Salojärvi J, Smolander OP, Nieminen K. et al. Genome sequencing and population genomic analyses provide insights into the adaptive landscape of silver birch [J]. *Nat Genet.* 2017;49:904–912. doi: [org/10.1038/ng.3862](https://doi.org/10.1038/ng.3862).
- Shekhar S, Roch S, Mirarab S. Species Tree Estimation Using ASTRAL: How Many Genes Are Enough? [J]. *IEEE/ACM Transactions on Computational Biology and Bioinformatics*, 2018, 15 (5): 1738–1747 [<http://doi.org/10.1109/TCBB.2017.2757930>]

Wang P, Zhou G, Jian J et. al. Whole-genome assembly and resequencing reveal genomic imprint and key genes of rapid domestication in narrow-leafed lupin [J]. *Plant J.*, 2021, 105 (5): 1192–1210 [<http://doi.org/10.1111/tpj.15100>]

Zhao XF, Ma YP, Sun WB, et al. High genetic diversity and low differentiation of *Michelia coriacea* (Magnoliaceae), a critically endangered endemic in southeast Yunnan, China [J]. *Int J Mol Sci.* 2012;13(4):4396–4411. doi:<https://doi.org/10.3390/ijms13044396>.
